# Supplementary material for: An assessment of spent coffee grounds as a replacement for peat in the production of Scotch whisky: chemical extraction and pyrolysis studies
Source: Royal Society of Chemistry journal article supplement (doi:10.1039/d3fb00088e), 2023-11-13
Supplement: d3fb00088e1.pdf [file d3fb00088e1.pdf]

## Electronic Supplementary Information

### An assessment of spent coffee grounds as a replacement for peat in the production of Scotch Whisky: chemical extraction and pyrolysis studies.

#### Details of Extraction Procedures

Extraction in methanol for 72 hours was determined to give best results. Though not an alcohol matrix (ethanol/water) that replicates whisky, methanol extraction produced more informative spectra. Longer extraction time lead to minimal increase in NMR signal intensity, while severely prolonging the analysis time for each sample. Heating the mixture resulted in loss of some signals. Methanol produces only two  $^1\text{H}$  NMR signals ( $\text{CH}_3$  singlet at 3.34 ppm and OH broad singlet around 4.9 ppm), which is (also) easier to suppress than multiple signals of the ethanol/water mixture, leading to fewer baseline distortions and a cleaner spectrum. However, ethanol/water mixture showed better results, in terms of number of signals and their intensity, for malt samples.

| Peat                                               |                                                                                                             |
|----------------------------------------------------|-------------------------------------------------------------------------------------------------------------|
| P1 (kk67hp1)<br>P2 (kk67hp1_2)<br>P3 (kk67hp1_3)   | 0.5 g of peat stirred in 10 mL of methanol for 72 hours at room temperature                                 |
| P4 (kk67hp2_1)<br>P5 (kk67hp2_2)<br>P6 (kk67hp2_3) | 0.5 g of peat stirred in 10 mL of ethanol/water mixture (10 % ethanol v/v) for 72 hours at room temperature |

**Table S1.** Peat extraction details.

| Coffee Waste                                                |                                                                                                                                        |
|-------------------------------------------------------------|----------------------------------------------------------------------------------------------------------------------------------------|
| CW1 (kk67hwc2_2)<br>CW2 (kkhwc2_3)<br>CW3 (kkhwc2_4)        | 0.5 g of SCG from decaffeinated coffee stirred in 10 mL of methanol for 72 hours                                                       |
| CW4 (kk67hwc3_2)<br>CW5 (kkhwc3_3)<br>CW6 (kkhwc3_4)        | 0.5 g of SCG from decaffeinated coffee stirred in 10 mL of methanol/water mixture (60 % methanol v/v) for 90 minutes at 60 °C          |
| CW7 (kk67hwc4_3)<br>CW8<br>CW9                              | 0.5 g of SCG from decaffeinated coffee stirred in 10 mL of water for 7 days at room temperature                                        |
| CW10 (kk67hwc5_2)<br>CW11 (kkhwc5_3)<br>CW12 (kkhwc5_4)     | 0.5 g of SCG from decaffeinated coffee stirred in 10 mL of ethanol/water (10% of ethanol v/v) mixture for 72 hours at room temperature |
| CW13 (kk67hwc6_1)<br>CW14 (kk67hwc6_2)<br>CW15 (kk67hwc6_3) | 0.5 g of SCG stirred in 10 mL of methanol for 72 hours at room temperature                                                             |
| CW16 (kk67hwc7_2)<br>CW17 (kk67hwc7_3)<br>CW18 (kk67hwc7_4) | 0.5 g of SCG stirred in 10 mL of ethanol/water (10 % of ethanol v/v) mixture for 72 hours at room temperature                          |
| CW19 (kk67hwc8_1)<br>CW20 (kk67hwc8_2)                      | 0.5 g of SCG stirred in 10 mL of methanol/water (60 % of methanol v/v) mixture for 90 minutes at 60 °C                                 |

|                   |  |
|-------------------|--|
| CW21 (kk67hcv8_3) |  |
|-------------------|--|

**Table S2.** Coffee waste extraction details.

|                                                          |                                                                   |
|----------------------------------------------------------|-------------------------------------------------------------------|
| Peat Smoke                                               |                                                                   |
| PS1 (kk67hps2_1)<br>PS2 (kk67hps3_1)<br>PS3 (kk67hps6_1) | Smoke from burning 0.5 g of peat bubbled through 5 mL of methanol |
| PS4 (kk67hps5_1)<br>PS5 (kk67hps5_2)<br>PS6 (kk67hps5_3) | Smoke from burning 1 g of peat bubbled through 5 mL of methanol   |

**Table S3.** Peat smoke collection details.

|                                                                   |                                                                                                                               |
|-------------------------------------------------------------------|-------------------------------------------------------------------------------------------------------------------------------|
| Coffee Waste Smoke                                                |                                                                                                                               |
| CWS1 (kk67hcws2_1)<br>CWS2 (kk67hcws2_2)<br>CWS3 (kk67hcws2_3)    | Smoke from burning 0.5 g of SCG from decaffeinated coffee bubbled through 5 mL of ethanol/water (10 % of ethanol v/v) mixture |
| CWS4 (kk67hcws3_1)<br>CWS5 (kk67hcws3_2)<br>CWS6 (kk67hcws3_3)    | Smoke from burning 0.5 g of SCG from decaffeinated coffee bubbled through 5 mL of methanol                                    |
| CWS7 (kk67hcws5_1)<br>CWS8 (kk67hcws7_1)<br>CWS9 (kk67hcws8_1)    | Smoke from burning 0.5 g of SCG bubbled through 5 mL of methanol                                                              |
| CWS10 (kk67hcws6_1)<br>CWS11 (kk67hcws6_2)<br>CWS12 (kk67hcws6_3) | Smoke from burning 1 g of SCG bubbled through 5 mL of methanol                                                                |

**Table S4.** Coffee waste smoke collection details.

|                                                             |                                                                                                    |
|-------------------------------------------------------------|----------------------------------------------------------------------------------------------------|
| Industrially Peated Malt                                    |                                                                                                    |
| IPM1 (kk67hpm4_1)<br>IPM2 (kk67hpm4_2)<br>IPM3 (kk67hpm4_3) | 0.5 g of industrially peated malt stirred in 10 mL of methanol for 72 hours at room temperature    |
| IPM4 (kk67hpm5_1)<br>IPM5 (kk67hpm5_2)<br>IPM6 (kk67hpm5_3) | 0.5 g of industrially peated malt stirred in 10 mL of ethanol/water (10 % of ethanol v/v) mixture. |

**Table S5.** Industrially peated malt extraction details.

|                                                                |                                                                                                                            |
|----------------------------------------------------------------|----------------------------------------------------------------------------------------------------------------------------|
| "Coffee Peated" Malt                                           |                                                                                                                            |
| CPM1 (kk67hcpm9_1)<br>CPM2 (kk67hcpm9_2)<br>CPM3 (kk67hcpm9_3) | 0.5 g of coffee peated malt stirred in 10 mL of water for 3 days at room temperature                                       |
| CPM4 (kk67hcpm2_2)<br>CPM5 (kkhcpm2_3)<br>CPM6 (kkhcpm2_4)     | 0.5 g of coffee peated malt stirred in 10 mL of ethanol/water (10 % of ethanol v/v) mixture for 7 days at room temperature |
| CPM7 (kk67hcpm4_3)<br>CPM8<br>CPM9                             | 0.5 g of coffee peated malt stirred in 10 mL of water for 7 days at 70 °C                                                  |
| CPM10 (kk67hcpm5_3)<br>CPM11                                   | 0.5 g of coffee peated malt stirred in 10 mL of methanol for 7 days at room temperature                                    |

|                                                                   |                                                                                                                                         |
|-------------------------------------------------------------------|-----------------------------------------------------------------------------------------------------------------------------------------|
| CPM12                                                             |                                                                                                                                         |
| CPM13 (kk67hcpm6_1)<br>CPM14 (kk67hcpm6_2)<br>CPM15 (kk67hcpm6_3) | 0.5 g of light coloured coffee peated malt stirred in 10 mL of ethanol/water (10 % of ethanol) mixture for 72 hours at room temperature |
| CPM16 (kk67hcpm7_1)<br>CPM17 (kk67hcpm7_2)<br>CPM18 (kk67hcpm7_3) | 0.5 g of dark coloured coffee peated malt stirred in 10 mL of ethanol/water (10 % of ethanol) mixture for 72 hours at room temperature  |

**Table S6.** „Coffee peated” malt extraction details.

### NMR spectra – pure compounds

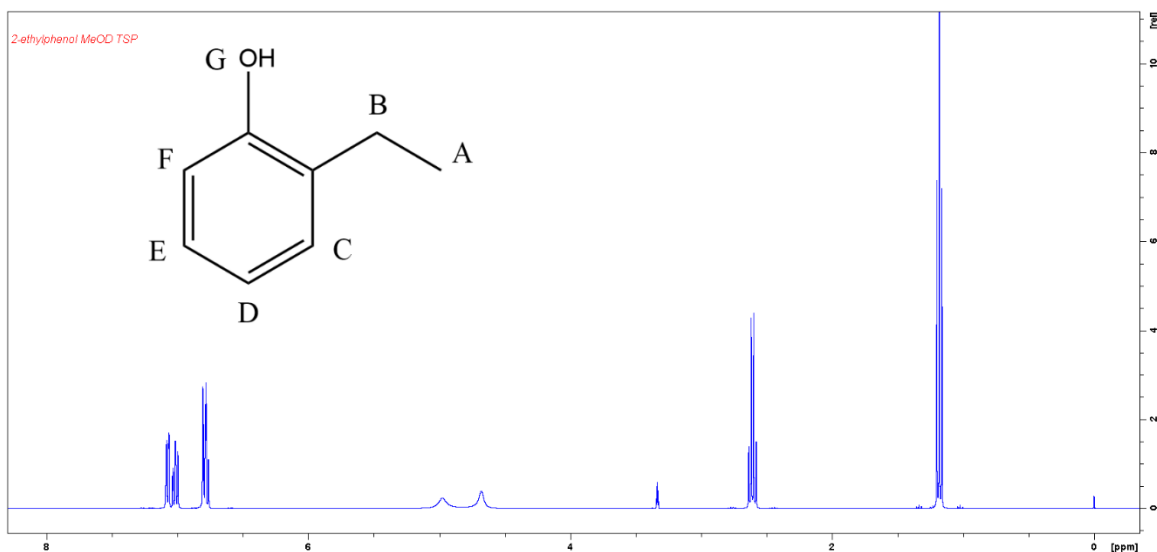

**Figure S1.** <sup>1</sup>H NMR spectrum of 2-ethylphenol in methanol-d<sub>4</sub> recorded at 400 MHz.

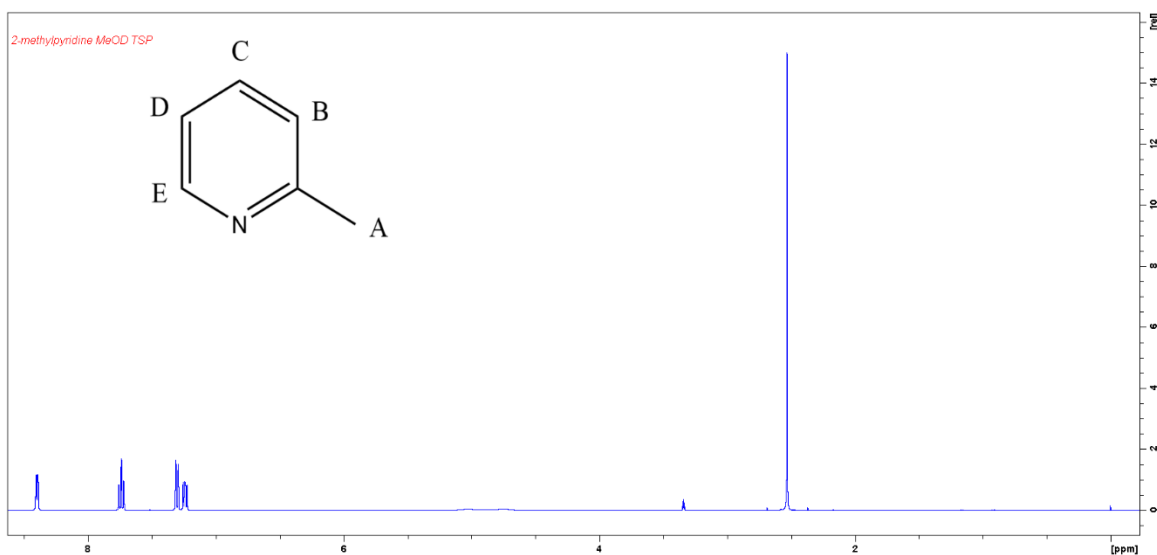

**Figure S2.** <sup>1</sup>H NMR spectrum of 2-methylpyridine in methanol-d<sub>4</sub> recorded at 400 MHz.

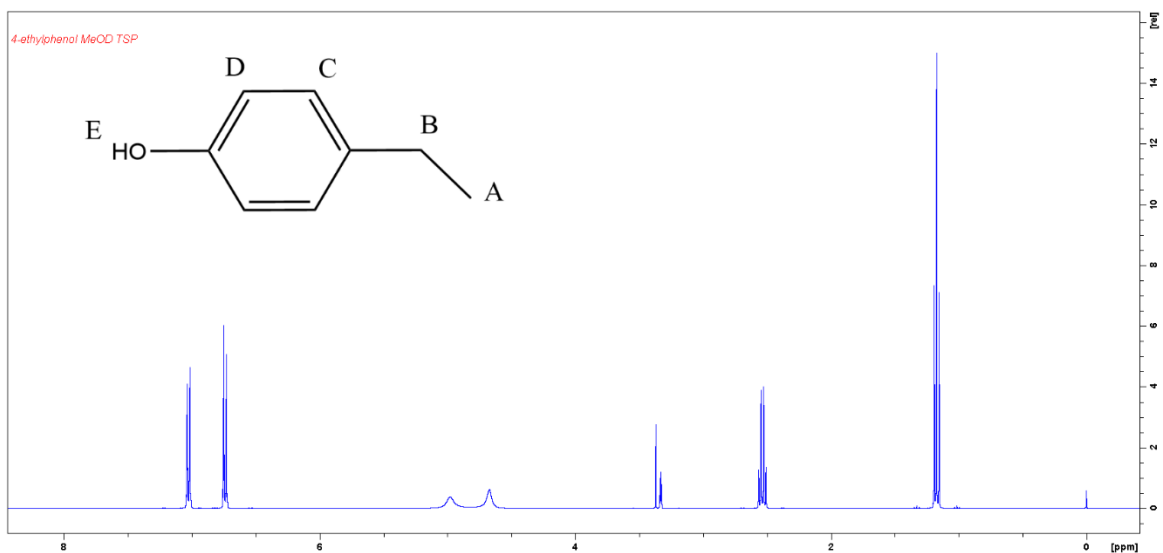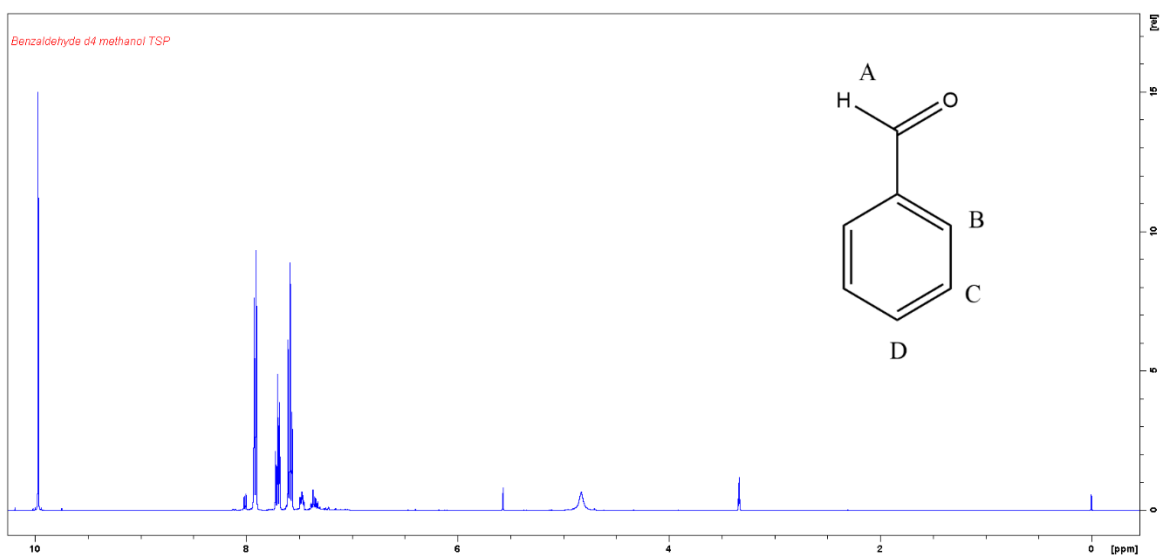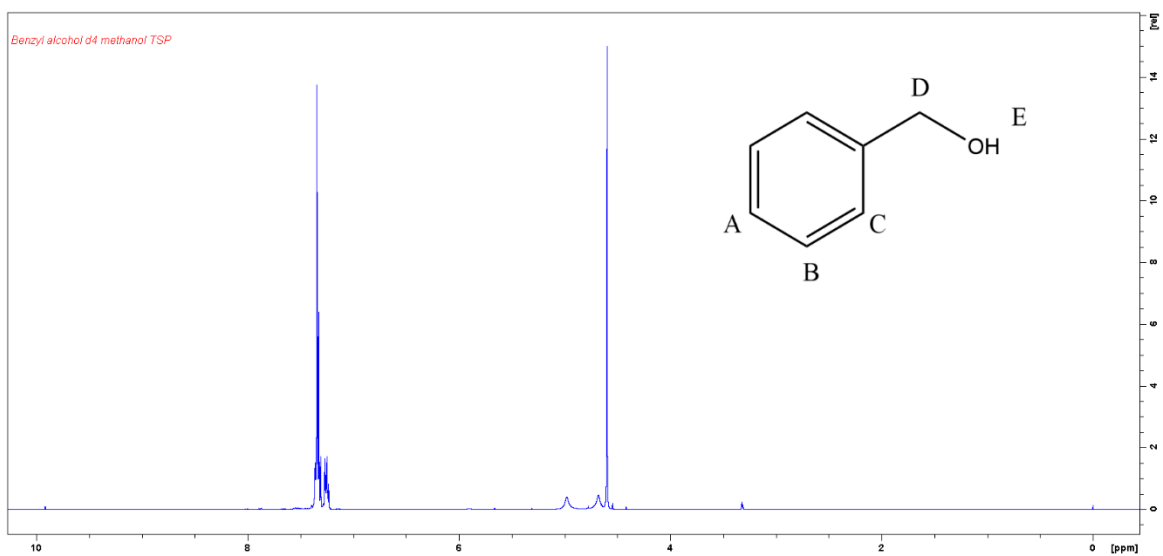

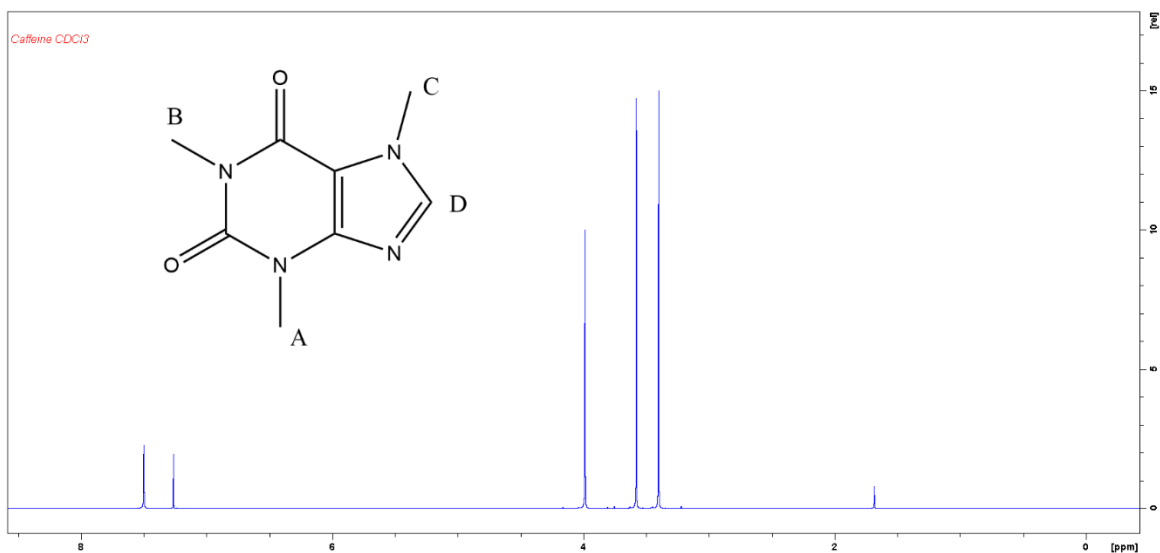

**Figure S6.** <sup>1</sup>H NMR spectrum of caffeine in CDCl<sub>3</sub> recorded at 400 MHz.

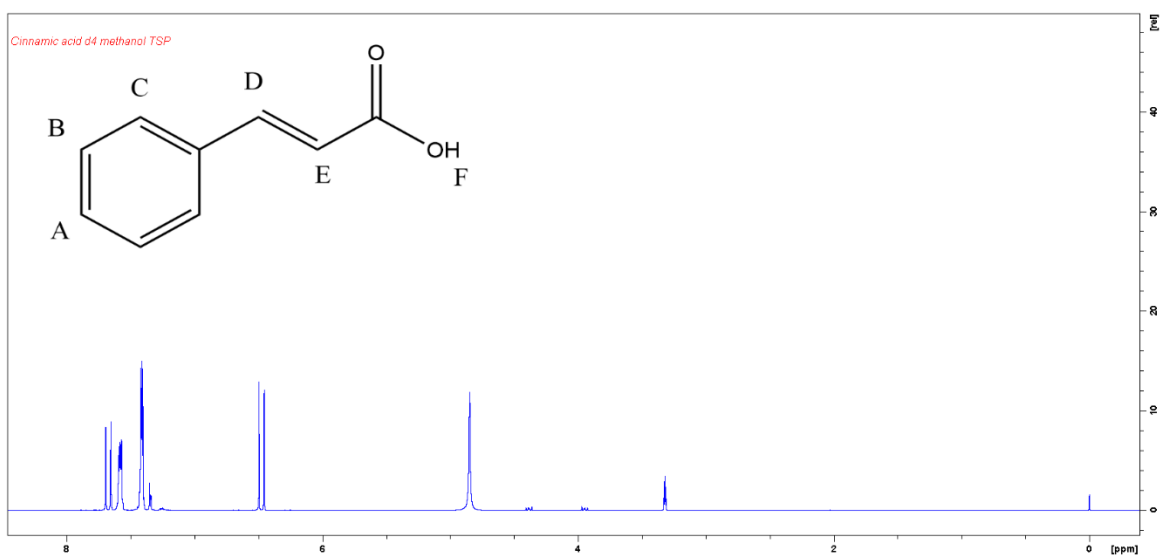

**Figure S7.** <sup>1</sup>H NMR spectrum of cinnamic acid in methanol-d<sub>4</sub> recorded at 400 MHz.

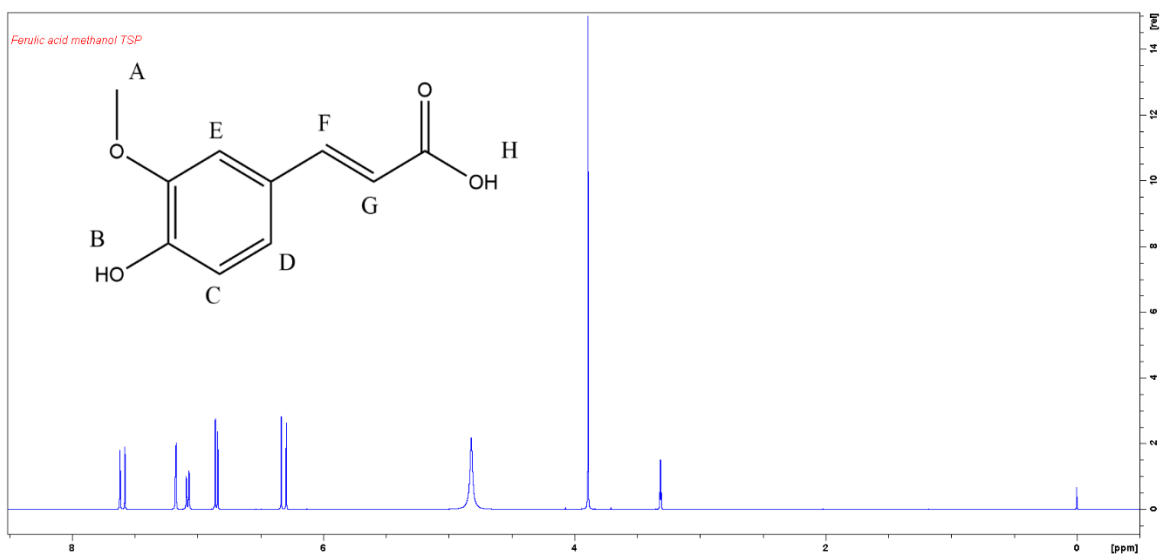

**Figure S8.** <sup>1</sup>H NMR spectrum of ferulic acid in methanol-d<sub>4</sub> recorded at 400 MHz.

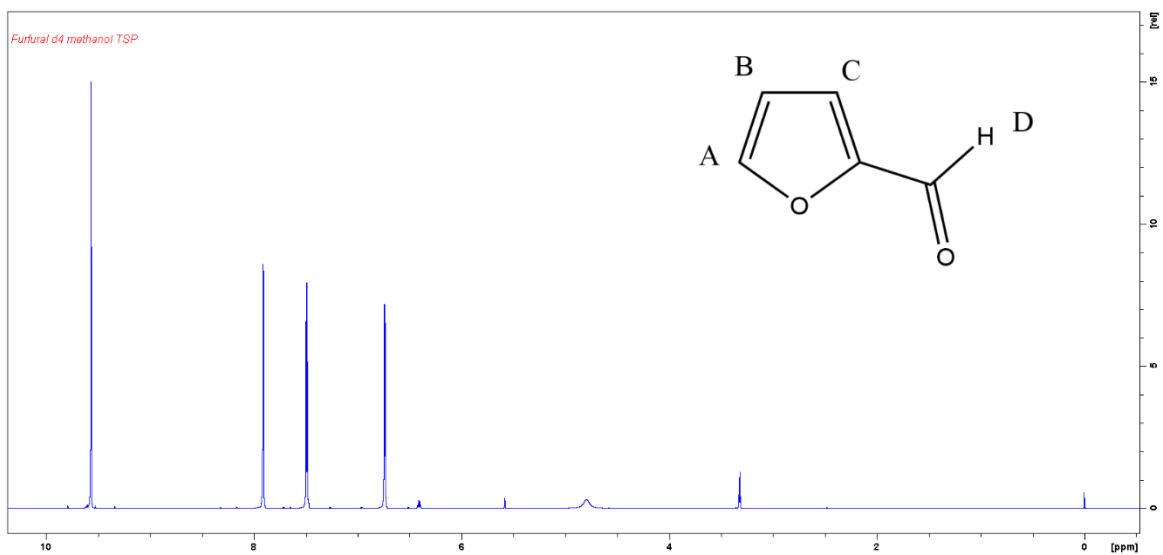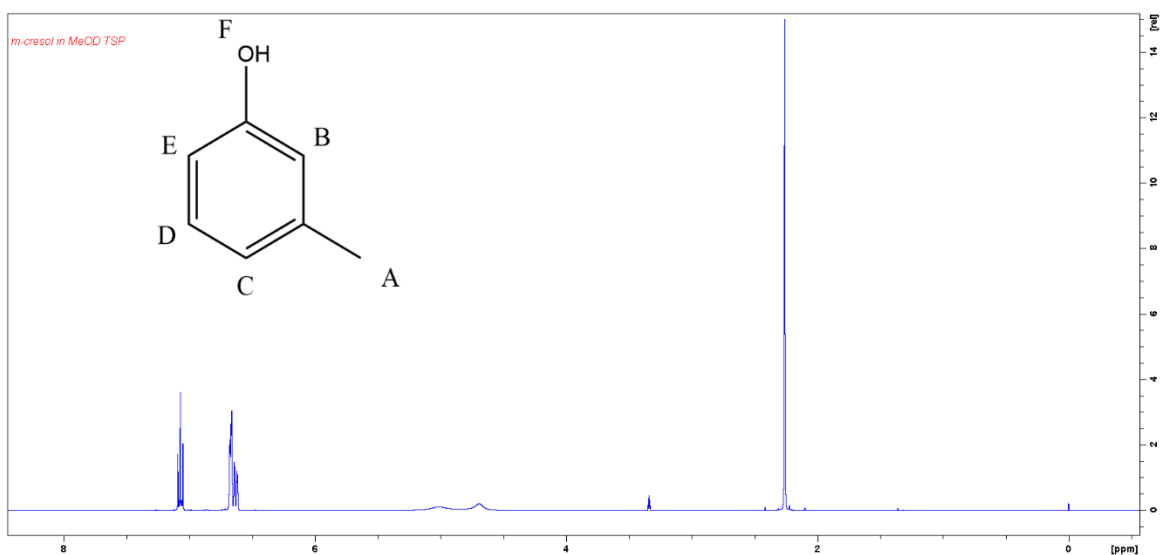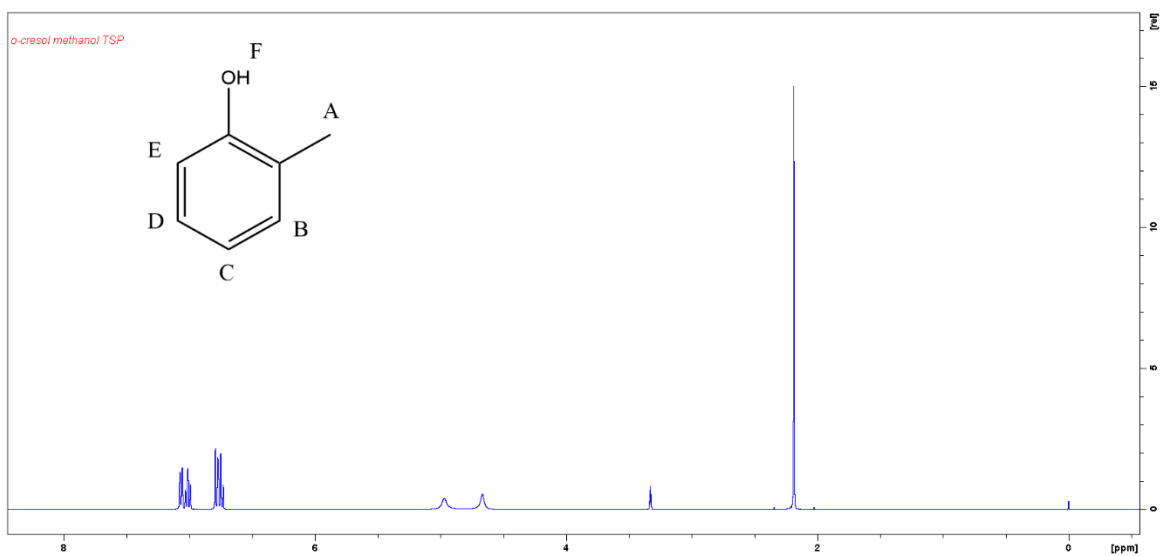

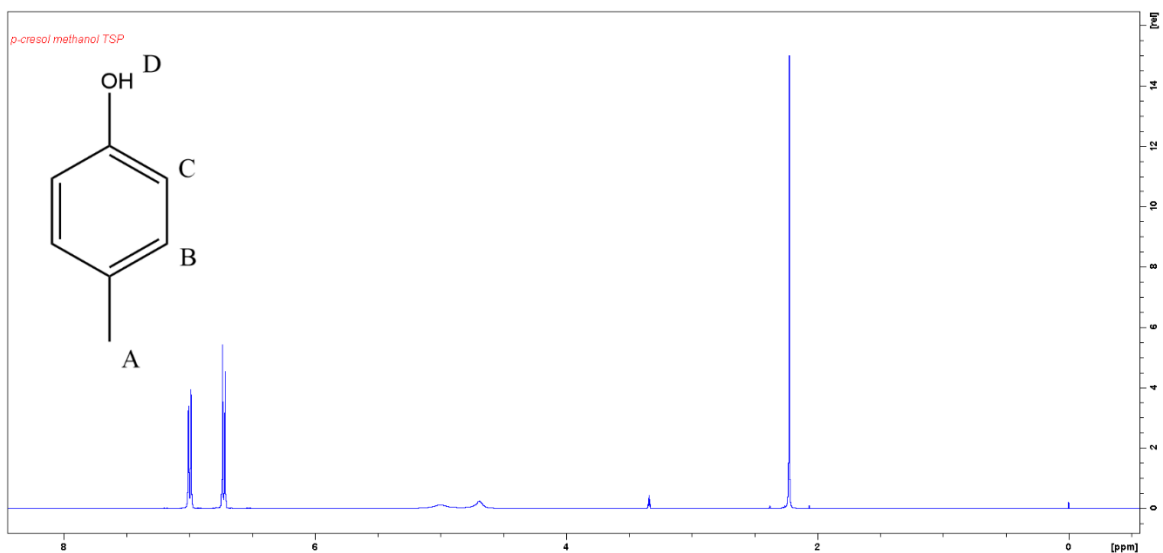

**Figure S12.**  $^1\text{H}$  NMR spectrum of *p*-cresol in methanol- $d_4$  recorded at 400 MHz.

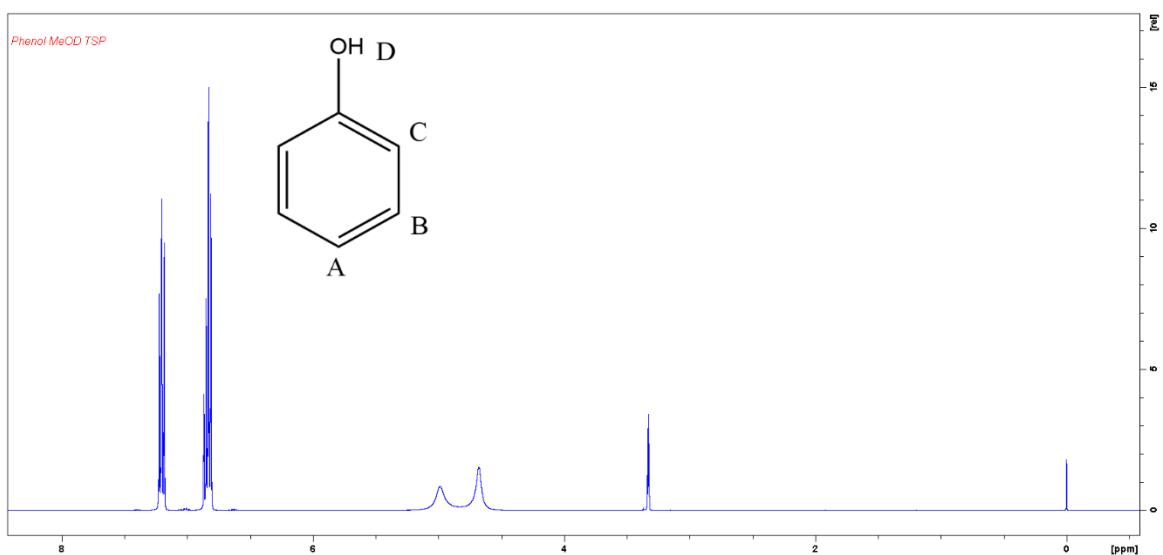

**Figure S13.**  $^1\text{H}$  NMR spectrum of phenol in methanol- $d_4$  recorded at 400 MHz.

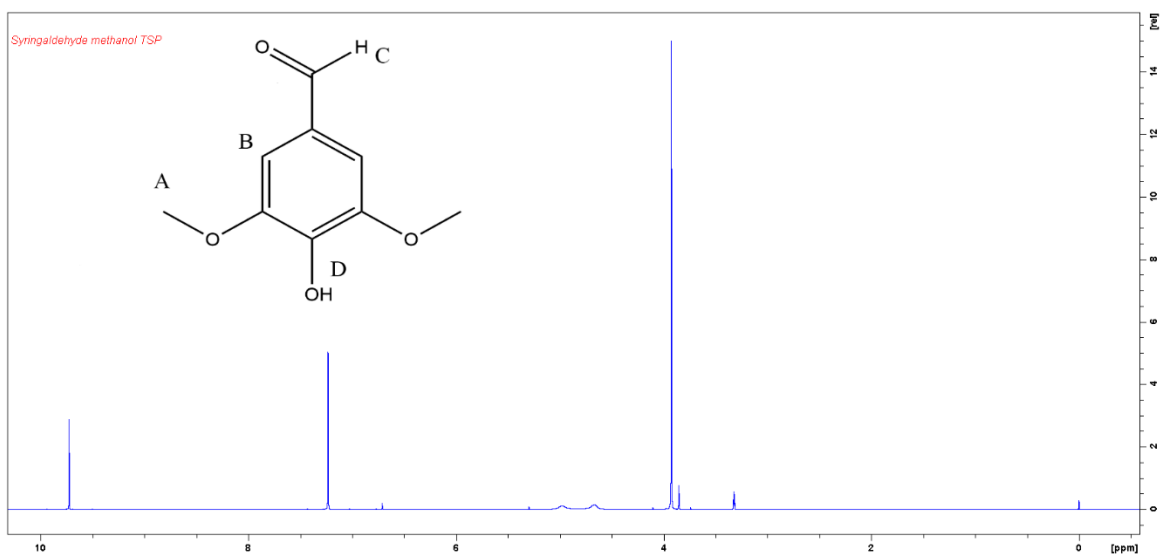

**Figure S14.**  $^1\text{H}$  NMR spectrum of syringaldehyde in methanol- $d_4$  recorded at 400 MHz.

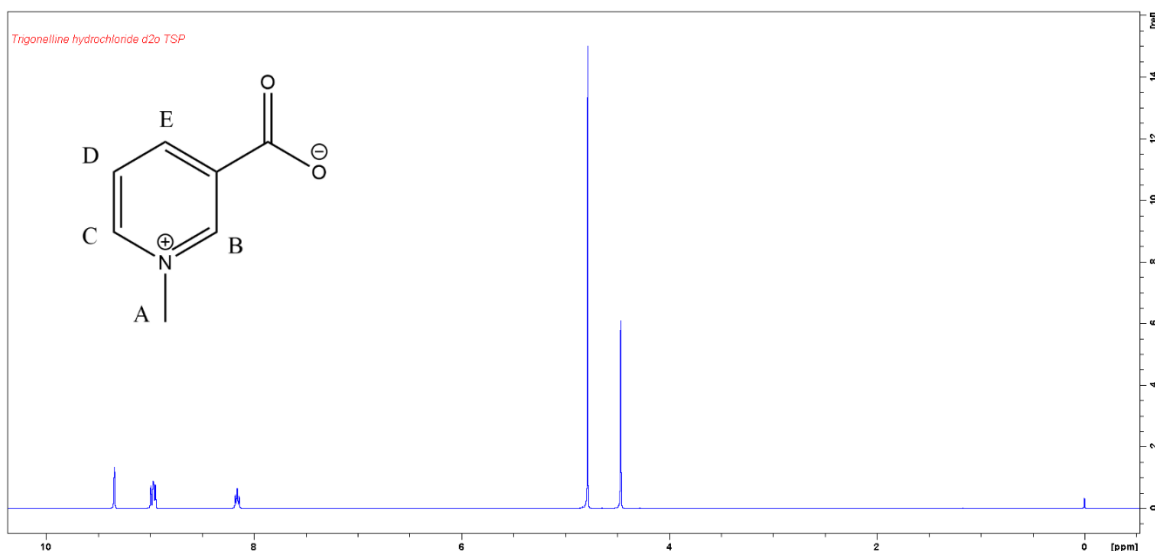

Figure S15. <sup>1</sup>H NMR spectrum of trigonelline hydrochloride in D<sub>2</sub>O recorded at 400 MHz.

### Signal assignments – pure compounds

| 2-ethylphenol, C <sub>8</sub> H <sub>10</sub> O |                                                                       |             |                                                                  |
|-------------------------------------------------|-----------------------------------------------------------------------|-------------|------------------------------------------------------------------|
| δ <sub>H</sub> / ppm                            | Multiplicity                                                          | Integration | Inferences                                                       |
| 1.18                                            | Triplet, <sup>3</sup> J = 7.5 Hz                                      | 3H          | CH <sub>3</sub> next to CH <sub>2</sub> (A)                      |
| 2.61                                            | Quartet, <sup>3</sup> J = 7.5 Hz                                      | 2H          | CH <sub>2</sub> next to CH <sub>3</sub> and aromatic ring (B)    |
| 4.68                                            | Broad singlet                                                         | ~ 1H        | OH (G)                                                           |
| 6.78                                            | Triplet of doublets, <sup>3</sup> J = 7.4 Hz, <sup>4</sup> J = 1.2 Hz | 1H          | Aromatic CH coupling to 2xCH, with long range coupling to CH (D) |
| 6.80                                            | Doublet of doublets, <sup>3</sup> J = 8.1 Hz, <sup>4</sup> J = 0.9 Hz | 1H          | Aromatic CH coupling to CH, with long range coupling to CH (F)   |
| 7.01                                            | Triplet of doublets, <sup>3</sup> J = 7.7 Hz, <sup>4</sup> J = 1.7 Hz | 1H          | Aromatic CH coupling to 2xCH, with long range coupling to CH (E) |
| 7.08                                            | Doublet of doublets, <sup>3</sup> J = 7.4 Hz, <sup>4</sup> J = 1.3 Hz | 1H          | Aromatic CH coupling to CH, with long range coupling to CH (C)   |

Table S7. Signal assignment for 2-ethylphenol.

| 2-methylpyridine, C <sub>7</sub> H <sub>7</sub> N |                                                                                                           |             |                                                                                                  |
|---------------------------------------------------|-----------------------------------------------------------------------------------------------------------|-------------|--------------------------------------------------------------------------------------------------|
| δ <sub>H</sub> / ppm                              | Multiplicity                                                                                              | Integration | Inferences                                                                                       |
| 2.53                                              | Singlet                                                                                                   | 3H          | CH <sub>3</sub> isolated, next to aromatic ring (A)                                              |
| 7.24                                              | Doublet of doublet of doublets, <sup>3</sup> J = 7.5 Hz, <sup>3</sup> J = 5.1 Hz, <sup>4</sup> J = 1.1 Hz | 1H          | Aromatic CH, coupling to 2xCH (different coupling constants), with long range coupling to CH (D) |
| 7.30                                              | Doublet <sup>3</sup> J = 2.6 Hz                                                                           | 1H          | Aromatic CH coupling to CH (B)                                                                   |
| 7.74                                              | Triplet of doublets, <sup>3</sup> J = 7.7 Hz, <sup>4</sup> J = 1.8 Hz                                     | 1H          | Aromatic CH coupling to 2xCH, with long range coupling to CH (C)                                 |
| 8.40                                              | Doublet of doublets, <sup>3</sup> J = 5.0 Hz, <sup>4</sup> J = 1.6 Hz                                     | 1H          | Aromatic CH coupling to 2xCH (different coupling constants) (E)                                  |

Table S8. Signal assignment for 2-methylpyridine.

| 4-ethylphenol, C <sub>8</sub> H <sub>10</sub> O |                                  |             |                                             |
|-------------------------------------------------|----------------------------------|-------------|---------------------------------------------|
| δ <sub>H</sub> / ppm                            | Multiplicity                     | Integration | Inferences                                  |
| 1.17                                            | Triplet, <sup>3</sup> J = 7.6 Hz | 3H          | CH <sub>3</sub> next to CH <sub>2</sub> (A) |



|      |                         |      |                                                      |
|------|-------------------------|------|------------------------------------------------------|
| 2.53 | Quartet, $^3J = 7.6$ Hz | 2H   | CH <sub>2</sub> next to CH <sub>3</sub> (B)          |
| 4.67 | Broad singlet           | ~ 1H | OH (E)                                               |
| 6.74 | AA'XX'                  | 2H   | 2 x aromatic CH near OH (D)                          |
| 7.02 | AA'XX'                  | 2H   | 2 x aromatic CH near CH <sub>2</sub> CH <sub>3</sub> |

**Table S9.** Signal assignment for 4-ethylphenol.

| Benzaldehyde, C <sub>7</sub> H <sub>6</sub> O |                                                     |             |                                                           |
|-----------------------------------------------|-----------------------------------------------------|-------------|-----------------------------------------------------------|
| $\delta_H$ / ppm                              | Multiplicity                                        | Integration | Inferences                                                |
| 7.58                                          | Triplet, $^3J = 7.6$ Hz                             | 2H          | 2 x aromatic CH, each next to 2xCH (C)                    |
| 7.70                                          | Triplet of triplets, $^3J = 7.4$ Hz, $^4J = 1.8$ Hz | 1H          | Aromatic CH next to 2xCH, long range coupling to 2xCH (D) |
| 7.91                                          | Doublet of doublets                                 | 2H          | 2 x aromatic CH, next to CH (B)                           |
| 9.97                                          | Singlet                                             | 1H          | CHO, isolated (A)                                         |

**Table S10.** Signal assignment for benzaldehyde.

| Benzyl alcohol, C <sub>7</sub> H <sub>8</sub> O |               |             |                                               |
|-------------------------------------------------|---------------|-------------|-----------------------------------------------|
| $\delta_H$ / ppm                                | Multiplicity  | Integration | Inferences                                    |
| 4.60                                            | Singlet       | 2H          | CH <sub>2</sub> isolated, next to OH (D)      |
| 4.68                                            | Broad singlet | ~0.5 H      | OH                                            |
| ~7.3                                            | Multiplet     | 5H          | 5x aromatic CH coupling to each other (A,B,C) |

**Table S11.** Signal assignment for benzyl alcohol.

| Caffeine, C <sub>8</sub> H <sub>10</sub> O <sub>2</sub> N <sub>4</sub> |              |             |                                         |
|------------------------------------------------------------------------|--------------|-------------|-----------------------------------------|
| $\delta_H$ / ppm                                                       | Multiplicity | Integration | Inferences                              |
| 3.40                                                                   | Singlet      | 3H          | CH <sub>3</sub> isolated, next to N (A) |
| 3.58                                                                   | Singlet      | 3H          | CH <sub>3</sub> isolated, next to N (B) |
| 3.98                                                                   | Singlet      | 3H          | CH <sub>3</sub> isolated, next to N (C) |
| 7.47                                                                   | Singlet      | 1H          | Aromatic CH, isolated (D)               |

**Table S12.** Signal assignment for caffeine.

| Cinnamic acid, C <sub>9</sub> H <sub>8</sub> O <sub>2</sub> |                        |             |                                                    |
|-------------------------------------------------------------|------------------------|-------------|----------------------------------------------------|
| $\delta_H$ / ppm                                            | Multiplicity           | Integration | Inferences                                         |
| 6.48                                                        | Doublet, $^3J = 16$ Hz | 1H          | Trans alkene CH, next to aromatic ring (D)         |
| 7.41                                                        | Multiplet              | 3H          | 3x aromatic CH, meta and para to substituent (A,B) |
| 7.58                                                        | Multiplet              | 2H          | 2x aromatic CH, ortho to substituent (C)           |
| 7.67                                                        | Doublet, $^3J = 16$ Hz | 1H          | Trans alkene CH, next to COOH (E)                  |

**Table S13.** Signal assignment for cinnamic acid.

| Ferulic acid, C <sub>10</sub> H <sub>10</sub> O <sub>3</sub> |                                                     |             |                                                                |
|--------------------------------------------------------------|-----------------------------------------------------|-------------|----------------------------------------------------------------|
| $\delta_H$ / ppm                                             | Multiplicity                                        | Integration | Inferences                                                     |
| 3.89                                                         | Singlet                                             | 3H          | CH <sub>3</sub> isolated, next to O (A)                        |
| 6.31                                                         | Doublet, $^3J = 16$ Hz                              | 1H          | Trans alkene CH, next to aromatic ring (F)                     |
| 6.85                                                         | Doublet, $^3J = 8.2$ Hz                             | 1H          | Aromatic CH coupling to CH (C)                                 |
| 7.08                                                         | Doublet of doublets, $^3J = 8.3$ Hz, $^4J = 1.9$ Hz | 1H          | Aromatic CH coupling to CH, with long range coupling to CH (D) |
| 7.17                                                         | Doublet, $^4J = 1.9$ Hz                             | 1H          | Aromatic CH with long range coupling to CH (E)                 |
| 7.60                                                         | Doublet, $^3J = 16$ Hz                              | 1H          | Trans alkene CH, next to COOH (G)                              |

**Table S14.** Signal assignment for ferulic acid.

| Furfural, C <sub>5</sub> H <sub>4</sub> O <sub>2</sub> |                                                     |             |                                                                      |
|--------------------------------------------------------|-----------------------------------------------------|-------------|----------------------------------------------------------------------|
| $\delta_H$ / ppm                                       | Multiplicity                                        | Integration | Inferences                                                           |
| 6.74                                                   | Doublet of doublets, $^3J = 3.6$ Hz, $^3J = 1.7$ Hz | 1H          | Aromatic CH coupling to 2xCH (with different coupling constants) (B) |
| 7.49                                                   | Doublet of doublets, $^3J = 3.6$ Hz, $^4J = 0.6$ Hz | 1H          | Aromatic CH coupling to CH, with long range coupling to CH(C)        |
| 7.91                                                   | Doublet of doublets, $^3J = 1.6$ Hz, $^4J = 0.8$ Hz | 1H          | Aromatic CH coupling to CH, with long range coupling to CH(A)        |
| 9.57                                                   | Doublet, $^4J = 0.8$ Hz                             | 1H          | CHO with long range coupling to CH(D)                                |

**Table S15.** Signal assignment for furfural.

| <i>m</i> -cresol C <sub>7</sub> H <sub>9</sub> O |                         |             |                                                          |
|--------------------------------------------------|-------------------------|-------------|----------------------------------------------------------|
| $\delta_H$ / ppm                                 | Multiplicity            | Integration | Inferences                                               |
| 2.26                                             | Singlet                 | 3H          | CH <sub>3</sub> isolated, next to aromatic ring (A)      |
| 4.69                                             | Broad singlet           | ~1H         | OH (F)                                                   |
| 6.63                                             | Multiplet               | 1H          | Aromatic CH ortho to OH (B)                              |
| 6.67                                             | Multiplet               | 2H          | Aromatic CH ortho to OH and aromatic CH para to OH (C,E) |
| 7.07                                             | Triplet, $^3J = 8.0$ Hz | 1H          | Aromatic CH meta to OH, coupling to 2xCH (D)             |

**Table S16.** Signal assignment for *m*-cresol.

| <i>o</i> -cresol C <sub>7</sub> H <sub>9</sub> O |                         |             |                                                     |
|--------------------------------------------------|-------------------------|-------------|-----------------------------------------------------|
| $\delta_H$ / ppm                                 | Multiplicity            | Integration | Inferences                                          |
| 2.19                                             | Singlet                 | 3H          | CH <sub>3</sub> isolated, next to aromatic ring (A) |
| 4.67                                             | Broad singlet           | ~1H         | OH (F)                                              |
| 6.75                                             | Triplet, $^3J = 7.4$ Hz | 1H          | Aromatic CH coupling to 2xCH, para to OH (C)        |
| 6.78                                             | Doublet, $^3J = 8.0$ Hz | 1H          | Aromatic CH coupling to CH, ortho to OH (E)         |
| 7.01                                             | Triplet, $^3J = 7.7$ Hz | 1H          | Aromatic CH coupling to 2xCH, meta to OH (D)        |
| 7.06                                             | Doublet, $^3J = 7.4$ Hz | 1H          | Aromatic CH coupling to CH, meta to OH (B)          |

**Table S17.** Signal assignment for *o*-cresol.

| <i>p</i> -cresol C <sub>7</sub> H <sub>9</sub> O |                         |             |                                                     |
|--------------------------------------------------|-------------------------|-------------|-----------------------------------------------------|
| $\delta_H$ / ppm                                 | Multiplicity            | Integration | Inferences                                          |
| 2.26                                             | Singlet                 | 3H          | CH <sub>3</sub> isolated, next to aromatic ring (A) |
| 4.69                                             | Broad singlet           | ~1H         | OH (D)                                              |
| 6.72                                             | Doublet, $^3J = 8.5$ Hz | 2H          | 2x aromatic CH next to CH (C)                       |
| 6.99                                             | Doublet, $^3J = 8.0$ Hz | 2H          | 2x aromatic CH next to CH (B)                       |

**Table S18.** Signal assignment for *p*-cresol.

| Syringaldehyde C <sub>9</sub> H <sub>10</sub> O <sub>4</sub> |              |             |                                            |
|--------------------------------------------------------------|--------------|-------------|--------------------------------------------|
| $\delta_H$ / ppm                                             | Multiplicity | Integration | Inferences                                 |
| 3.92                                                         | Singlet      | 6H          | 2x CH <sub>3</sub> isolated, next to O (A) |
| 7.23                                                         | Singlet      | 2H          | 2x Aromatic CH (B)                         |
| 9.72                                                         | Singlet      | 1           | CHO                                        |

**Table S19.** Signal assignment for syringaldehyde.

| Trigonelline hydrochloride C <sub>7</sub> H <sub>8</sub> O <sub>2</sub> NCl |              |             |                                         |
|-----------------------------------------------------------------------------|--------------|-------------|-----------------------------------------|
| $\delta_H$ / ppm                                                            | Multiplicity | Integration | Inferences                              |
| 4.46                                                                        | Singlet      | 3H          | CH <sub>3</sub> isolated, next to N (A) |

|      |                         |    |                                |
|------|-------------------------|----|--------------------------------|
| 8.16 | Triplet $^3J = 7.0$ Hz  | 1H | Aromatic CH next to 2 x CH (D) |
| 8.96 | Doublet, $^3J = 7.0$ Hz | 1H | Aromatic CH next to CH (E)     |
| 8.98 | Doublet, $^3J = 8.3$ Hz | 1H | Aromatic CH next to CH (C)     |
| 9.34 | Singlet                 | 1  | Aromatic CH isolated (B)       |

**Table S20.** Signal assignment for trigonelline hydrochloride.

## NMR spectra

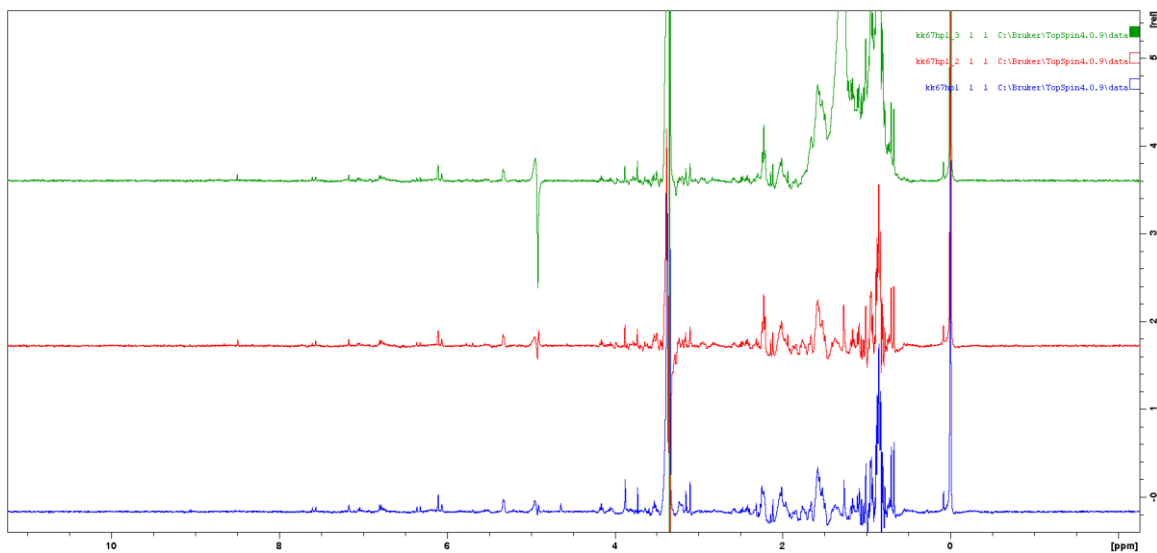

**Figure S16.**  $^1\text{H}$  NMR spectra of P1 (bottom), P2 (middle), P3 (top) recorded at 400 MHz.

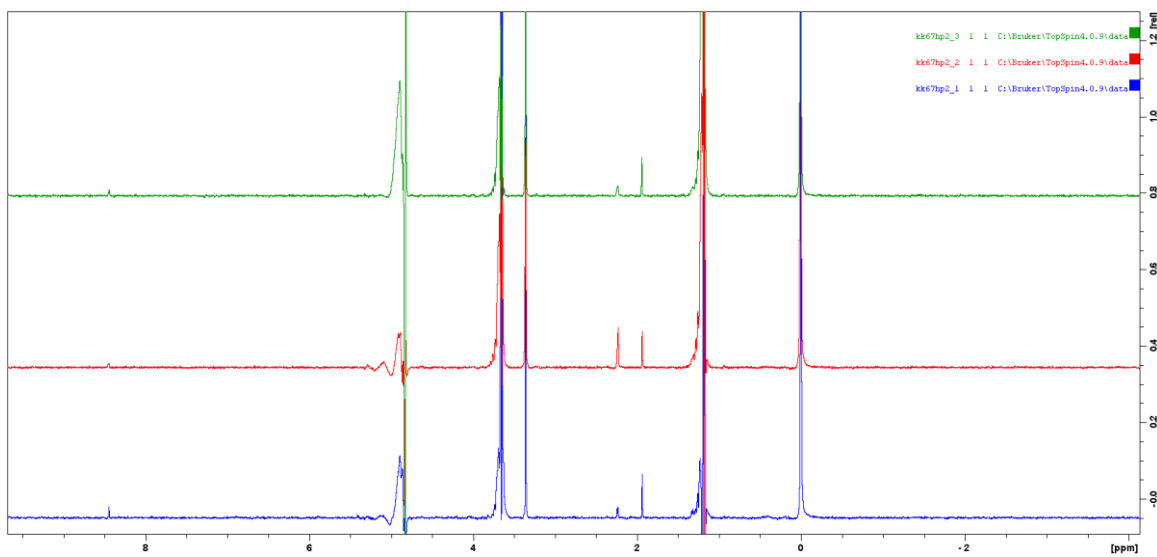

**Figure S17.**  $^1\text{H}$  NMR spectra of P4 (bottom), P5 (middle), P6 (top) recorded at 400 MHz.

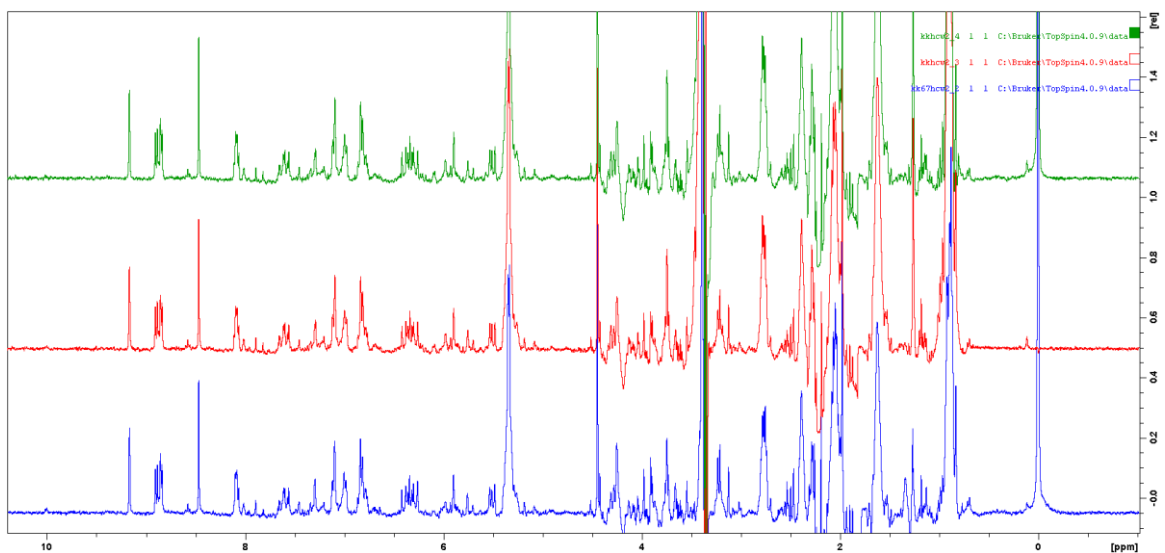

**Figure S18.**  $^1\text{H}$  NMR spectra of CW1 (bottom), CW2 (middle), CW3 (top) recorded at 400 MHz.

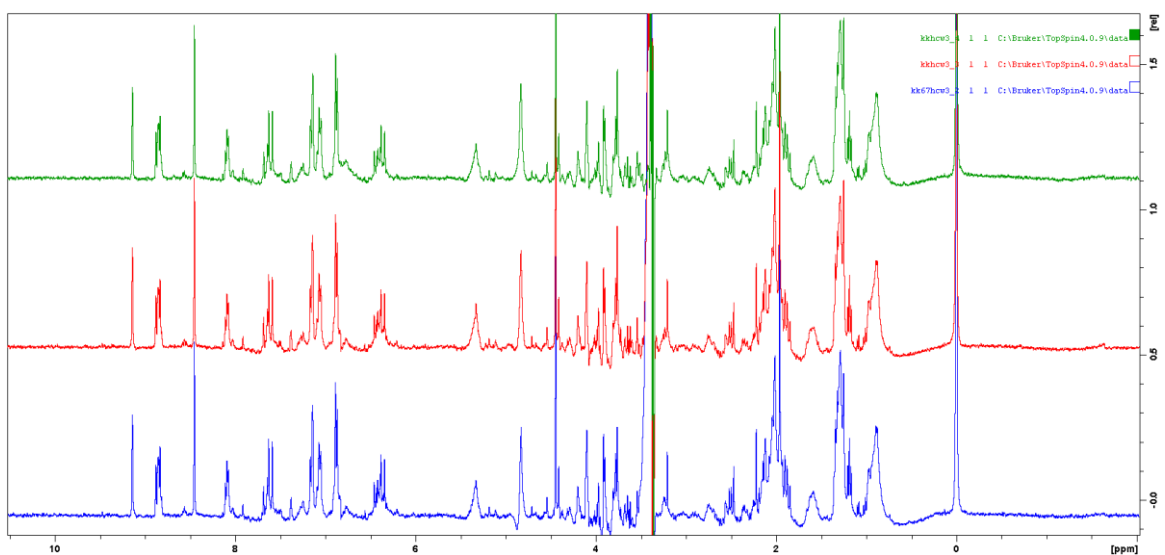

**Figure S19.**  $^1\text{H}$  NMR spectra of CW4 (bottom), CW5 (middle), CW6 (top) recorded at 400 MHz.

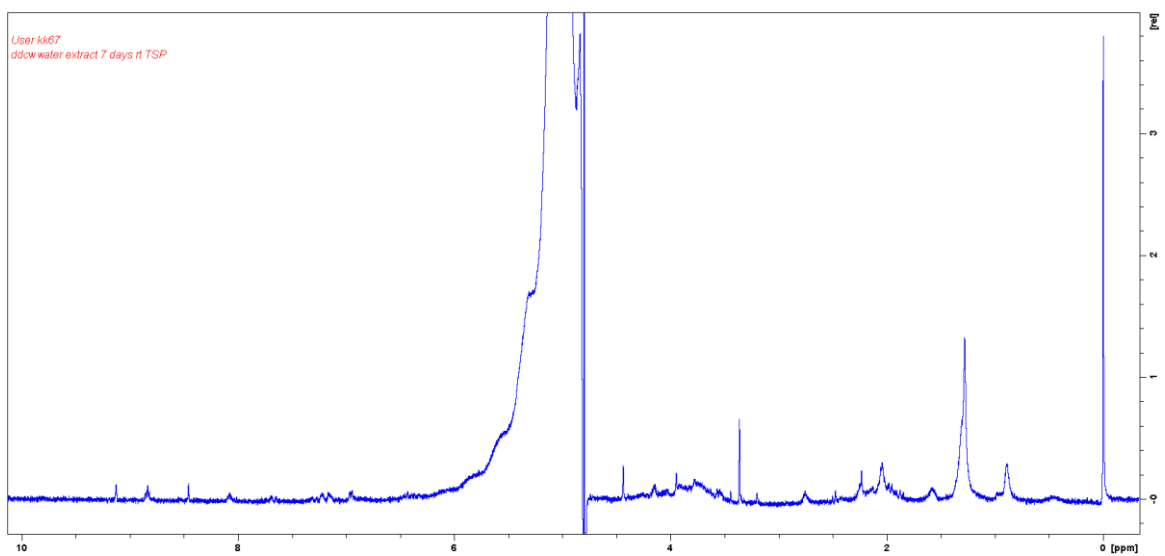

**Figure S20.**  $^1\text{H}$  NMR spectra of CW7 recorded at 400 MHz.

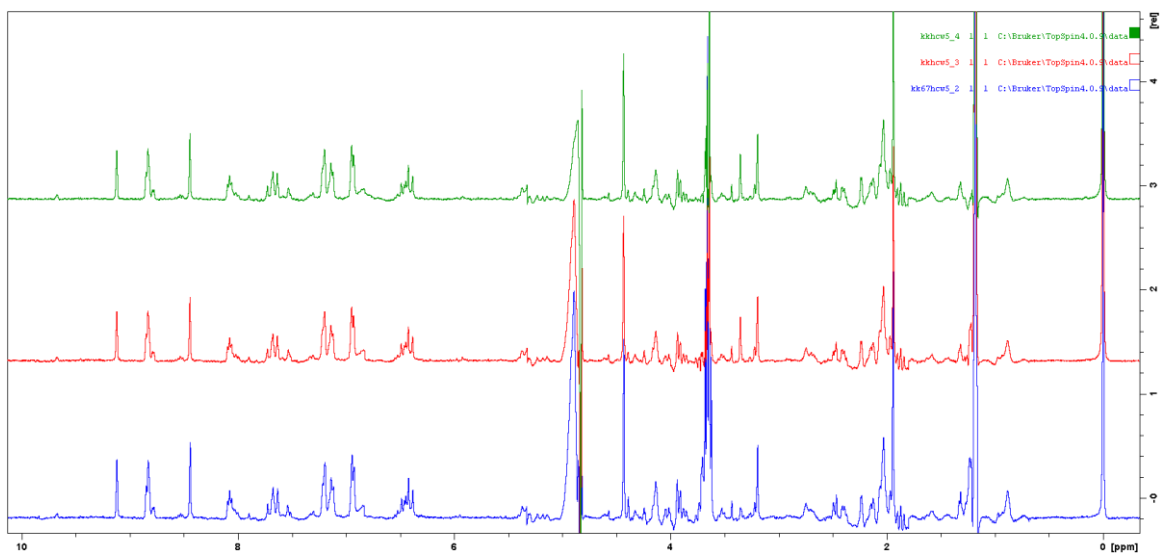

**Figure S21.** <sup>1</sup>H NMR spectra of CW10 (bottom), CW11 (middle), CW12 (top) recorded at 400 MHz.

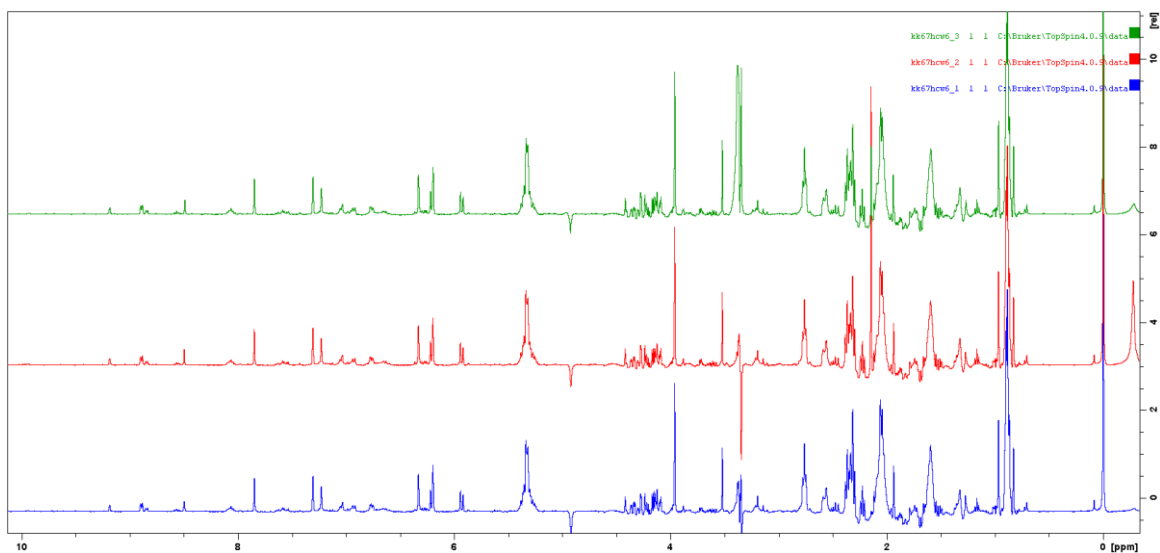

**Figure S22.** <sup>1</sup>H NMR spectra of CW13 (bottom), CW14 (middle), CW15 (top) recorded at 400 MHz.

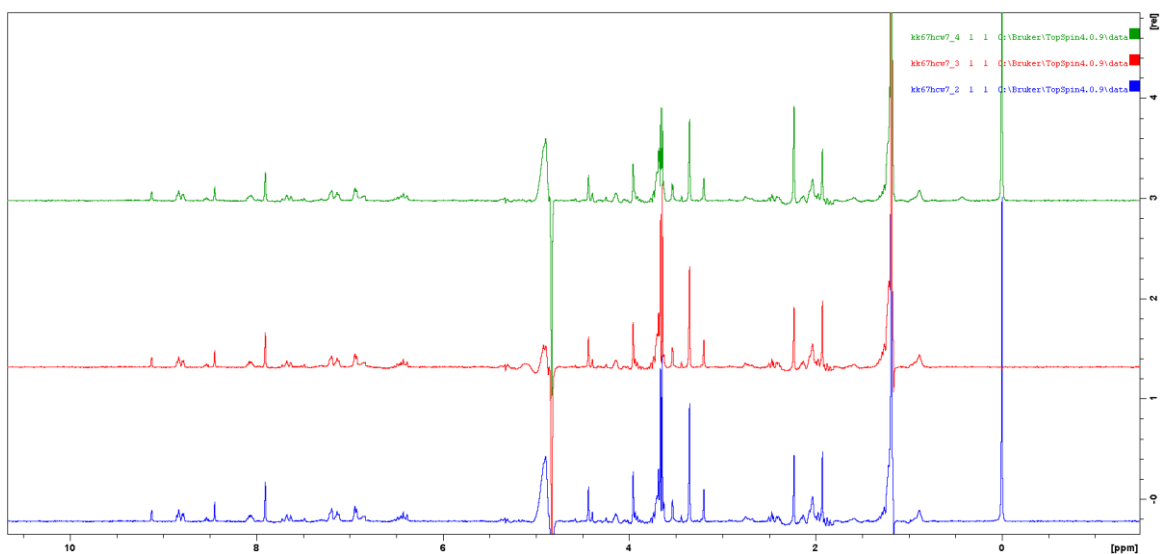

**Figure S23.** <sup>1</sup>H NMR spectra of CW16 (bottom), CW17 (middle), CW18 (top) recorded at 400 MHz.

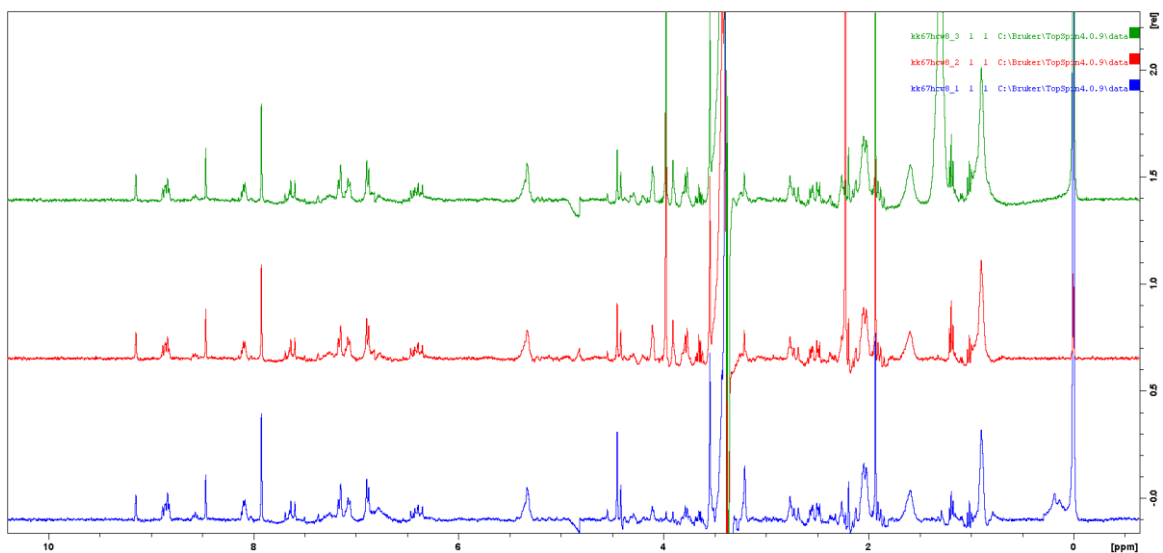

**Figure S24.**  $^1\text{H}$  NMR spectra of CW19 (bottom), CW20 (middle), CW21 (top) recorded at 400 MHz.

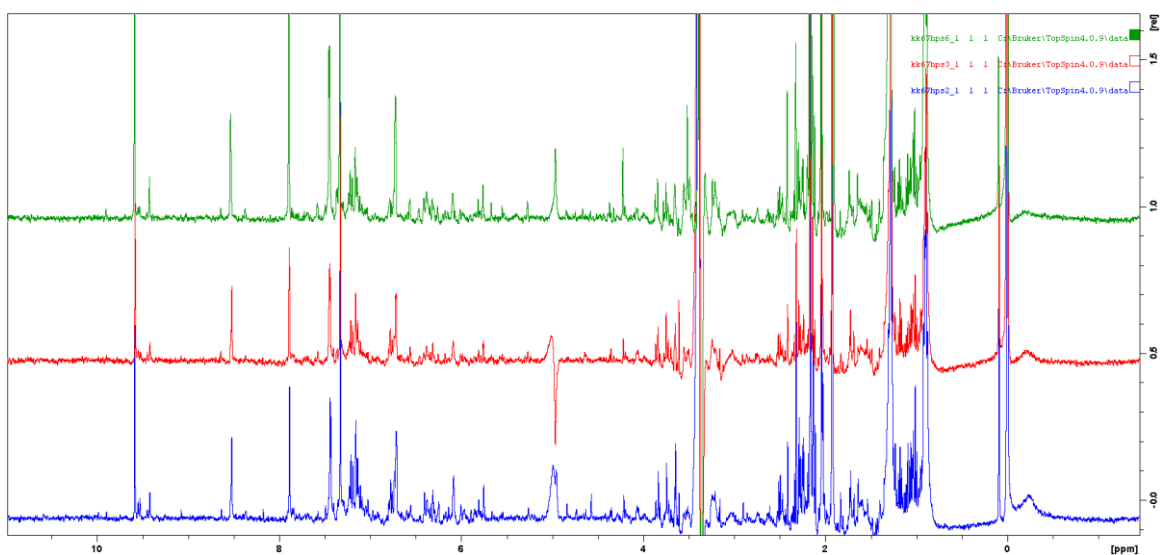

**Figure S25.**  $^1\text{H}$  NMR spectra of PS1 (bottom), PS2 (middle), PS3 (top) recorded at 400 MHz.

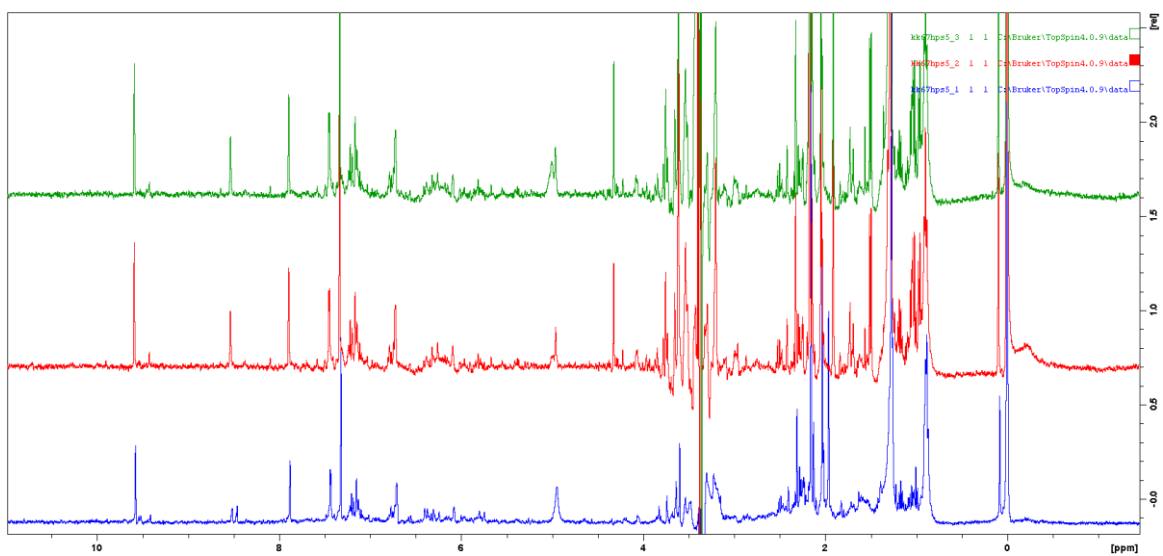

**Figure S26.**  $^1\text{H}$  NMR spectra of PS4 (bottom), PS5 (middle), PS6 (top) recorded at 400 MHz.

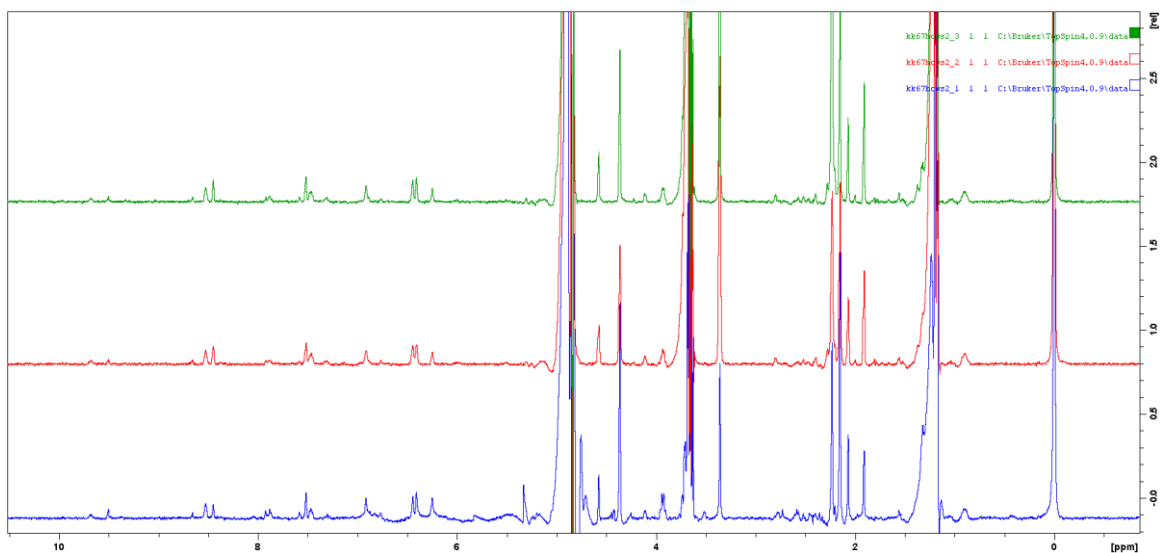

**Figure S27.**  $^1\text{H}$  NMR spectra of CWS1 (bottom), CWS2 (middle), CWS3 (top) recorded at 400 MHz.

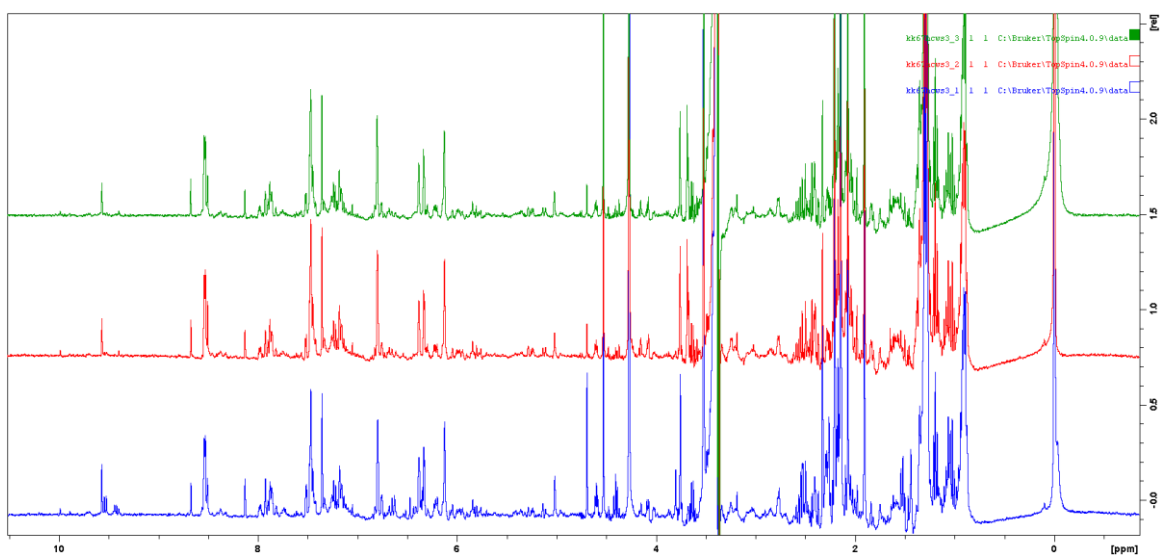

**Figure S28.**  $^1\text{H}$  NMR spectra of CWS4 (bottom), CWS5 (middle), CWS6 (top) recorded at 400 MHz.

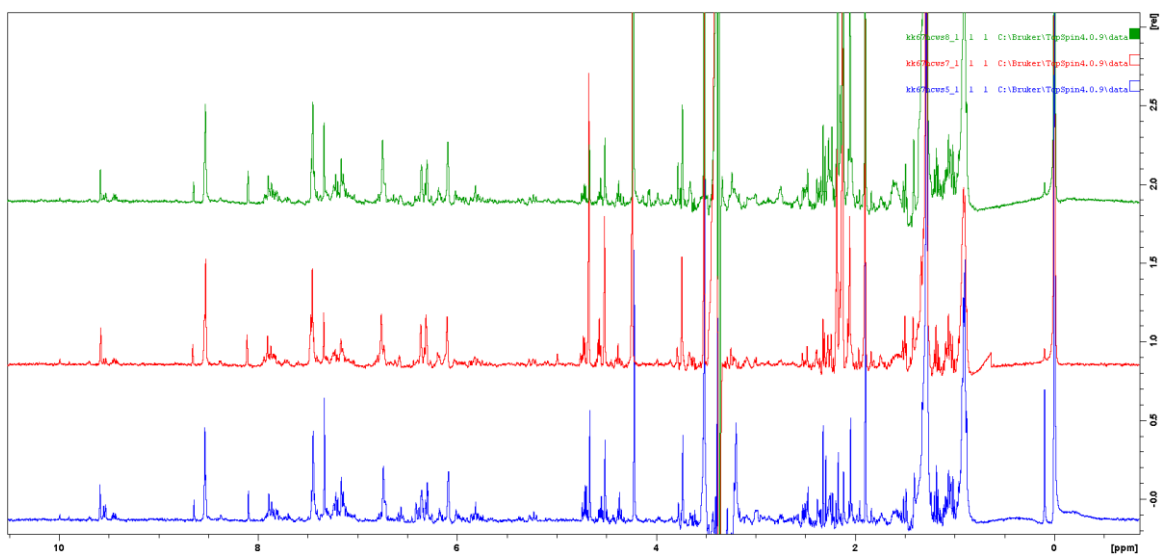

**Figure S29.**  $^1\text{H}$  NMR spectra of CWS7 (bottom), CWS8 (middle), CWS9 (top) recorded at 400 MHz.

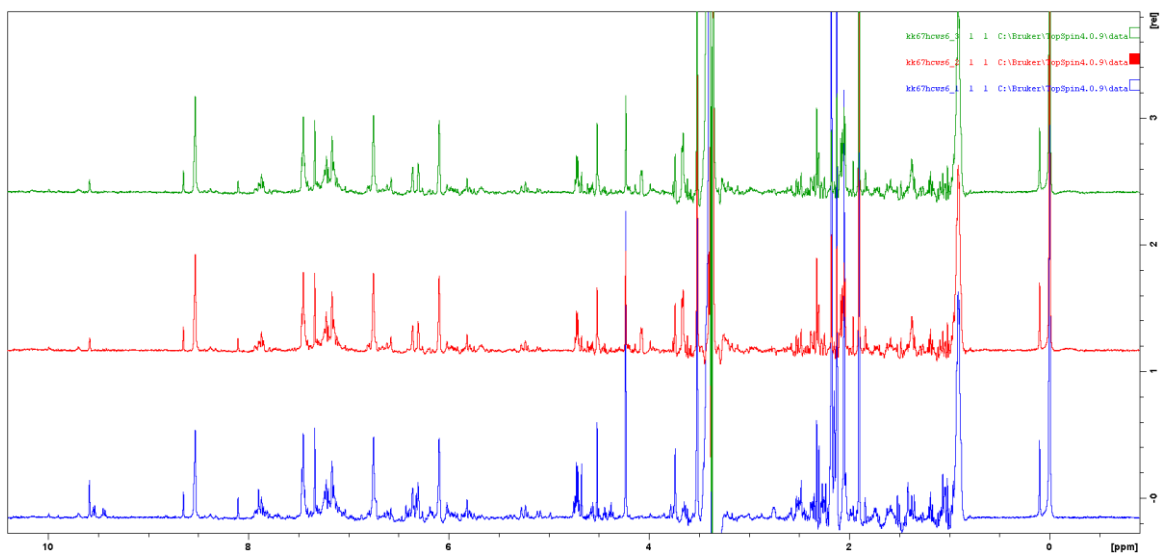

**Figure S30.**  $^1\text{H}$  NMR spectra of CWS10 (bottom), CWS11 (middle), CWS 12 (top) recorded at 400 MHz.

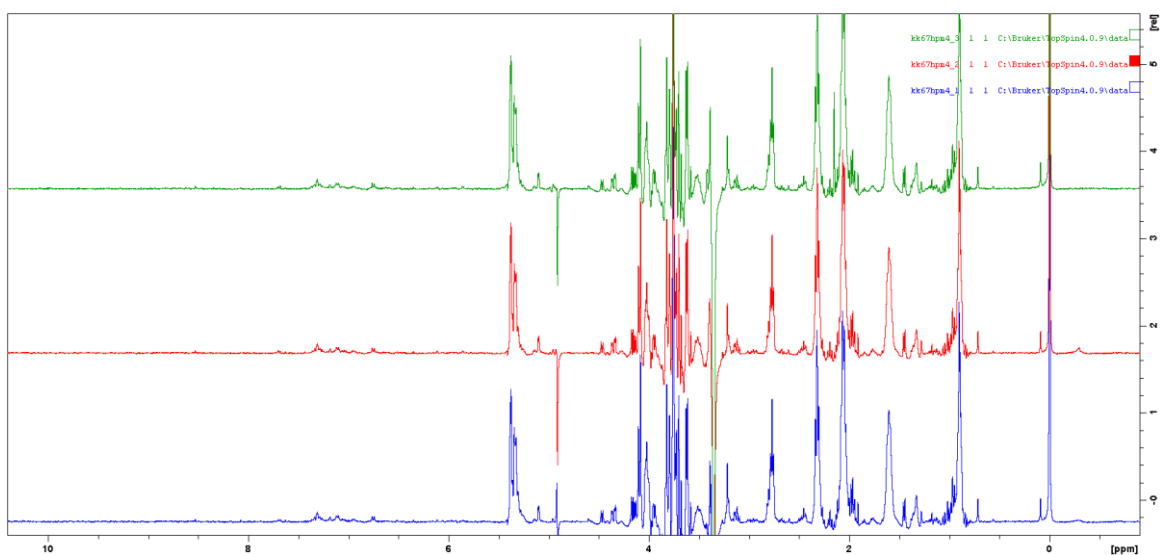

**Figure S31.**  $^1\text{H}$  NMR spectra of IPM1 (bottom), IPM2 (middle), IPM3 (top) recorded at 400 MHz.

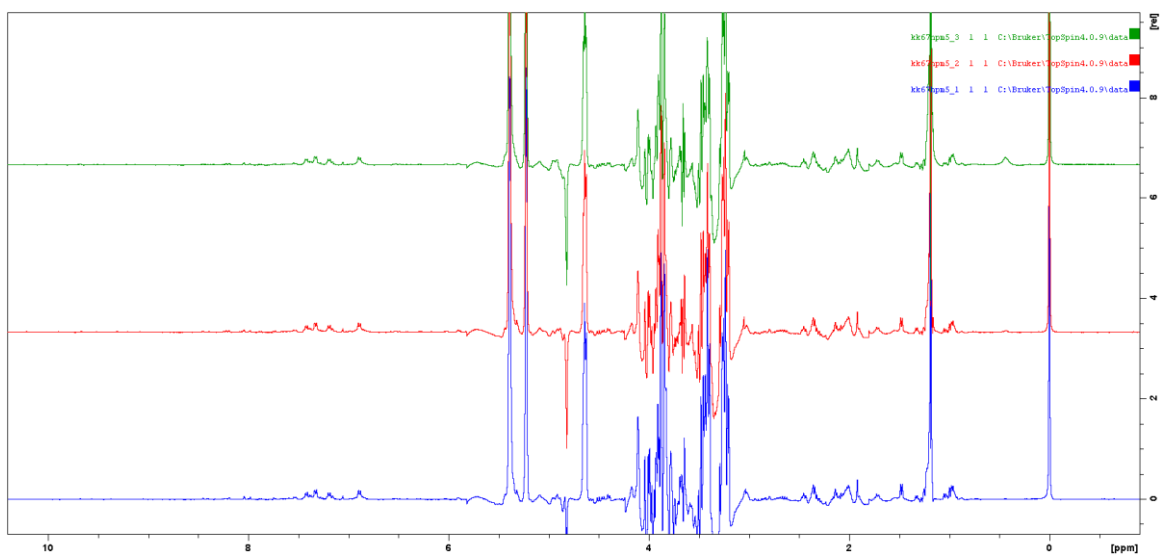

**Figure S32.**  $^1\text{H}$  NMR spectra of IPM4 (bottom), IPM5 (middle), IPM6 (top) recorded at 400 MHz.



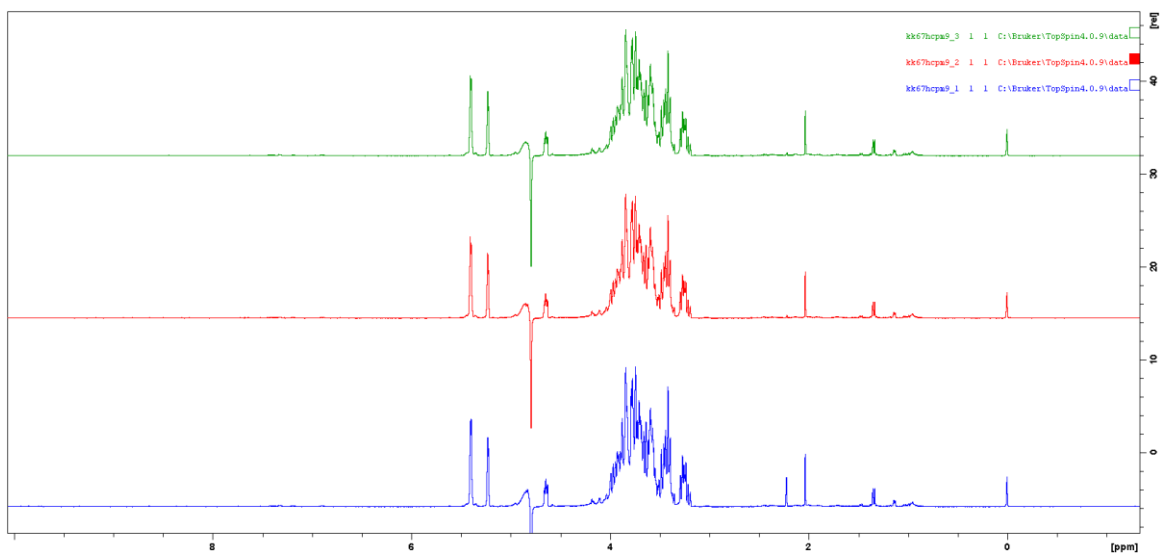

**Figure S33.**  $^1\text{H}$  NMR spectra of CPM1 (bottom), CPM2 (middle), CPM3 (top) recorded at 400 MHz.

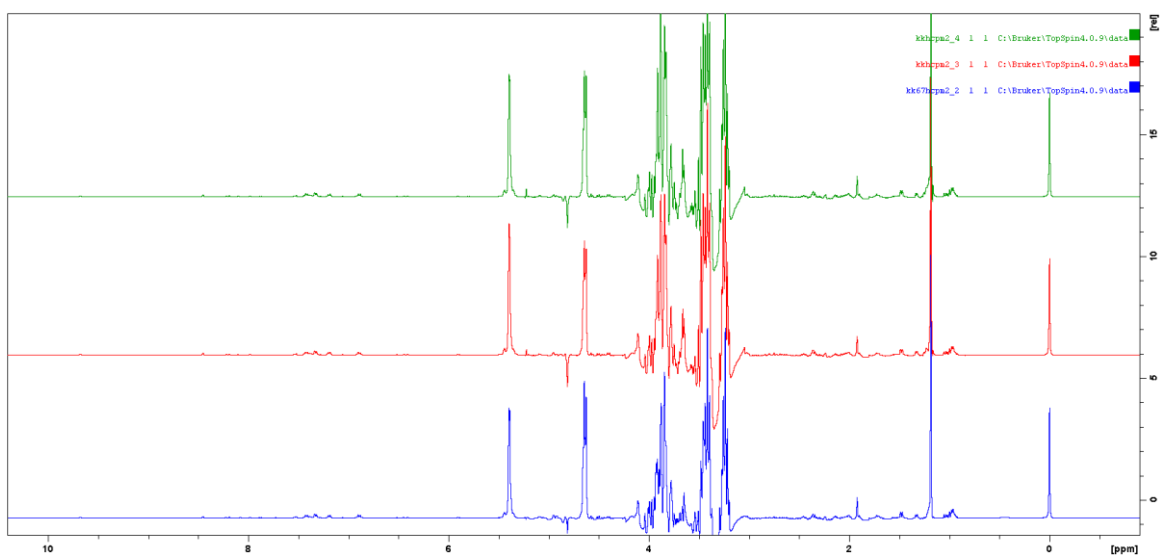

**Figure S34.**  $^1\text{H}$  NMR of CPM4 (bottom), CPM5 (middle), CPM6 (top) recorded at 400 MHz.

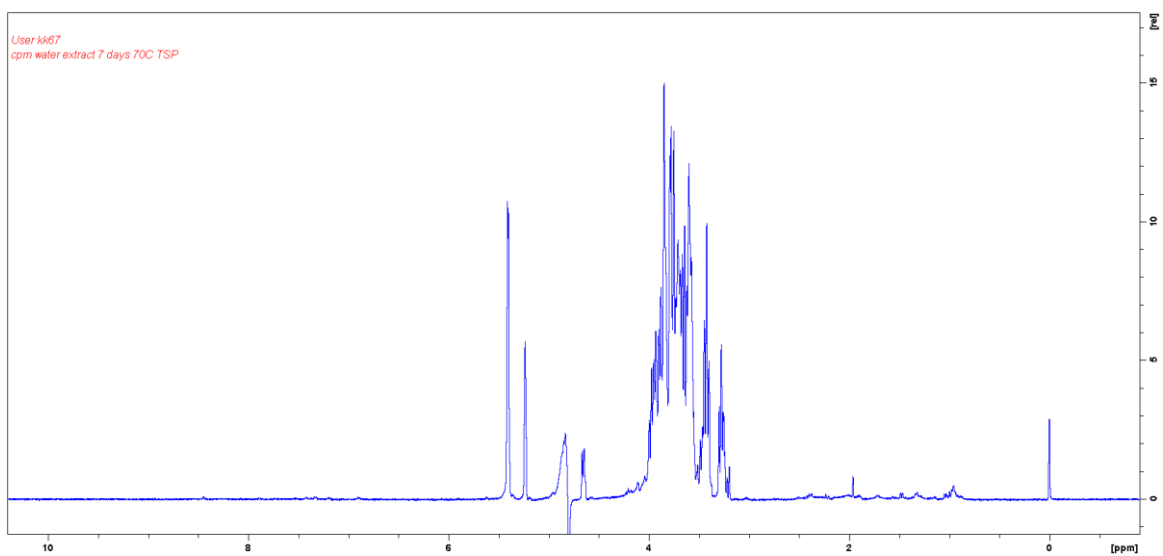

**Figure S35.**  $^1\text{H}$  NMR of CPM7 recorded at 400 MHz.

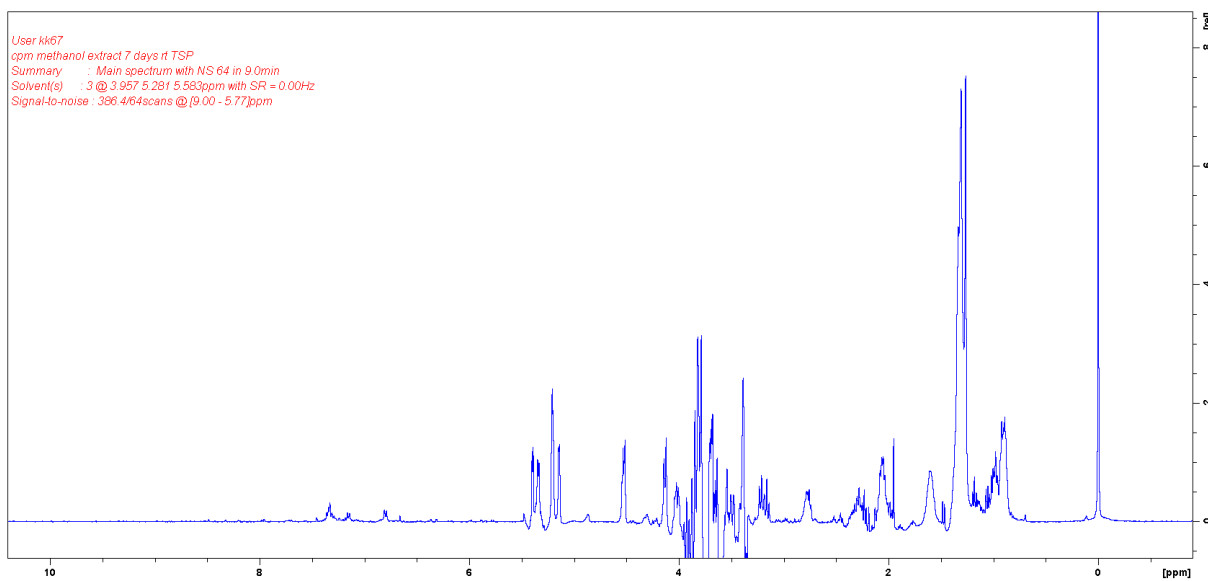

**Figure S36.**  $^1\text{H}$  NMR spectrum of CPM10 recorded at 400 MHz.

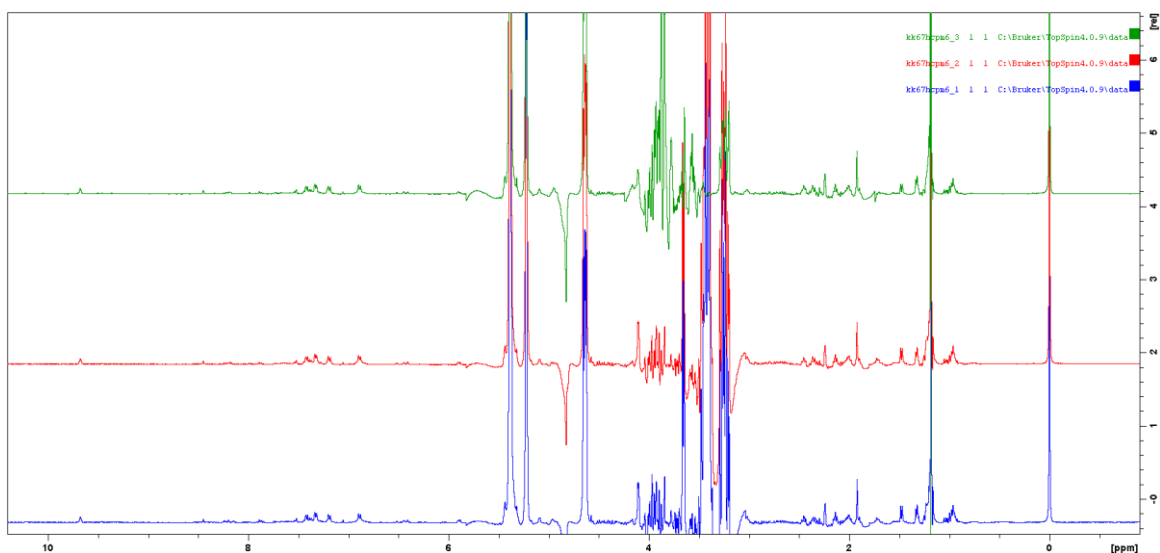

**Figure S37.**  $^1\text{H}$  NMR spectrum of CPM13 (bottom), CPM14 (middle), CPM 15 (top) recorded at 400 MHz.

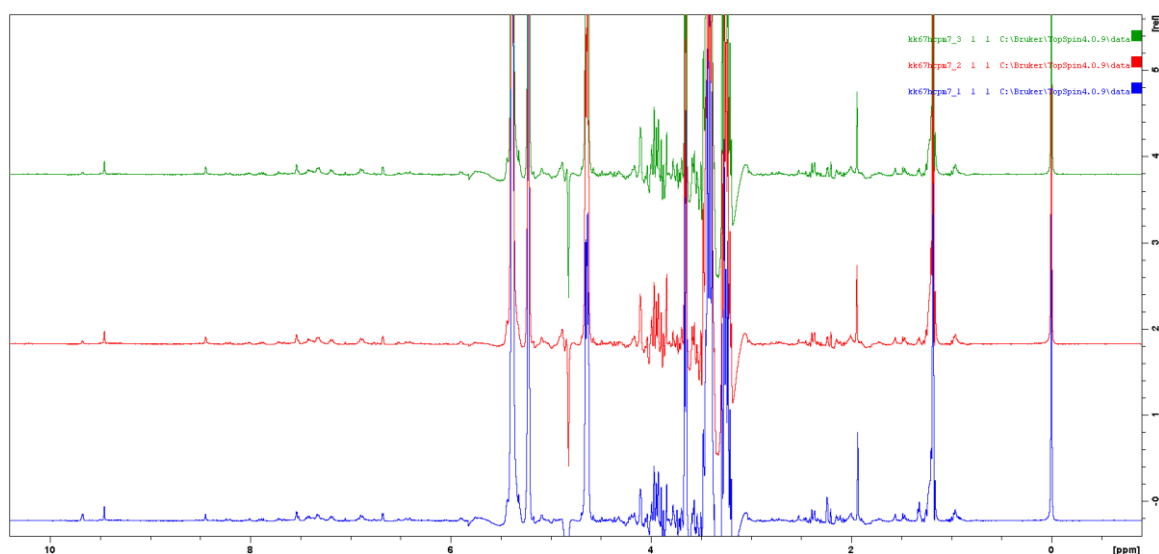

**Figure S38.**  $^1\text{H}$  NMR spectrum of CPM16 (bottom), CPM17 (middle), CPM18 (top) recorded at 400 MHz.

### NMR signal assignment

| $\delta_{\text{H}}$ / ppm | Multiplicity          | Inferences                                                             |
|---------------------------|-----------------------|------------------------------------------------------------------------|
| 0                         | Singlet               | TSP $3\times\text{CH}_3$                                               |
| 0.81                      | Doublet, $J = 4.9$ Hz | Long chain alkanes/ alkenes/alcohols/esters                            |
| 0.85                      | Triplet, $J = 8.0$ Hz | Long chain alkanes $\text{CH}_3$ groups                                |
| 0.88                      | Singlet               | Long chain alkanes/ alkenes/alcohols/esters                            |
| 0.94                      | Multiplet             | Long chain alkanes/ alkenes/alcohols/esters                            |
| 1.00                      | Singlet               | Long chain alkanes/ alkenes/alcohols/esters                            |
| 1.05                      | Doublet, $J = 11$ Hz  | Long chain alkanes/ alkenes/alcohols/esters                            |
| 1.10                      | Doublet, $J = 7.8$ Hz | Long chain alkanes/ alkenes/alcohols/esters                            |
| 1.17                      | Triplet, $J = 6.9$ Hz | Ethylphenol $\text{CH}_3$                                              |
| 1.58                      |                       | Long chain alkanes $\text{CH}_2$ groups                                |
| 2.01                      | Singlet               | Acetic acid/acetate $\text{CH}_3$                                      |
| 2.14                      | Singlet               | Acetone $2\times\text{CH}_3$                                           |
| 2.25                      | Multiplet             | o-cresol $\text{CH}_3$ , p-cresol $\text{CH}_3$                        |
| 2.48                      | Quartet $J = 7.3$ Hz  | Ethylphenol $\text{CH}_3$                                              |
| 3.38                      | Distorted             | Water, methanol $\text{CH}_3$ , suppressed                             |
| 3.73                      | Singlet               | Glycine                                                                |
| 3.88                      | Singlet               | Ferulic acid $\text{OCH}_3$                                            |
| 4.64                      | Singlet               | o-cresol, p-cresol OH                                                  |
| 4.96                      | Distorted             | Methanol OH, suppressed                                                |
| 6.06                      | Singlet               | Long chain alkene CHs                                                  |
| 6.11                      | Singlet               | Long chain alkene CHs                                                  |
| 6.34                      | Doublet, $J = 16$ Hz  | Ferulic acid trans alkene CH                                           |
| 6.75                      | Multiplet             | o-cresol aromatic CH                                                   |
| 6.80                      | Doublet, $J = 8.2$ Hz | Ferulic acid aromatic CH, overlap with o-cresol, p-cresol aromatic CHs |
| 7.05                      | Doublet $J = 7.9$ Hz  | Ferulic acid aromatic CH, overlap with o-cresol, p-cresol aromatic CHs |
| 7.17                      | Singlet               | Ferulic acid aromatic CH                                               |
| 7.58                      | Doublet $J = 16$ Hz   | Ferulic acid trans alkene CH                                           |
| 8.50                      | Singlet               | Formic acid CH, present only in P2 and P3                              |

**Table S21.** Signal assignments for P1, P2, P3.

| $\delta_H$ / ppm | Multiplicity        | Inferences                                      |
|------------------|---------------------|-------------------------------------------------|
| 0                | Singlet             | TSP 3xCH <sub>3</sub>                           |
| 0.83             | Singlet             | Long chain alkanes/ alkenes/alcohols/esters     |
| 0.88             | Multiplet           | Long chain alkanes CH <sub>3</sub> groups       |
| 1.18             | Triplet, J = 7.1 Hz | 2-ethylphenol CH <sub>3</sub>                   |
| 1.26             | Singlet             | Lactic acid CH <sub>3</sub>                     |
| 1.34             | Multiplet           | Long chain alkanes/ alkenes/alcohols/esters     |
| 1.62             | Broad Singlet       | Long chain alkanes CH <sub>2</sub> groups       |
| 1.98             | Singlet             | Acetic acid/acetate CH <sub>3</sub>             |
| 2.05             | Multiplet           | Quinic acid                                     |
| 2.19             | Singlet             | o-cresol CH <sub>3</sub>                        |
| 2.26             | Singlet             | p-cresol CH <sub>3</sub>                        |
| 2.48             | Doublet, J = 11 Hz  | Quinic acid/quinides                            |
| 2.53             | Triplet, J = 7.4 Hz | Quinic acid/quinides                            |
| 3.21             | Singlet             | Choline 3xCH <sub>3</sub>                       |
| 3.39             | Distorted           | Methanol CH <sub>3</sub> , suppressed           |
| 3.89             | Singlet             | Ferulic acid OCH <sub>3</sub>                   |
| 4.44             | Singlet             | Trigonelline CH <sub>3</sub>                    |
| 5.34             | Doublet, J = 5.7 Hz | Carbohydrate CH                                 |
| 5.48             | Singlet             | 4,5 – caffeoylquinic acid                       |
| 5.52             | Doublet, J = 8.7 Hz | Carbohydrate glycosidic linkage CH              |
| 6.34             | Doublet, J = 16 Hz  | Ferulic acid trans alkene CH                    |
| 6.40             | Doublet, J = 16 Hz  | Cinnamic acid trans alkene CH                   |
| 6.82             | Multiplet           | p-cresol, overlap with phenol and 2-ethylphenol |
| 6.99             | Multiplet           | 2-ethylphenol                                   |
| 7.09             | Multiplet           | p-cresol, overlap with phenol an 2-ethylphenol  |
| 7.29             | Singlet             | Phenol aromatic CHs                             |
| 7.58             | Doublet, J = 16 Hz  | Ferulic acid trans alkene CH                    |
| 7.59             | Doublet, J = 16 Hz  | Cinnamic acid trans alkene CH                   |
| 7.89             | Singlet             | Pyridine aromatic CH                            |
| 8.08             | Multiplet           | Trigonelline aromatic CH                        |
| 8.46             | Singlet             | Formic acid CH                                  |
| 8.84             | Doublet, J = 5.9 Hz | N-methylpyridinium aromatic CH                  |
| 8.89             | Doublet, J = 8.2 Hz | Trigonelline aromatic CH                        |
| 9.16             | Singlet             | Trigonelline aromatic CH                        |

**Table S22.** Signal assignment for CW1, CW2, CW3.

| $\delta_H$ / ppm | Multiplicity        | Inferences                                  |
|------------------|---------------------|---------------------------------------------|
| 0                | Singlet             | TSP 3xCH <sub>3</sub>                       |
| 0.83             | Singlet             | Long chain alkanes/ alkenes/alcohols/esters |
| 0.89             | Multiplet           | Long chain alkanes CH <sub>3</sub> groups   |
| 0.97             | Singlet             | Long chain alkanes/ alkenes/alcohols/esters |
| 1.17             | Triplet, J = 7.1 Hz | Ethylphenol CH <sub>3</sub>                 |
| 1.27             | Singlet             | Lactic acid CH <sub>3</sub>                 |
| 1.36             | Singlet             | Long chain alkanes/ alkenes/alcohols/esters |
| 1.50             | Doublet, J = 7.0 Hz | Long chain alkanes/ alkenes/alcohols/esters |
| 1.60             | Broad Singlet       | Long chain alkanes CH <sub>2</sub> groups   |
| 1.94             | Singlet             | Acetic acid/acetate CH <sub>3</sub>         |
| 2.05             | Multiplet           | Quinic acid                                 |

|      |                     |                                                      |
|------|---------------------|------------------------------------------------------|
| 2.12 | Singlet             | Acetone 2xCH <sub>3</sub>                            |
| 2.32 | Triplet, J = 7.4 Hz | Glutamic acid CH <sub>2</sub> , overlap with cresols |
| 2.37 | Triplet, J = 7.3 Hz | Glutamic acid CH <sub>2</sub>                        |
| 2.46 | Doublet, J = 11 Hz  | Quinic acid/quinides                                 |
| 2.56 | Multiplet           | Quinic acid/quinides                                 |
| 3.20 | Singlet             | Choline 3xCH <sub>3</sub>                            |
| 3.35 | Distorted           | Methanol CH <sub>3</sub> , suppressed                |
| 3.52 | Singlet             | Caffeine CH <sub>3</sub>                             |
| 3.71 | Multiplet           | Glutamic acid CH                                     |
| 3.88 | Singlet             | Ferulic acid CH <sub>3</sub>                         |
| 3.96 | Singlet             | Caffeine CH <sub>3</sub>                             |
| 4.42 | Singlet             | Trigonelline CH <sub>3</sub>                         |
| 5.33 | Doublet, J = 7.6 Hz | Carbohydrate CH                                      |
| 6.28 | Doublet, J = 16 Hz  | Ferulic acid trans alkene CH                         |
| 6.29 | Doublet, J = 16 Hz  | Cinnamic acid trans alkene CH                        |
| 6.33 | Singlet             | Caffeic acid                                         |
| 6.76 | Multiplet           | Overlapping p-cresol, o-cresol, ethylphenol          |
| 6.93 | Multiplet           | Overlapping o-cresol, p-cresol                       |
| 7.04 | Multiplet           | Overlapping p-cresol, o-cresol, ethylphenol          |
| 7.05 | Singlet             | Ferulic acid aromatic CH                             |
| 7.31 | Singlet             | Caffeic acid                                         |
| 7.55 | Doublet, J = 16 Hz  | Ferulic acid trans alkene CH                         |
| 7.57 | Doublet, J = 16 Hz  | Cinnamic acid trans alkene CH                        |
| 7.85 | Singlet             | Caffeine CH                                          |
| 8.06 | Multiplet           | Trigonelline aromatic CH                             |
| 8.50 | Singlet             | Formic acid CH                                       |
| 8.84 | Doublet, J = 6.2 Hz | N-methylpyridinium aromatic CH                       |
| 8.89 | Doublet, J = 6.7 Hz | Trigonelline aromatic CH                             |
| 9.19 | Singlet             | Trigonelline aromatic CH                             |

**Table S23.** Signal assignment for CW13, CW14, CW15.

| $\delta_H$ / ppm | Multiplicity        | Inferences                                            |
|------------------|---------------------|-------------------------------------------------------|
| 0                | Singlet             | TSP 3xCH <sub>3</sub>                                 |
| 0.89             | Multiplet           | Long chain alkanes CH <sub>3</sub> groups             |
| 1.01             | Triplet, J = 7.4 Hz | Long chain alkanes/ alkenes/alcohols/esters           |
| 1.09             | Triplet, J = 7.3 Hz | Long chain alkanes/ alkenes/alcohols/esters           |
| 1.18             | Triplet, J = 7.0 Hz | 4-ethylphenol CH <sub>3</sub>                         |
| 1.28             | Multiplet           | Long chain alkanes CH <sub>2</sub> groups             |
| 1.64             | Singlet             | Squalene                                              |
| 1.68             | Singlet             | Squalene                                              |
| 2.04             | Singlet             | Acetic acid/acetate CH <sub>3</sub>                   |
| 2.16             | Singlet             | Acetone 2xCH <sub>3</sub>                             |
| 2.19             | Singlet             | Hydroxyacetone CH <sub>3</sub>                        |
| 2.24             | Multiplet           | o-Cresol CH <sub>3</sub> , overlap with other signals |
| 2.27             | Singlet             | p-Cresol CH <sub>3</sub>                              |
| 2.32             | Singlet             | Toluene CH <sub>3</sub>                               |
| 2.41             | Singlet             | 5-methylfurfural CH <sub>3</sub>                      |
| 2.50             | Quartet, J = 7.4 Hz | 4-ethylphenol CH <sub>2</sub>                         |
| 3.38             | Distorted           | Methanol CH <sub>3</sub> suppressed                   |
| 3.60             | Singlet             | Levogluconan CH                                       |

|      |                                             |                                                                     |
|------|---------------------------------------------|---------------------------------------------------------------------|
| 3.64 | Multiplet                                   | Levogluconan CH                                                     |
| 3.74 | Singlet                                     | Guaiacol OCH <sub>3</sub> , overlap with levogluconan CH            |
| 4.06 | Doublet, J = 6.6 Hz                         | Levogluconan CH                                                     |
| 4.21 | Singlet                                     | Hydroxyacetone CH <sub>2</sub>                                      |
| 4.57 | Singlet                                     | Benzyl alcohol CH <sub>2</sub>                                      |
| 4.99 | Broad singlet                               | Methanol OH, suppressed                                             |
| 5.80 | Singlet                                     | Long chain alkenes CH                                               |
| 6.24 | Singlet                                     | 5-methylfurfural aromatic CH                                        |
| 6.55 | Multiplet                                   | 5-HMF aromatic CH                                                   |
| 6.71 | Doublet of doublets, J = 3.5 Hz, J = 1.5 Hz | Furfural aromatic CH                                                |
| 6.73 | Multiplet                                   | Phenol aromatic CH                                                  |
| 6.76 | Multiplet                                   | Overlapping phenol, 4-ethylphenol, guaiacols, cresols               |
| 7.04 | Multiplet                                   | 4-ethylphenol aromatic CH                                           |
| 7.08 | Singlet                                     | Guaiacol derivative                                                 |
| 7.11 | Doublet, J = 7.7                            | Phenol aromatic CH, overlap with <i>o</i> -Cresol, <i>p</i> -Cresol |
| 7.15 | Singlet                                     | 5-methylfurfural, overlap with toluene                              |
| 7.20 | Doublet, J = 7.1 Hz                         | 5-methylfurfural                                                    |
| 7.32 | Singlet                                     | Benzyl alcohol, overlap with 3-methylpyridazine                     |
| 7.44 | Doublet, J = 3.6 Hz                         | Furfural aromatic CH                                                |
| 7.49 | Singlet                                     | Naphthalene aromatic CH                                             |
| 7.88 | Singlet                                     | Furfural, overlap with naphthalene                                  |
| 8.52 | Singlet                                     | Pyridine aromatic CH                                                |
| 9.07 | Singlet                                     | 3-methylpyridazine CH                                               |
| 9.42 | Singlet                                     | Hydroxyacetaldehyde CHO                                             |
| 9.54 | Doublet, J = 7.0 Hz                         | 5-HMF CHO, overlap with 5-methylfurfural CHO                        |
| 9.58 | Singlet                                     | Furfural CHO                                                        |

**Table S24.** Signal assignment for PS1, PS2, PS3.

| $\delta_H$ / ppm | Multiplicity        | Inferences                                                    |
|------------------|---------------------|---------------------------------------------------------------|
| 0                | Singlet             | TSP 3xCH <sub>3</sub>                                         |
| 0.91             | Multiplet           | Long chain alkanes CH <sub>3</sub> groups                     |
| 1.03             | Triplet, J = 7.5 Hz | Long chain alkanes/ alkenes/alcohols/esters                   |
| 1.06             | Triplet, J = 7.0 Hz | Long chain alkanes/ alkenes/alcohols/esters                   |
| 1.20             | Triplet, J = 7.0 Hz | 4-ethylphenol CH <sub>3</sub>                                 |
| 1.28             | Singlet             | Long chain alkanes CH <sub>2</sub> groups                     |
| 1.30             | Doublet, J = 5.2 Hz | Long chain alkanes CH <sub>2</sub> groups                     |
| 1.35             | Singlet             | Methylglyoxal CH <sub>3</sub>                                 |
| 1.44             | Singlet             | Squalene                                                      |
| 1.52             | Singlet             | Squalene                                                      |
| 2.08             | Singlet             | Acetic acid/acetate CH <sub>3</sub>                           |
| 2.10             | Singlet             | Ethyl acetate isolated CH <sub>3</sub>                        |
| 2.15             | Singlet             | Acetone 2xCH <sub>3</sub>                                     |
| 2.21             | Singlet             | Hydroxyacetone CH <sub>3</sub>                                |
| 2.27             | Singlet             | <i>p</i> -Cresol CH <sub>3</sub>                              |
| 2.33             | Singlet             | Toluene CH <sub>3</sub>                                       |
| 2.41             | Multiplet           | 5-methylfurfural CH <sub>3</sub> , overlap with other signals |
| 2.43             | Singlet             | Methylpyridine/methylpyrazine CH <sub>3</sub>                 |
| 2.51             | Multiplet           | Methylpyridine/methylpyrazine CH <sub>3</sub> , overlapping   |
| 2.56             | Multiplet           | 4-ethylphenol, overlapping with other signals                 |

|      |                     |                                                                              |
|------|---------------------|------------------------------------------------------------------------------|
| 3.39 | Distorted           | Methanol CH <sub>3</sub> suppressed                                          |
| 3.68 | Multiplet           | Levogluconan CH                                                              |
| 3.76 | Singlet             | Guaiacol OCH <sub>3</sub> , overlap with levogluconan                        |
| 3.81 | Singlet             | Guaiacol derivative OCH <sub>3</sub>                                         |
| 4.08 | Multiplet           | Levogluconan CH                                                              |
| 4.15 | Singlet             | Hydroxyacetone CH <sub>2</sub>                                               |
| 4.53 | Singlet             | Benzyl alcohol CH <sub>2</sub>                                               |
| 5.12 | Doublet, J = 11 Hz  | Vinylguaiacol alkene CH                                                      |
| 5.80 | Singlet             | Long chain alkenes CH                                                        |
| 5.84 | Singlet             | Long chain alkenes CH                                                        |
| 6.13 | Singlet             | Long chain alkenes CH                                                        |
| 6.21 | Multiplet           | 5-methylfurfural CH                                                          |
| 6.33 | Doublet, J = 2.9 Hz | 2-methylfuran CH                                                             |
| 6.38 | Multiplet           | 2-methylfuran                                                                |
| 6.64 | Doublet, J = 9.3 Hz | 5-HMF CH                                                                     |
| 6.76 | Doublet, J = 3.5 Hz | Furfural CH                                                                  |
| 6.80 | Singlet             | Overlapping <i>p</i> -cresol, <i>o</i> -cresol, guaiacol derivatives, phenol |
| 7.05 | Multiplet           | 4-ethylphenol aromatic CH                                                    |
| 7.12 | Multiplet           | Phenol CH                                                                    |
| 7.18 | Multiplet           | 5-methylfurfural, overlap with toluene                                       |
| 7.36 | Singlet             | Benzyl alcohol aromatic CHs, overlap with                                    |
| 7.47 | Multiplet           | 2-methylfuran, overlap with 2-methylpyridine                                 |
| 7.52 | Doublet, J = 3.5 Hz | Furfural aromatic CH                                                         |
| 7.62 | Triplet, J = 7.1 Hz | Benzaldehyde aromatic CH                                                     |
| 7.74 | Triplet, J = 5.4 Hz | Benzaldehyde aromatic CH                                                     |
| 7.88 | Multiplet           | Overlapping 5-HMF, 2-methylpyridine, naphthalene                             |
| 7.93 | Singlet             | Furfural aromatic CH, overlap with benzaldehyde                              |
| 8.13 | Singlet             | Dimethylpyrazine                                                             |
| 8.51 | Singlet             | 2-methylpyrazine aromatic CH                                                 |
| 8.54 | Doublet, J = 4.6 Hz | 2-methylpyridine, 2-methylpyrazine aromatic CH                               |
| 9.42 | Triplet, J = 8.3 Hz | Hydroxyacetaldehyde CHO                                                      |
| 9.54 | Doublet, J = 7.6 Hz | 5-HMF CHO overlap with 5-methylfurfural CHO                                  |
| 9.57 | Singlet             | Furfural CHO                                                                 |
| 9.89 | Singlet             | Vanilin CHO                                                                  |
| 9.99 | Singlet             | Benzaldehyde CHO                                                             |

**Table S25.** Signal assignment for CWS4, CWS5, CWS6.

| $\delta_H$ / ppm | Multiplicity        | Inferences                                  |
|------------------|---------------------|---------------------------------------------|
| 0                | Singlet             | TSP 3xCH <sub>3</sub>                       |
| 0.90             | Multiplet           | Long chain alkanes CH <sub>3</sub> groups   |
| 1.02             | Triplet, J = 7.5 Hz | Long chain alkanes/ alkenes/alcohols/esters |
| 1.05             | Multiplet           | Long chain alkanes/ alkenes/alcohols/esters |
| 1.19             | Triplet, J = 7.0 Hz | 4-ethylphenol CH <sub>3</sub>               |
| 1.28             | Multiplet           | Long chain alkanes CH <sub>2</sub> groups   |
| 1.41             | Singlet             | Squalene                                    |
| 1.49             | Singlet             | Squalene                                    |
| 2.05             | Singlet             | Acetic acid/acetate CH <sub>3</sub>         |
| 2.06             | Singlet             | Ethyl acetate isolated CH <sub>3</sub>      |
| 2.12             | Singlet             | Hydroxyacetone CH <sub>3</sub>              |

|      |                                                |                                                                       |
|------|------------------------------------------------|-----------------------------------------------------------------------|
| 2.17 | Singlet                                        | Acetone 2xCH <sub>3</sub>                                             |
| 2.23 | Singlet                                        | <i>o</i> -cresol CH <sub>3</sub>                                      |
| 2.30 | Singlet                                        | <i>p</i> -cresol CH <sub>3</sub>                                      |
| 2.32 | Singlet                                        | Toluene CH <sub>3</sub>                                               |
| 2.47 | Singlet                                        | Methylpyridines/methylpyrazines CH <sub>3</sub>                       |
| 2.51 | Multiplet                                      | Methylpyridines/methylpyrazines CH <sub>3</sub>                       |
| 2.53 | Singlet                                        | 2-methylpyridine CH <sub>3</sub>                                      |
| 3.38 | Distorted                                      | Methanol CH <sub>3</sub> suppressed                                   |
| 3.62 | Doublet, J = 6.9 Hz                            | Levogluconan CH                                                       |
| 3.73 | Singlet                                        | Guaiacol OCH <sub>3</sub> overlap with levogluconan CH                |
| 3.78 | Singlet                                        | Levogluconan CH                                                       |
| 3.96 | Multiplet                                      | Levogluconan CH                                                       |
| 4.52 | Singlet                                        | Benzyl alcohol CH <sub>2</sub>                                        |
| 5.80 | Doublet, J = 3.9 Hz                            | Long chain alkene CHs                                                 |
| 5.81 | Singlet                                        | Long chain alkene CHs                                                 |
| 6.09 | Multiplet                                      | Long chain alkene CHs                                                 |
| 6.30 | Doublet, J = 3.0 Hz                            | 2-methylfuran CH                                                      |
| 6.36 | Doublet, J = 2.2 Hz                            | 2-methylfuran CH                                                      |
| 6.58 | Doublet, J = 9.4 Hz                            | 5-HMF aromatic CH                                                     |
| 6.72 | Doublet of doublets,<br>J = 3.6 Hz, J = 1.8 Hz | Furfural aromatic CH                                                  |
| 6.74 | Multiplet                                      | Phenol aromatic CH                                                    |
| 6.78 | Multiplet                                      | Overlapping <i>p</i> -cresol, <i>o</i> -cresol, phenol, 4-ethylphenol |
| 7.04 | Multiplet                                      | Overlapping <i>p</i> -cresol, guaiacol derivatives, 4-ethylphenol     |
| 7.11 | Multiplet                                      | Overlapping <i>o</i> -cresol, guaiacol derivatives, phenol            |
| 7.16 | Singlet                                        | 5-methylfurfural, overlap with toluene                                |
| 7.22 | Singlet                                        | 2-methylpyridine CH                                                   |
| 7.34 | Singlet                                        | Benzyl alcohol aromatic CHs                                           |
| 7.45 | Multiplet                                      | Overlapping 2-methylfuran, furfural                                   |
| 7.84 | Singlet                                        | Pyridine aromatic CH                                                  |
| 7.86 | Singlet                                        | Naphthalene aromatic CH                                               |
| 7.89 | Singlet                                        | Furfural aromatic CH                                                  |
| 7.93 | Multiplet                                      | Benzaldehyde                                                          |
| 8.53 | Singlet                                        | Pyridine aromatic CH, 2 methylpyridine overlap                        |
| 8.64 | Singlet                                        | Methylpyridine/methylpyrazine                                         |
| 9.54 | Singlet                                        | 5-methylfurfural CHO                                                  |
| 9.55 | Singlet                                        | 5-HMF CHO                                                             |
| 9.59 | Singlet                                        | Furfural CHO                                                          |
| 9.70 | Multiplet                                      | Syringaldehyde CHO                                                    |
| 9.90 | Singlet                                        | Vanilin CHO                                                           |
| 9.99 | Singlet                                        | Benzaldehyde CHO                                                      |

**Table S26.** Signal assignment for CWS7, CWS8, CWS9.

| $\delta_H$ / ppm | Multiplicity        | Inferences                                |
|------------------|---------------------|-------------------------------------------|
| 0                | Singlet             | TSP 3xCH <sub>3</sub>                     |
| 0.98             | Multiplet           | Long chain alkanes CH <sub>3</sub> groups |
| 1.18             | Distorted           | Ethanol CH <sub>3</sub> suppressed        |
| 1.33             | Doublet, J = 6.5 Hz | Lactic acid CH <sub>3</sub>               |
| 1.92             | Singlet             | Acetic acid/acetate CH <sub>3</sub>       |
| 2.08             | Multiplet           | Cresol CH <sub>3</sub>                    |



|      |                     |                                       |
|------|---------------------|---------------------------------------|
| 2.34 | Multiplet           | Cresol CH <sub>3</sub>                |
| 2.46 | Triplet, J = 8.6 Hz | Ethylphenol CH <sub>2</sub>           |
| 3.23 | Triplet, J = 8.4 Hz | Beta glucose CH                       |
| 3.27 | Multiplet           | Glucose/mannose CH                    |
| 3.42 | Triplet, J = 8.7 Hz | Sucrose CH                            |
| 3.86 | Distorted           | Ethanol CH <sub>2</sub> suppressed    |
| 3.90 | Singlet             | Carbohydrate CH                       |
| 3.91 | Singlet             | Carbohydrate CH                       |
| 3.96 | Doublet, J = 9.4 Hz | Carbohydrate CH                       |
| 4.00 | Doublet, J = 5.5 Hz | Carbohydrate CH                       |
| 4.04 | Singlet             | Carbohydrate CH                       |
| 4.11 | Singlet             | Carbohydrate CH                       |
| 4.63 | Doublet, J = 7.5 Hz | Beta glucose/mannose anomeric CH      |
| 4.64 | Doublet, J = 8.0 Hz | Beta glucose/mannose anomeric CH      |
| 5.22 | Doublet, J = 2.8 Hz | Alpha glucose anomeric CH             |
| 5.39 | Doublet, J = 2.7 Hz | Sucrose glycosidic linkage CH         |
| 6.89 | Doublet, J = 8.0 Hz | Phenol, overlap with <i>p</i> -cresol |
| 7.19 | Doublet, J = 8.0 Hz | Phenol, overlap with <i>p</i> -cresol |
| 7.38 | Doublet, J = 6.9 Hz | Flavonoids                            |
| 7.42 | Doublet, J = 7.1 Hz | Flavonoids                            |
| 7.54 | Doublet, J = 9.0 Hz | Flavonoids                            |
| 7.74 | Doublet, J = 7.7 Hz | Flavonoids                            |
| 7.98 | Singlet             | Flavonoids                            |
| 8.04 | Singlet             | Pyridine/pyrazine derivative          |
| 8.19 | Singlet             | Pyridine/pyrazine derivative          |
| 8.45 | Singlet             | Pyridine/pyrazine derivative          |

**Table S27.** Signal assignment for IPM4, IMP5, IPM6.

| $\delta_H$ / ppm | Multiplicity        | Inferences                                |
|------------------|---------------------|-------------------------------------------|
| 0                | Singlet             | TSP 3xCH <sub>3</sub>                     |
| 0.96             | Multiplet           | Long chain alkanes CH <sub>3</sub> groups |
| 1.18             | Distorted           | Ethanol CH <sub>3</sub> suppressed        |
| 1.32             | Doublet, J = 4.7 Hz | Lactic acid CH <sub>3</sub>               |
| 1.93             | Singlet             | Acetic acid/ acetate CH <sub>3</sub>      |
| 2.08             | Singlet             | Cresol CH <sub>3</sub>                    |
| 2.20             | Singlet             | Acetone 2xCH <sub>3</sub>                 |
| 2.24             | Singlet             | Acetaldehyde CH <sub>3</sub>              |
| 2.46             | Doublet, J = 2.8 Hz | Ethylphenol CH <sub>2</sub>               |
| 3.23             | Triplet, J = 8.3 Hz | Beta glucose CH                           |
| 3.27             | Triplet, J = 8.5 Hz | Glucose/mannose CH                        |
| 3.41             | Triplet, J = 9.1 Hz | Sucrose CH                                |
| 3.66             | Doublet, J = 6.8 Hz | Carbohydrate CH                           |
| 3.86             | Distorted           | Ethanol CH <sub>2</sub> suppressed        |
| 3.90             | Singlet             | Carbohydrate CH                           |
| 3.93             | Singlet             | Carbohydrate CH                           |
| 3.97             | Triplet, J = 8.9 Hz | Carbohydrate CH                           |
| 4.10             | Doublet, J = 5.5 Hz | Carbohydrate CH                           |
| 4.63             | Doublet, J = 7.4 Hz | Beta glucose/mannose anomeric CH          |
| 4.64             | Doublet, J = 8.0 Hz | Beta glucose/mannose anomeric CH          |
| 5.22             | Doublet, J = 3.2 Hz | Alpha glucose anomeric CH                 |

|      |                     |                                       |
|------|---------------------|---------------------------------------|
| 5.39 | Doublet, J = 3.4 Hz | Sucrose glycosidic linkage CH         |
| 6.41 | Singlet             | 2-methylfuran                         |
| 6.44 | Singlet             | 2-methylfuran                         |
| 6.68 | Doublet, J = 3.3 Hz | Furfural CH                           |
| 6.89 | Doublet, J = 8.4 Hz | Phenol, overlap with <i>p</i> -cresol |
| 7.19 | Doublet, J = 8.0 Hz | Phenol, overlap with <i>p</i> -cresol |
| 7.42 | Doublet, J = 7.2 Hz | Flavonoids                            |
| 7.52 | Singlet             | Flavonoids                            |
| 7.54 | Doublet, J = 3.2 Hz | Furfural CH                           |
| 7.73 | Doublet, J = 7.7 Hz | Flavonoids                            |
| 7.88 | Doublet, J = 7.9 Hz | Flavonoids                            |
| 7.91 | Singlet             | Furfural CH                           |
| 8.01 | Singlet             | Pyridine/pyrazine derivatives         |
| 8.20 | Multiplet           | Pyridine/pyrazine derivatives         |
| 8.24 | Singlet             | Pyridine/pyrazine derivatives         |
| 8.45 | Singlet             | Pyridine/pyrazine derivatives         |
| 9.46 | Singlet             | Furfural CHO                          |
| 9.68 | Doublet, J = 2.8 Hz | Acetaldehyde CHO                      |

**Table S28.** Signal assignment for CPM16, CPM17, CPM18

### Thermogravimetric analysis

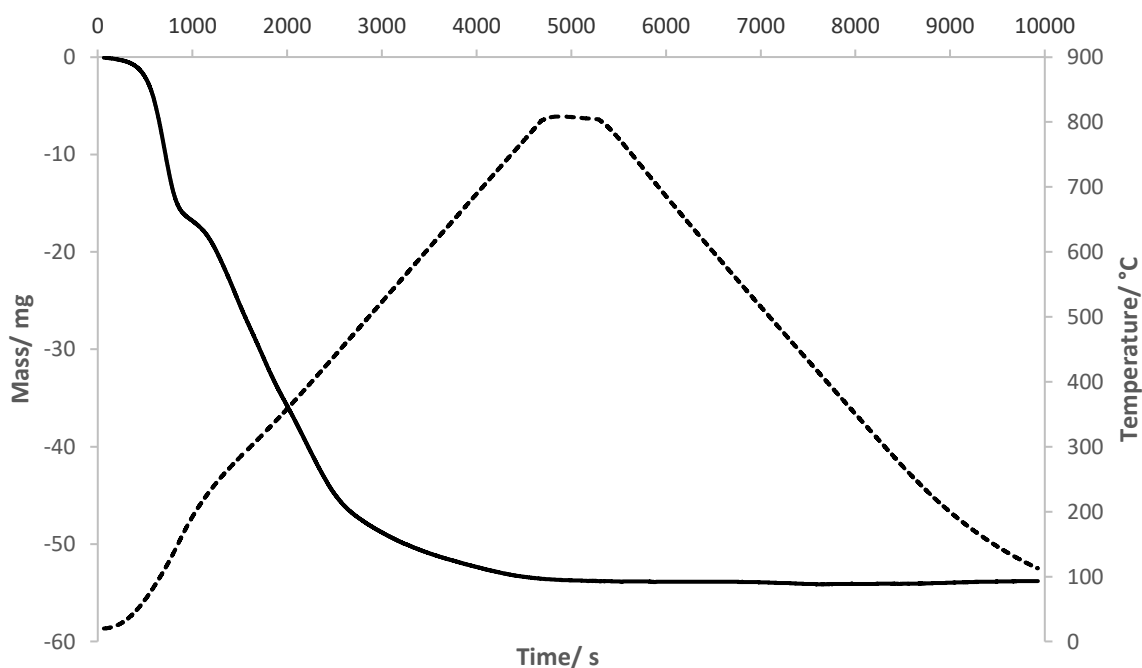

**Figure S39.** TGA data for peat sample. Solid line is mass (mg) against time (s), dotted line is temperature (°C) against time (s).

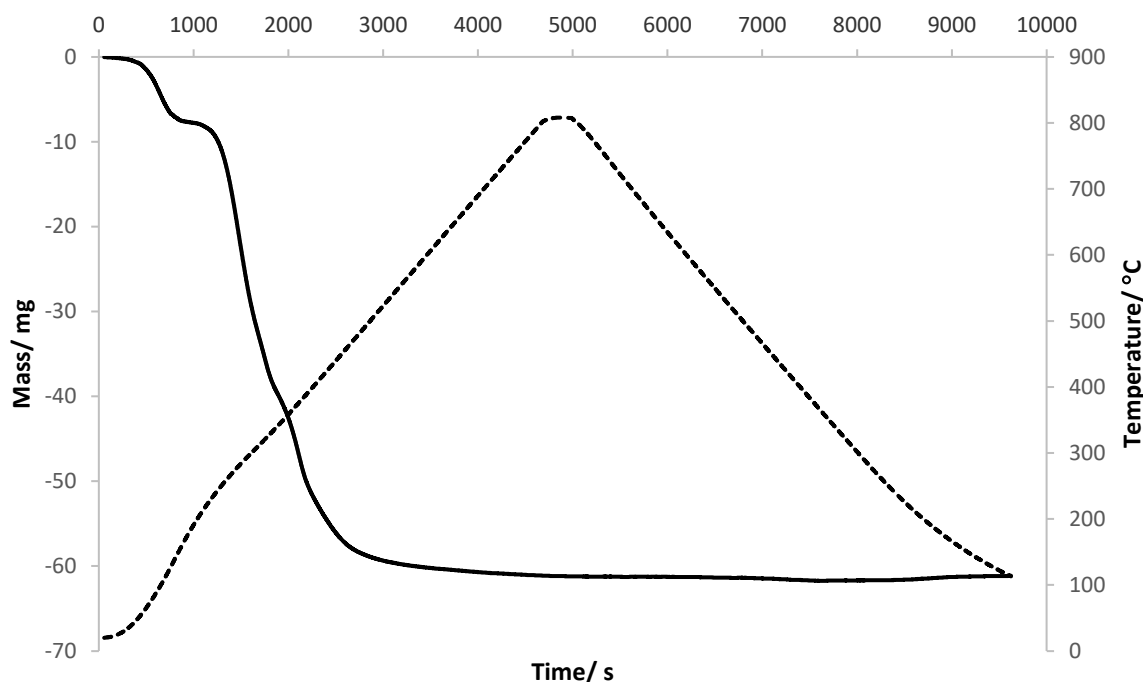

**Figure S40.** TGA data for spent coffee grounds. Solid line is mass (mg) against time (s), dotted line is temperature ( $^{\circ}\text{C}$ ) against time (s).

### Pyrolysis - Gas Chromatography/Mass Spectrometry

| Component RT (mins) | Compound Name                           | Match Factor (%) | Molecular Formula | Component Area | Library File | Total area  | Compound %  | Stdva      | CV%      |
|---------------------|-----------------------------------------|------------------|-------------------|----------------|--------------|-------------|-------------|------------|----------|
| 66.20166687         | Stigmastan-3,5-diene                    | 90.9829884       | C29H48            | 4654316.148    | NIST14.L     | 381456681.4 | 1.220142778 | 273796.563 | 5.882638 |
| 62.85195835         | Squalene                                | 97.64731317      | C30H50            | 4448940.419    | NIST14.L     | 381456681.4 | 1.166302921 | 29660.1408 | 0.708255 |
| 2.908294933         | Toluene                                 | 98.22116701      | C7H8              | 2635175.525    | NIST14.L     | 238342058.8 | 1.105627575 | 88708.3405 | 2.383897 |
| 9.226297765         | 3-Methylpyridazine                      | 94.77178725      | C5H6N2            | 4187776.123    | NIST14.L     | 381456681.4 | 1.097837927 | 180856.206 | 6.863156 |
| 32.63351764         | .beta.-D-Glucopyranose, 1,6-anhydro-    | 89.45095624      | C6H10O5           | 3721148.237    | NIST14.L     | 381456681.4 | 0.975510043 | 66791.8635 | 2.248798 |
| 69.02551425         | .gamma.-Sitosterol                      | 88.41623864      | C29H50O           | 2795371.419    | NIST14.L     | 381456681.4 | 0.732814905 | 126681.328 | 4.531825 |
| 4.177502827         | Furfural                                | 96.60810416      | C5H4O2            | 2647670.14     | NIST14.L     | 381456681.4 | 0.694094577 | 104531.422 | 3.948053 |
| 13.12959273         | p-Cresol                                | 94.35235121      | C7H8O             | 2575825.992    | NIST14.L     | 381456681.4 | 0.675260421 | 114299.781 | 4.437403 |
| 71.20598595         | 1-Decanol, 2-hexyl-                     | 82.89560501      | C16H34O           | 2495826.874    | NIST14.L     | 381456681.4 | 0.654288415 | 114105.872 | 4.571866 |
| 9.283459567         | Phenol                                  | 88.0963478       | C6H6O             | 2207481.799    | NIST14.L     | 381456681.4 | 0.578697899 | 78734.3208 | 3.918489 |
| 72.31851004         | 1-Heneicosanol                          | 91.00486606      | C21H44O           | 2009302.908    | NIST14.L     | 381456681.4 | 0.526744715 | 53350.9674 | 2.792799 |
| 23.24884163         | Ethanone, 1-(2-hydroxy-5-methylphenyl)- | 93.41281053      | C9H10O2           | 1910304.571    | NIST14.L     | 381456681.4 | 0.500792007 | 82783.3729 | 5.079118 |
| 57.80470481         | Behenic alcohol                         | 96.12863074      | C22H46O           | 1876088.824    | NIST14.L     | 381456681.4 | 0.491822248 | 37909.0909 | 2.411978 |
| 57.80577812         | 1-Docosene                              | 94.88682061      | C22H44            | 1781551.767    | NIST14.L     | 381456681.4 | 0.467039078 | 66781.5018 | 4.292509 |
| 54.54281269         | Tricosane                               | 94.32590536      | C23H48            | 1629876.998    | NIST14.L     | 381456681.4 | 0.427277087 | 51697.2293 | 3.357916 |

|             |                                  |             |          |             |                        |             |             |            |          |
|-------------|----------------------------------|-------------|----------|-------------|------------------------|-------------|-------------|------------|----------|
| 31.86481133 | Guanidine, methyl-               | 83.07343929 | C2H7N3   | 1629109.525 | NIST14.L               | 381456681.4 | 0.427075892 | 2879.92854 | 0.188592 |
| 57.94406137 | Hexacosane                       | 94.40478508 | C26H54   | 1571701.111 | NIST14.L               | 381456681.4 | 0.412026106 | 28226.8681 | 1.851119 |
| 47.50839024 | n-Hexadecanoic acid              | 95.52141659 | C16H32O2 | 1555768.418 | NIST14.L               | 381456681.4 | 0.407849304 | 5450.70519 | 0.367035 |
| 56.20522762 | 1-Nonadecene                     | 94.59355285 | C19H38   | 1527070.659 | NIST14.L               | 381456681.4 | 0.400326101 | 30376.4575 | 2.072245 |
| 56.20539002 | 1-Octadecanol                    | 94.31216782 | C18H38O  | 1524854.226 | NIST14.L               | 381456681.4 | 0.399745056 | 12057.5193 | 0.874088 |
| 52.53950402 | 1-Eicosanol                      | 97.09106393 | C20H42O  | 1485064.32  | NIST14.L               | 381456681.4 | 0.389314015 | 35646.7603 | 2.705312 |
| 19.74393448 | Benzofuran, 2,3-dihydro-         | 86.9909605  | C8H8O    | 1465871.93  | LIGNOCELLULOSIC 2019.L | 381456681.4 | 0.384282673 | 1376.55394 | 0.110378 |
| 17.91495783 | 2-Methoxy-5-methylphenol         | 90.71244499 | C8H10O2  | 1379440.667 | NIST14.L               | 381456681.4 | 0.361624461 | 9556.40512 | 0.795479 |
| 60.93931994 | n-Heptadecanol-1                 | 94.54644529 | C17H36O  | 1317658.133 | NIST14.L               | 381456681.4 | 0.345427986 | 41370.3262 | 3.943463 |
| 5.659571231 | Styrene                          | 92.1750442  | C8H8     | 1247131.079 | NIST14.L               | 381456681.4 | 0.32693911  | 29512.7997 | 2.905837 |
| 13.30740445 | Mequinol                         | 96.41746512 | C7H8O2   | 1201339.601 | NIST14.L               | 381456681.4 | 0.314934738 | 30161.0912 | 3.04008  |
| 17.93083067 | Phenol, 2-methoxy-4-methyl-      | 90.02378522 | C8H10O2  | 1185634.324 | LIGNOCELLULOSIC 2019.L | 381456681.4 | 0.310817553 | 28814.4038 | 3.195158 |
| 67.69076117 | Tetracosane                      | 88.09018839 | C24H50   | 1049086.173 | NIST14.L               | 381456681.4 | 0.275021051 | 8900.50015 | 0.992322 |
| 21.72194075 | Phenol, 4-ethyl-2-methoxy-       | 96.35620884 | C9H12O2  | 1015638.526 | NIST14.L               | 381456681.4 | 0.266252651 | 12397.4532 | 1.394845 |
| 66.44331598 | Heneicosane                      | 90.51871805 | C21H44   | 992114.9234 | NIST14.L               | 381456681.4 | 0.260085869 | 14518.8599 | 1.665506 |
| 54.54261097 | Octacosane                       | 93.80645197 | C28H58   | 988178.2871 | NIST14.L               | 381456681.4 | 0.259053868 | 3816.32587 | 0.441431 |
| 8.153865195 | 2-Furancarboxaldehyde, 5-methyl- | 86.50254483 | C6H6O2   | 901814.7335 | NIST14.L               | 381456681.4 | 0.236413406 | 2439.20384 | 0.282489 |
| 61.23527603 | 2-Pentacosanone                  | 85.78416705 | C25H50O  | 896936.6841 | NIST14.L               | 381456681.4 | 0.235134611 | 14452.6361 | 1.720154 |
| 62.43510922 | Dodecyl nonyl ether              | 86.60211561 | C21H44O  | 888805.1281 | NIST14.L               | 381456681.4 | 0.2330029   | 11468.4871 | 1.438697 |
| 45.40954533 | Nonadecane                       | 96.14747665 | C19H40   | 871738.5453 | NIST14.L               | 381456681.4 | 0.228528844 | 4150.66619 | 0.524107 |
| 68.29981188 | Stigmasterol                     | 84.2841983  | C29H48O  | 864535.8467 | NIST14.L               | 381456681.4 | 0.226640635 | 2562.64668 | 0.341136 |
| 3.46768513  | 2-Amino-oxazole                  | 83.91079534 | C3H4N2O  | 863469.5202 | NIST14.L               | 381456681.4 | 0.226361095 | 8883.80738 | 1.207701 |
| 52.53332423 | 1-Hexadecanol                    | 97.09143412 | C16H34O  | 841970.2891 | NIST14.L               | 381456681.4 | 0.220725008 | 8743.0246  | 1.328954 |
| 52.65413074 | Docosane                         | 95.67017335 | C22H46   | 840194.493  | NIST14.L               | 381456681.4 | 0.220259477 | 8893.40076 | 1.381798 |
| 13.33171996 | Phenol, 2-methoxy-               | 95.43963259 | C7H8O2   | 832149.1732 | NIST14.L               | 381456681.4 | 0.218150373 | 12600.3301 | 2.005901 |
| 12.18993561 | Phenol, 2-methyl-                | 94.16390007 | C7H8O    | 797144.1106 | NIST14.L               | 381456681.4 | 0.208973692 | 11317.7252 | 1.815906 |
| 68.7513789  | 16-Hentriacontanone              | 85.3953551  | C31H62O  | 791949.6127 | NIST14.L               | 381456681.4 | 0.207611939 | 14461.9331 | 2.410565 |
| 41.97090627 | Octadecane                       | 96.87403059 | C18H38   | 751210.2929 | NIST14.L               | 381456681.4 | 0.196932006 | 14852.8582 | 2.551014 |
| 14.33180001 | Levogluconone                    | 92.46547978 | C6H6O3   | 735596.8134 | NIST14.L               | 381456681.4 | 0.192838886 | 11367.2646 | 2.138878 |
| 63.82718133 | Hexadecane                       | 86.68932177 | C16H34   | 716480.2192 | NIST14.L               | 381456681.4 | 0.187827414 | 10881.4771 | 2.455293 |

|             |                                              |             |           |             |                        |             |             |            |          |
|-------------|----------------------------------------------|-------------|-----------|-------------|------------------------|-------------|-------------|------------|----------|
| 5.006249488 | Benzene, 1,3-dimethyl-                       | 94.54502839 | C8H10     | 657887.7483 | NIST14.L               | 381456681.4 | 0.172467224 | 10156.0288 | 2.311172 |
| 62.10173392 | Tetracosanoic acid                           | 85.17727678 | C24H48O2  | 643610.9714 | NIST14.L               | 381456681.4 | 0.168724524 | 12545.8033 | 2.919245 |
| 48.0569705  | 9-Eicosene, (E)-                             | 96.26026006 | C20H40    | 628163.0059 | NIST14.L               | 381456681.4 | 0.164674794 | 13302.0352 | 3.114663 |
| 17.20776256 | Phenol, 4-ethyl-                             | 88.70188903 | C8H10O    | 623255.1134 | NIST14.L               | 381456681.4 | 0.163388176 | 16016.138  | 3.782598 |
| 31.96972364 | Acetic acid                                  | 85.61584253 | C2H4O2    | 614855.2682 | LIGNOCELLULOSIC 2019.L | 381456681.4 | 0.161186132 | 16127.2934 | 3.875219 |
| 48.2262575  | Eicosane                                     | 96.26557542 | C20H42    | 599939.5004 | NIST14.L               | 381456681.4 | 0.157275919 | 13587.1341 | 3.392079 |
| 62.38955402 | Formic acid, undecyl ester                   | 81.25086033 | C12H24O2  | 590875.1498 | NIST14.L               | 381456681.4 | 0.154899672 | 12694.539  | 3.34227  |
| 38.4862303  | Heptadecane                                  | 95.30062564 | C17H36    | 582233.4662 | NIST14.L               | 381456681.4 | 0.152634229 | 12581.2526 | 3.371412 |
| 9.535591447 | Oxazolidine, 2,2-diethyl-3-methyl-           | 84.05647615 | C8H17NO   | 553627.4443 | NIST14.L               | 381456681.4 | 0.145135076 | 12253.6165 | 3.367082 |
| 62.43338726 | Oxalic acid, allyl octadecyl ester           | 82.27561722 | C23H42O4  | 547908.6226 | NIST14.L               | 381456681.4 | 0.14363587  | 11008.6481 | 3.129783 |
| 52.05644574 | Octadecanoic acid                            | 91.05805207 | C18H36O2  | 531459.139  | NIST14.L               | 381456681.4 | 0.139323589 | 9994.20916 | 2.941376 |
| 16.20758901 | Phenol, 3,4-dimethyl-                        | 80.4826499  | C8H10O    | 474369.6068 | NIST14.L               | 381456681.4 | 0.124357399 | 8552.38548 | 2.571805 |
| 9.186458586 | Cyclopropane, 1-hexyl-2-methyl-              | 86.95002234 | C10H20    | 443184.4818 | NIST14.L               | 381456681.4 | 0.116182126 | 4362.26628 | 1.345792 |
| 57.86305373 | 5-Eicosene, (E)-                             | 87.73207894 | C20H40    | 431356.4434 | NIST14.L               | 381456681.4 | 0.113081371 | 4852.96788 | 1.541764 |
| 24.98377928 | Phenol, 2,6-dimethoxy-                       | 90.21852464 | C8H10O3   | 427077.8067 | NIST14.L               | 381456681.4 | 0.111959713 | 2731.14705 | 0.874371 |
| 30.6745369  | n-Tridecan-1-ol                              | 93.96486168 | C13H28O   | 423416.3565 | NIST14.L               | 381456681.4 | 0.110999853 | 3703.50634 | 1.195819 |
| 61.00427914 | 1-Iodoundecane                               | 83.1688353  | C11H23I   | 423251.9382 | NIST14.L               | 381456681.4 | 0.11095675  | 1147.67507 | 0.381656 |
| 2.192383122 | Furan, 2,5-dimethyl-                         | 87.09375156 | C6H8O     | 419725.2657 | NIST14.L               | 381456681.4 | 0.110032223 | 7377.85346 | 2.584156 |
| 30.67444523 | 1-Tridecene                                  | 93.27682209 | C13H26    | 416164.7158 | NIST14.L               | 381456681.4 | 0.109098814 | 6179.10951 | 2.16607  |
| 4.801248387 | Ethylbenzene                                 | 92.2160456  | C8H10     | 400554.8099 | NIST14.L               | 381456681.4 | 0.105006631 | 174.854451 | 0.062293 |
| 18.28440375 | Decane                                       | 89.03466668 | C10H22    | 363923.9248 | NIST14.L               | 381456681.4 | 0.095403736 | 21908.3488 | 7.860781 |
| 55.7818388  | Eicosanoic acid                              | 88.91224896 | C20H40O2  | 351738.374  | NIST14.L               | 381456681.4 | 0.092209258 | 20217.8848 | 7.322933 |
| 56.28729901 | Sulfurous acid, 2-ethylhexyl isohexyl ester  | 89.71224605 | C14H30O3S | 351679.0066 | NIST14.L               | 381456681.4 | 0.092193694 | 19720.2375 | 7.261787 |
| 30.98337363 | Undecane, 4,7-dimethyl-                      | 93.83413385 | C13H28    | 339780.042  | NIST14.L               | 381456681.4 | 0.089074345 | 20538.4104 | 7.592754 |
| 18.79628622 | 1,4:3,6-Dianhydro- $\alpha$ -D-glucopyranose | 84.66017119 | C6H8O4    | 332544.0808 | NIST14.L               | 381456681.4 | 0.087177417 | 2924.27156 | 1.08571  |
| 26.94394589 | Tetradecane                                  | 89.98601759 | C14H30    | 324141.0889 | NIST14.L               | 381456681.4 | 0.084974547 | 4409.27324 | 1.644215 |
| 62.44545329 | Borane, diethyl(decyloxy)-                   | 81.1443389  | C14H31BO  | 320180.1607 | NIST14.L               | 381456681.4 | 0.083936178 | 18168.6661 | 7.152681 |
| 41.96744223 | Tridecane, 2-methyl-                         | 90.51410409 | C14H30    | 315955.3357 | NIST14.L               | 381456681.4 | 0.082828628 | 5932.89214 | 2.397628 |
| 67.65337543 | 1-[1,2,4]Triazol-1-ylethanone                | 82.51581111 | C4H5N3O   | 314767.1985 | NIST14.L               | 381456681.4 | 0.082517154 | 2567.8197  | 1.057533 |
| 22.69842704 | Tridecane                                    | 91.33438069 | C13H28    | 312355.7725 | NIST14.L               | 381456681.4 | 0.081884992 | 3877.03585 | 1.599844 |

|             |                                                       |             |          |             |                        |             |             |            |          |
|-------------|-------------------------------------------------------|-------------|----------|-------------|------------------------|-------------|-------------|------------|----------|
| 57.80679885 | Pentane, 2-isocyano-2,4,4-trimethyl-                  | 81.08329533 | C9H17N   | 311199.4716 | NIST14.L               | 381456681.4 | 0.081581864 | 1806.00237 | 0.780586 |
| 51.51778625 | 11-Hexadecen-1-ol, (Z)-1,3,5,7-Cyclooctatetraene      | 80.54579031 | C16H32O  | 309704.6291 | NIST14.L               | 381456681.4 | 0.081189987 | 21720.7007 | 9.833324 |
| 5.59883192  | 1-Tetradecene                                         | 83.28945709 | C8H8     | 300709.5317 | NIST14.L               | 381456681.4 | 0.078831895 | 13089.813  | 6.414766 |
| 26.6124489  | Heptane, 4-methylene-                                 | 93.88118985 | C14H28   | 286166.7715 | NIST14.L               | 381456681.4 | 0.075019468 | 18104.1781 | 9.064943 |
| 3.302902541 | 1-Undecene, 5-methyl-                                 | 87.58217915 | C8H16    | 285503.4345 | NIST14.L               | 381456681.4 | 0.074845572 | 11657.2592 | 6.317314 |
| 39.55886592 | 2-Bromotetradecane                                    | 87.8230804  | C12H24   | 285268.212  | NIST14.L               | 381456681.4 | 0.074783908 | 8765.01074 | 4.941679 |
| 59.50456824 | Octane                                                | 87.6507392  | C14H29Br | 282024.8784 | NIST14.L               | 381456681.4 | 0.073933658 | 8535.61166 | 4.937308 |
| 9.529096078 | Pyridine                                              | 89.38532963 | C8H18    | 281727.4087 | NIST14.L               | 381456681.4 | 0.073855675 | 16298.5166 | 9.972036 |
| 2.635174669 | 1-Pentadecene                                         | 82.95883138 | C5H5N    | 280698.2407 | NIST14.L               | 381456681.4 | 0.073585876 | 7641.68344 | 5.045301 |
| 30.67586851 | Furan, 2-methyl-                                      | 94.9005809  | C15H30   | 280682.0695 | NIST14.L               | 381456681.4 | 0.073581637 | 5930.14394 | 3.94366  |
| 4.148076521 | Tridecane, 6-methyl-                                  | 87.55766565 | C5H6O    | 278704.4763 | NIST14.L               | 381456681.4 | 0.073063205 | 1995.64293 | 1.40959  |
| 63.81725529 | Benzene, 1-ethyl-2-methyl-                            | 86.55211389 | C14H30   | 276256.2269 | NIST14.L               | 381456681.4 | 0.072421389 | 515.442294 | 0.365246 |
| 7.95997177  | Cyclopropane, octyl-                                  | 88.76765573 | C9H12    | 276089.9804 | NIST14.L               | 381456681.4 | 0.072377807 | 1241.75114 | 0.908213 |
| 13.42262785 | 1,4-Benzenedicarboxylic acid, bis(2-ethylhexyl) ester | 95.38379893 | C11H22   | 271561.7684 | NIST14.L               | 381456681.4 | 0.071190723 | 1082.49887 | 0.830655 |
| 61.66167991 | 1,15-Pentadecanediol                                  | 89.68533297 | C24H38O4 | 270713.704  | NIST14.L               | 381456681.4 | 0.0709684   | 11515.2411 | 9.562252 |
| 51.50522812 | 1,2,4,5-Tetrazine                                     | 81.88480629 | C15H32O2 | 270679.3603 | NIST14.L               | 381456681.4 | 0.070959397 | 1535.34095 | 1.361178 |
| 4.147277961 | Tetradecane, 4-methyl-                                | 85.21311085 | C2H2N4   | 270500.1442 | NIST14.L               | 381456681.4 | 0.070912415 | 2799.50391 | 2.539714 |
| 30.99095947 | 1-Undecene                                            | 85.40941082 | C15H32   | 270236.1463 | NIST14.L               | 381456681.4 | 0.070843207 | 9049.52118 | 8.229606 |
| 13.42224024 | Ethanone, 1-(3-hydroxy-4-methoxyphenyl)-              | 95.36405886 | C11H22   | 269341.7905 | NIST14.L               | 381456681.4 | 0.070608749 | 9551.65524 | 9.051769 |
| 30.54933708 | 1-Decanol                                             | 88.27126882 | C9H10O3  | 268168.9777 | LIGNOCELLULOSIC 2019.L | 381456681.4 | 0.070301293 | 10325.3481 | 9.796628 |
| 9.187300582 | m-Aminophenylacetylene                                | 90.0018239  | C10H22O  | 255570.3412 | NIST14.L               | 381456681.4 | 0.066998523 | 9566.55377 | 9.124004 |
| 22.42121556 | 1,4-Benzenediol, 2-methoxy-                           | 84.18036448 | C8H7N    | 254011.9559 | NIST14.L               | 381456681.4 | 0.066589987 | 9815.19613 | 9.620384 |
| 21.19315633 | 1-Dodecene                                            | 81.07118925 | C7H8O3   | 247448.4428 | NIST14.L               | 381456681.4 | 0.064869343 | 7290.57658 | 7.424443 |
| 30.67902128 | 2-Hepten-4-one, 6-methyl-                             | 93.81577608 | C12H24   | 246332.1188 | NIST14.L               | 381456681.4 | 0.064576695 | 6649.27557 | 6.886551 |
| 76.23815471 | 1H-Indene, 1-methyl-                                  | 81.88243432 | C8H14O   | 242812.164  | NIST14.L               | 381456681.4 | 0.063653929 | 6707.54813 | 6.998957 |
| 15.68324334 | Undecane, 3,8-dimethyl-                               | 82.91436202 | C10H10   | 242338.3946 | NIST14.L               | 381456681.4 | 0.063529729 | 5057.45729 | 5.489196 |
| 59.50754705 | Ethane, 1,1-difluoro-                                 | 80.6219317  | C13H28   | 240498.2553 | NIST14.L               | 381456681.4 | 0.063047331 | 5818.71702 | 6.378609 |
| 2.914923625 | Decane, 2,9-dimethyl-                                 | 86.7621437  | C2H4F2   | 231364.8239 | NIST14.L               | 381456681.4 | 0.060652975 | 5391.35575 | 6.154528 |
| 48.22086822 | Bi-2-cyclohexen-1-yl                                  | 92.64169854 | C12H26   | 231061.7825 | NIST14.L               | 381456681.4 | 0.060573531 | 4092.86057 | 4.674397 |
| 2.584272522 |                                                       | 87.51590132 | C12H18   | 227673.8677 | NIST14.L               | 381456681.4 | 0.059685379 | 4070.63757 | 0.684992 |

|             |                                             |             |           |             |                         |             |             |            |          |
|-------------|---------------------------------------------|-------------|-----------|-------------|-------------------------|-------------|-------------|------------|----------|
| 31.00069476 | Undecane, 5,7-dimethyl-                     | 89.34963801 | C13H28    | 221175.564  | NIST14.L                | 381456681.4 | 0.05798183  | 4048.41457 | 0.668645 |
| 5.924823106 | Nonane                                      | 90.46321289 | C9H20     | 220888.6818 | NIST14.L                | 381456681.4 | 0.057906623 | 4026.19157 | 0.668947 |
| 23.2597775  | N-Acetyl-4-hydroxyphenylacetamide           | 81.13225676 | C10H11NO3 | 219630.8783 | NIST14.L                | 381456681.4 | 0.057576886 | 4003.96857 | 0.685526 |
| 34.54211238 | 1-Undecanol                                 | 94.13530953 | C11H24O   | 206297.7755 | NIST14.L                | 381456681.4 | 0.054081573 | 3981.74557 | 0.66958  |
| 13.79928485 | Undecane                                    | 86.60796986 | C11H24    | 204057.5296 | NIST14.L                | 381456681.4 | 0.053494286 | 3959.52257 | 0.660264 |
| 15.68493281 | 5-Hepten-2-one, 7-phenyl-                   | 80.8447115  | C13H16O   | 202306.0475 | NIST14.L                | 381456681.4 | 0.05303513  | 3937.29957 | 0.677855 |
| 3.309031756 | Cyclopropane, pentyl-                       | 93.44687828 | C8H16     | 195823.1394 | NIST14.L                | 381456681.4 | 0.051335617 | 3915.07657 | 0.679884 |
| 18.29471897 | Dodecane                                    | 90.20309659 | C12H26    | 191890.1135 | NIST14.L                | 381456681.4 | 0.050304562 | 3892.85357 | 0.711358 |
| 22.70078047 | Decane, 2,4-dimethyl-                       | 91.3879886  | C12H26    | 186192.0395 | NIST14.L                | 381456681.4 | 0.048810795 | 3870.63057 | 0.733221 |
| 22.66021588 | Naphthalene, 2-methyl-                      | 88.80129021 | C11H10    | 184528.7417 | NIST14.L                | 381456681.4 | 0.048374757 | 3848.40757 | 0.766631 |
| 9.186254944 | 1-Decen-3-one                               | 85.18926761 | C10H18O   | 182764.1688 | NIST14.L                | 381456681.4 | 0.047912169 | 3826.18457 | 0.763645 |
| 66.8563506  | Vitamin E                                   | 82.24842555 | C29H50O2  | 177369.0931 | NIST14.L                | 381456681.4 | 0.046497834 | 3803.96157 | 0.741132 |
| 39.56055089 | 1-Nonanol, 4,8-dimethyl-                    | 88.09526752 | C11H24O   | 175642.6089 | NIST14.L                | 381456681.4 | 0.046045231 | 3781.73857 | 0.743326 |
| 39.57036045 | 1-Undecene, 7-methyl-                       | 88.32403363 | C12H24    | 175211.6548 | NIST14.L                | 381456681.4 | 0.045932255 | 3759.51557 | 0.764751 |
| 72.31000519 | Oxalic acid, allyl hexadecyl ester          | 82.06309601 | C21H38O4  | 174599.253  | NIST14.L                | 381456681.4 | 0.045771712 | 3737.29257 | 0.802144 |
| 10.26521477 | N-Benzoyltyramine                           | 82.14335141 | C15H15NO2 | 172879.8838 | NIST14.L                | 381456681.4 | 0.045320974 | 3715.06957 | 1.060542 |
| 77.00498792 | 1H-Tetrazol-5-amine                         | 90.78000545 | CH3N5     | 171687.8555 | NIST14.L                | 381456681.4 | 0.04500848  | 3692.84657 | 1.246061 |
| 7.973094444 | Benzene, 1-ethyl-4-methyl-                  | 89.50776902 | C9H12     | 169200.7778 | NIST14.L                | 381456681.4 | 0.044356486 | 3670.62357 | 1.317645 |
| 10.2791761  | Benzene, 1,3,5-trimethyl-                   | 81.7045823  | C9H12     | 165433.8537 | LIGNOCELLULOSIC 2019a.L | 381456681.4 | 0.043368975 | 3648.40057 | 1.673158 |
| 8.788977826 | 4-Chloro-1-azabicyclo[2.2.2]octane          | 81.08437634 | C7H12ClN  | 163442.2129 | NIST14.L                | 381456681.4 | 0.042846861 | 3626.17757 | 2.111821 |
| 3.462760998 | Pentane, 2,2-dimethyl-                      | 86.41152789 | C7H16     | 151461.3878 | NIST14.L                | 381456681.4 | 0.039706052 | 3603.95457 | 2.124605 |
| 31.36210293 | 1,1,4,5,6-Pentamethyl-2,3-dihydro-1H-indene | 85.47428441 | C14H20    | 145893.674  | NIST14.L                | 381456681.4 | 0.038246459 | 3581.73157 | 2.131065 |
| 14.34610408 | Methane, chlorofluoro-                      | 84.04894092 | CH2ClF    | 144916.1403 | NIST14.L                | 381456681.4 | 0.037990196 | 3559.50857 | 2.741585 |
| 17.11362863 | Naphthalene                                 | 88.11614313 | C10H8     | 141576.1521 | NIST14.L                | 381456681.4 | 0.037114608 | 3537.28557 | 2.498504 |
| 82.62210548 | Hexane, 2,2,5-trimethyl-                    | 82.29352052 | C9H20     | 141121.8892 | NIST14.L                | 381456681.4 | 0.036995522 | 3515.06257 | 2.490799 |
| 65.61655856 | .beta.-Tocopherol                           | 85.94490014 | C28H48O2  | 138872.9682 | NIST14.L                | 381456681.4 | 0.03640596  | 3492.83957 | 2.515133 |
| 18.70436848 | Benzofuran, 4,7-dimethyl-                   | 85.11237295 | C10H10O   | 136724.631  | NIST14.L                | 381456681.4 | 0.035842767 | 3470.61657 | 2.538399 |
| 13.93936874 | Benzofuran, 2-methyl-                       | 90.54410998 | C9H8O     | 130318.7439 | NIST14.L                | 381456681.4 | 0.034163445 | 3448.39357 | 2.646122 |
| 15.94663083 | Naphthalene, 1,2-dihydro-                   | 83.76047638 | C10H10    | 127118.1111 | NIST14.L                | 381456681.4 | 0.03332439  | 3426.17057 | 2.695265 |
| 2.907430158 | Ethene, 1,2-difluoro-                       | 80.26251249 | C2H2F2    | 124649.0193 | NIST14.L                | 381456681.4 | 0.03267711  | 3403.94757 | 2.730826 |

|             |                                                                                                                                 |             |            |             |                                |                 |                 |                |          |
|-------------|---------------------------------------------------------------------------------------------------------------------------------|-------------|------------|-------------|--------------------------------|-----------------|-----------------|----------------|----------|
| 8.264872433 | 2,3-Pentanedione                                                                                                                | 82.46384805 | C5H8O2     | 120423.9477 | LIGNOCE<br>LLULOSIC<br>2019a.L | 381456681.<br>4 | 0.0315694<br>95 | 3381.7245<br>7 | 2.808183 |
| 9.137465789 | Mesitylene                                                                                                                      | 89.43287684 | C9H12      | 112795.016  | NIST14.L                       | 381456681.<br>4 | 0.0295695<br>48 | 3359.5015<br>7 | 2.978413 |
| 67.85718235 | Acetic acid, 7,7,10a,12a-tetramethyl-2,5-dioxo-1,2,3,4,4a,4b,5,7,8,9,10,10a,10b,11,12,12a-hexadecahydro-1-azachrysen-8-yl ester | 81.85807701 | C23H33NO4  | 110229.0984 | NIST14.L                       | 381456681.<br>4 | 0.0288968<br>85 | 3337.2785<br>7 | 3.027584 |
| 39.85368929 | Ethanone, 1-(4-hydroxy-3,5-dimethoxyphenyl)-                                                                                    | 85.96337002 | C10H12O4   | 109962.9887 | NIST14.L                       | 381456681.<br>4 | 0.0288271<br>24 | 3315.0555<br>7 | 3.014701 |
| 8.620513271 | Benzene, 1,2,3-trimethyl-                                                                                                       | 87.47977431 | C9H12      | 105884.4933 | NIST14.L                       | 381456681.<br>4 | 0.0277579<br>34 | 3292.8325<br>7 | 3.109835 |
| 3.822364697 | Aniline                                                                                                                         | 85.05011101 | C6H7N      | 105522.5195 | NIST14.L                       | 381456681.<br>4 | 0.0276630<br>41 | 3270.6095<br>7 | 3.099442 |
| 38.35568285 | Valylvaline, N,N'-dimethyl-n-butoxycarbonyl-, isohexyl ester                                                                    | 80.02193488 | C23H44N2O5 | 105396.9627 | NIST14.L                       | 381456681.<br>4 | 0.0276301<br>26 | 3248.3865<br>7 | 3.08205  |
| 7.654398945 | Benzene, propyl-                                                                                                                | 93.59566042 | C9H12      | 104850.3879 | NIST14.L                       | 381456681.<br>4 | 0.0274868<br>4  | 3226.1635<br>7 | 3.076921 |
| 18.58284475 | Decanal                                                                                                                         | 84.12835535 | C10H20O    | 104470.8848 | NIST14.L                       | 381456681.<br>4 | 0.0273873<br>52 | 3203.9405<br>7 | 3.066826 |
| 56.11399331 | Cyclopentane, 1,1,3-trimethyl-                                                                                                  | 85.08641294 | C8H16      | 102024.9894 | NIST14.L                       | 381456681.<br>4 | 0.0267461<br>53 | 3181.7175<br>7 | 3.118567 |
| 10.86193296 | N-Cyanomethyl-N-methylacetamide                                                                                                 | 84.312863   | C5H8N2O    | 99213.98788 | NIST14.L                       | 381456681.<br>4 | 0.0260092<br>41 | 3159.4945<br>7 | 3.184525 |
| 10.86193306 | 1,2,4-Cyclopentanetrione                                                                                                        | 86.13871116 | C5H4O3     | 98930.2431  | NIST14.L                       | 381456681.<br>4 | 0.0259348<br>57 | 3137.2715<br>7 | 3.171196 |
| 39.85368899 | 4-Methoxyphenol, TMS derivative                                                                                                 | 83.87584124 | C10H16O2Si | 98196.95209 | NIST14.L                       | 381456681.<br>4 | 0.0257426<br>22 | 3115.0485<br>7 | 3.172246 |
| 3.767450244 | 2-Isopropylimidazole                                                                                                            | 80.96383991 | C6H10N2    | 96554.50408 | NIST14.L                       | 381456681.<br>4 | 0.0253120<br>5  | 3092.8255<br>7 | 3.203191 |
| 32.33199656 | 2-Propanone, 1-(4-hydroxy-3-methoxyphenyl)-                                                                                     | 84.59106306 | C10H12O3   | 95836.40059 | NIST14.L                       | 381456681.<br>4 | 0.0251237<br>97 | 3070.6025<br>7 | 3.204004 |
| 19.85414448 | Phenol, 2-(1-methylethyl)-                                                                                                      | 83.97303687 | C9H12O     | 92134.76242 | NIST14.L                       | 381456681.<br>4 | 0.0241534<br>01 | 3048.3795<br>7 | 3.30861  |
| 13.71527829 | 1H-Indazole, 4-methyl-                                                                                                          | 82.85018525 | C8H8N2     | 91222.34319 | NIST14.L                       | 381456681.<br>4 | 0.0239142<br>08 | 3026.1565<br>7 | 3.317341 |
| 33.76308966 | Naphthalene, 1,4,6-trimethyl-                                                                                                   | 89.17944826 | C13H14     | 90369.17879 | NIST14.L                       | 381456681.<br>4 | 0.0236905<br>48 | 3003.9335<br>7 | 3.324069 |
| 50.69483354 | Carbonic acid, prop-1-en-2-yl tetradecyl ester                                                                                  | 83.92094917 | C18H34O3   | 87963.9145  | NIST14.L                       | 381456681.<br>4 | 0.0230600<br>01 | 2981.7105<br>7 | 3.389697 |
| 35.49813497 | 9H-Xanthene                                                                                                                     | 80.2644387  | C13H10O    | 87559.11019 | NIST14.L                       | 381456681.<br>4 | 0.0229538<br>8  | 2959.4875<br>7 | 3.379988 |
| 6.356499824 | Ethanone, 1-(2-furanyl)-                                                                                                        | 81.69565636 | C6H6O2     | 85261.37741 | NIST14.L                       | 381456681.<br>4 | 0.0223515<br>23 | 2937.2645<br>7 | 3.445012 |
| 59.49900248 | Cyclobutanone, 2,3,3-trimethyl-                                                                                                 | 87.11360822 | C7H12O     | 85252.07772 | NIST14.L                       | 381456681.<br>4 | 0.0223490<br>85 | 2915.0415<br>7 | 3.41932  |
| 54.30349063 | 2-Heptadecenal                                                                                                                  | 85.9869471  | C17H32O    | 82720.74121 | NIST14.L                       | 381456681.<br>4 | 0.0216854<br>88 | 2892.8185<br>7 | 3.49709  |
| 25.67090464 | Biphenyl                                                                                                                        | 85.77047024 | C12H10     | 78860.43037 | demo.ms<br>library.x<br>ml     | 381456681.<br>4 | 0.0206734<br>96 | 2870.5955<br>7 | 3.640096 |
| 36.31816821 | 1,3-Dioxolane                                                                                                                   | 86.60285626 | C3H6O2     | 77852.75918 | NIST14.L                       | 381456681.<br>4 | 0.0204093<br>32 | 2848.3725<br>7 | 3.658666 |
| 26.9415944  | 4-Pentenylamine, N,N-dimethyl-                                                                                                  | 80.31716538 | C7H15N     | 76842.0405  | NIST14.L                       | 381456681.<br>4 | 0.0201443<br>69 | 2826.1495<br>7 | 3.677869 |



|             |                                                |             |            |             |          |             |             |            |          |
|-------------|------------------------------------------------|-------------|------------|-------------|----------|-------------|-------------|------------|----------|
| 33.63071158 | O-(2,6-Dimethylpyrid-3-yl)-N-phenylbenzimidate | 81.82857652 | C20H18N2O  | 76201.42508 | NIST14.L | 381456681.4 | 0.01997643  | 2803.92657 | 3.679625 |
| 72.29803414 | 3-Hexene, 2,2-dimethyl-, (Z)-                  | 82.53385097 | C8H16      | 73855.8887  | NIST14.L | 381456681.4 | 0.01936154  | 2781.70357 | 3.766394 |
| 13.71486963 | 1H-Pyrrolo[2,3-b]pyridine, 2-methyl-           | 83.69479819 | C8H8N2     | 71487.68573 | NIST14.L | 381456681.4 | 0.018740709 | 2759.48057 | 3.860078 |
| 55.16157217 | (E)-4-Oxohex-2-enal                            | 88.68180804 | C6H8O2     | 67845.22224 | NIST14.L | 381456681.4 | 0.017785826 | 2737.25757 | 4.034562 |
| 44.78105325 | Oxalic acid, allyl pentadecyl ester            | 87.1752568  | C20H36O4   | 67422.9204  | NIST14.L | 381456681.4 | 0.017675118 | 2715.03457 | 4.026872 |
| 30.99966329 | Naphtho[2,1-b]furan                            | 81.4983558  | C12H8O     | 67257.10156 | NIST14.L | 381456681.4 | 0.017631649 | 2692.81157 | 4.003758 |
| 4.832073964 | Acetic anhydride                               | 80.24333415 | C4H6O3     | 66795.08084 | NIST14.L | 381456681.4 | 0.017510528 | 2670.58857 | 3.998182 |
| 11.73532691 | Benzene, (2-methylpropyl)-                     | 89.58540051 | C10H14     | 66356.69069 | NIST14.L | 381456681.4 | 0.017395603 | 2648.36557 | 3.991106 |
| 14.06945692 | Nonanal                                        | 80.27353486 | C9H18O     | 65864.10468 | NIST14.L | 381456681.4 | 0.01726647  | 2626.14257 | 3.987214 |
| 3.850529967 | Pyridine, 2-methyl-                            | 89.35903274 | C6H7N      | 63986.09146 | NIST14.L | 381456681.4 | 0.016774144 | 2603.91957 | 4.069509 |
| 14.06945706 | Acetic acid, trichloro-, heptyl ester          | 80.15938271 | C9H15Cl3O2 | 63464.98965 | NIST14.L | 381456681.4 | 0.016637535 | 2581.69657 | 4.067907 |
| 13.74404085 | Thiodiglycolic anhydride                       | 88.66095478 | C4H4O3S    | 62688.59061 | NIST14.L | 381456681.4 | 0.016434    | 2559.47357 | 4.082838 |
| 18.91198422 | Butane, 2,2-dimethyl-                          | 80.21441207 | C6H14      | 62468.6843  | NIST14.L | 381456681.4 | 0.016376351 | 2537.25057 | 4.061636 |
| 18.55004101 | 3-Undecene, 9-methyl-, (E)-                    | 80.33454572 | C12H24     | 61418.76977 | NIST14.L | 381456681.4 | 0.016101113 | 2515.02757 | 4.094884 |
| 37.69505822 | 1-Nonanol                                      | 84.89458663 | C9H20O     | 60648.83128 | NIST14.L | 381456681.4 | 0.015899271 | 2492.80457 | 4.110227 |
| 37.69625218 | Cyclooctane, methyl-                           | 86.45086681 | C9H18      | 58675.21841 | NIST14.L | 381456681.4 | 0.015381882 | 2470.58157 | 4.210605 |
| 59.58937755 | Acenaphtho[1,2-b]quinoxaline, 9-methoxy-       | 81.31708379 | C19H12N2O  | 57920.07264 | NIST14.L | 381456681.4 | 0.015183919 | 2448.35857 | 4.227133 |
| 10.28539008 | .beta.-Methoxy-.alpha.-phenylphenethyl alcohol | 82.86052827 | C15H16O2   | 57407.62245 | NIST14.L | 381456681.4 | 0.015049578 | 2426.13557 | 4.226156 |
| 18.5504474  | 4-Undecene, 5-methyl-                          | 81.22461173 | C12H24     | 56370.77354 | NIST14.L | 381456681.4 | 0.014777765 | 2403.91257 | 4.264466 |
| 10.46920883 | Benzeneethanol, .beta.-ethenyl-                | 88.75720824 | C10H12O    | 56313.2792  | NIST14.L | 381456681.4 | 0.014762693 | 2381.68957 | 4.229357 |
| 2.240839195 | Propanediamide, 2-amino-                       | 90.06766422 | C3H7N3O2   | 56146.43188 | NIST14.L | 381456681.4 | 0.014718954 | 2359.46657 | 4.202345 |
| 52.75235047 | Cyclooctane, 1,4-dimethyl-, trans-             | 85.22652127 | C10H20     | 56134.86559 | NIST14.L | 381456681.4 | 0.014715921 | 2337.24357 | 4.163622 |
| 26.34872829 | Benzene, 1,3,5-trimethyl-2-(1,2-propadienyl)-  | 84.17447037 | C12H14     | 54779.20947 | NIST14.L | 381456681.4 | 0.014360532 | 2315.02057 | 4.226093 |
| 7.023803154 | Pyridine, 2,3-dimethyl-                        | 81.07220036 | C7H9N      | 54085.72255 | NIST14.L | 381456681.4 | 0.014178733 | 2292.79757 | 4.239192 |
| 11.33599295 | 2,4,6-Cycloheptatrien-1-one, 4-methyl-         | 81.89533247 | C8H8O      | 53283.42415 | NIST14.L | 381456681.4 | 0.013968408 | 2270.57457 | 4.261315 |
| 7.237581413 | Octane, 3-methyl-                              | 82.55613547 | C9H20      | 51122.26612 | NIST14.L | 381456681.4 | 0.013401854 | 2248.35157 | 4.397989 |
| 9.149750624 | 1,3-Dioxane, 5-fluoro-2-methyl-, cis-          | 80.22110064 | C5H9FO2    | 50935.64433 | NIST14.L | 381456681.4 | 0.01335293  | 2226.12857 | 4.370473 |
| 20.79632912 | 2-Ethyl-1-H-indene                             | 80.96021032 | C11H12     | 50739.8279  | NIST14.L | 381456681.4 | 0.013301596 | 2203.90557 | 4.343542 |
| 50.69064103 | Carbonic acid, decyl prop-1-en-2-yl ester      | 81.36431378 | C14H26O3   | 49995.99831 | NIST14.L | 381456681.4 | 0.013106599 | 2181.68257 | 4.363714 |
| 51.3735361  | Cyclohexane, ethenyl-                          | 84.53251205 | C8H14      | 48866.46989 | NIST14.L | 381456681.4 | 0.01281049  | 2159.45957 | 4.419103 |

|             |                                                         |             |           |             |          |             |             |            |          |
|-------------|---------------------------------------------------------|-------------|-----------|-------------|----------|-------------|-------------|------------|----------|
| 48.36084059 | 1,7-Dimethyl-4-(1-methylethyl)cyclodecane               | 82.08732774 | C15H30    | 46850.09824 | NIST14.L | 381456681.4 | 0.012281892 | 2137.23657 | 4.561861 |
| 10.76115011 | Diglycolic acid, di(3-phenylpropyl) ester               | 86.11201807 | C22H26O5  | 45128.39806 | NIST14.L | 381456681.4 | 0.011830543 | 2115.01357 | 4.686658 |
| 10.48746321 | 3-Phenyl-1-propanol, acetate                            | 81.155676   | C11H14O2  | 42420.20646 | NIST14.L | 381456681.4 | 0.011120583 | 2092.79057 | 4.933476 |
| 29.45954763 | 1-Phenyl-5-methylheptane                                | 80.01532439 | C14H22    | 41816.70038 | NIST14.L | 381456681.4 | 0.010962372 | 2070.56757 | 4.951533 |
| 39.96009104 | 5-Hexen-3-one                                           | 86.78875675 | C6H10O    | 37790.75918 | NIST14.L | 381456681.4 | 0.00990696  | 2048.34457 | 5.420226 |
| 18.91431588 | Hexane, 2,2,5,5-tetramethyl-                            | 82.07767578 | C10H22    | 36144.63845 | NIST14.L | 381456681.4 | 0.009475424 | 2026.12157 | 5.605594 |
| 8.2096499   | 1-Hexanone, 5-methyl-1-phenyl-                          | 80.70318075 | C13H18O   | 33948.07839 | NIST14.L | 381456681.4 | 0.008899589 | 2003.89857 | 5.902834 |
| 3.466095971 | 3-Pentanone, 2,4-dimethyl-                              | 89.98359703 | C7H14O    | 33473.61516 | NIST14.L | 381456681.4 | 0.008775207 | 1981.67557 | 5.920112 |
| 58.70200227 | Phthalic acid, bis(2-pentyl) ester                      | 80.39932478 | C18H26O4  | 32389.79693 | NIST14.L | 381456681.4 | 0.008491081 | 1959.45257 | 6.049598 |
| 14.55503096 | 1,3-Benzodioxol-2-one                                   | 88.42660937 | C7H4O3    | 27770.18298 | NIST14.L | 381456681.4 | 0.007280036 | 1937.22957 | 6.975934 |
| 5.919899886 | Sydnone, 3-(1-methylethyl)-                             | 81.19545001 | C5H8N2O2  | 26238.82084 | NIST14.L | 381456681.4 | 0.006878585 | 1915.00657 | 7.298371 |
| 54.69877718 | Butanimidamide                                          | 80.43827969 | C4H10N2   | 26092.75778 | NIST14.L | 381456681.4 | 0.006840294 | 1892.78357 | 7.254057 |
| 41.25991051 | Thiophene-2-carboxylic acid, 2,2,2-trifluoroethyl ester | 87.9113504  | C7H5F3O2S | 25199.0004  | NIST14.L | 381456681.4 | 0.006605993 | 1870.56057 | 7.423154 |
| 7.504051347 | Oxazole, 4,5-dihydro-2-methyl-                          | 88.27832266 | C4H7NO    | 24128.40564 | NIST14.L | 381456681.4 | 0.006325333 | 1848.33757 | 7.660422 |
| 15.23246214 | 2-Azetidinone, 1-isopropyl-3,3-dimethyl-4-phenyl-       | 83.58849886 | C14H19NO  | 16911.15393 | NIST14.L | 381456681.4 | 0.004433309 | 1171.11457 | 6.925101 |
| 25.95020608 | 1,2,3-Trimethyl diaziridine                             | 86.84306402 | C4H10N2   | 15194.94952 | NIST14.L | 381456681.4 | 0.003983401 | 448.891573 | 2.954216 |
| 20.71874044 | Ethaneperoxoic acid, 1-cyano-1-phenylbutyl ester        | 87.03542359 | C13H15NO3 | 14887.73579 | NIST14.L | 381456681.4 | 0.003902864 | 426.668573 | 2.865906 |
| 7.849912604 | N-Ethylformamide                                        | 84.58038903 | C3H7NO    | 14396.74691 | NIST14.L | 381456681.4 | 0.00377415  | 404.445573 | 2.809284 |
| 38.64441702 | 3-Nitro-1-phenyl-1-butanone                             | 81.71644059 | C10H11NO3 | 13184.5727  | NIST14.L | 381456681.4 | 0.003456375 | 382.222573 | 2.899014 |
| 50.97458946 | 3H-Pyrazol-3-one, 2,4-dihydro-4,5-dimethyl-             | 82.26276203 | C5H8N2O   | 9703.637176 | NIST14.L | 381456681.4 | 0.002543837 | 359.999573 | 3.709945 |

**Table S29.** Py-GC/MS data for peat.

| Component RT (mins) | Compound Name                        | Match Factor (%) | Molecular Formula | Component Area | Library File         | Total area | Compound %  | Stdva       | CV %        |
|---------------------|--------------------------------------|------------------|-------------------|----------------|----------------------|------------|-------------|-------------|-------------|
| 48.20887761         | n-Hexadecanoic acid                  | 85.83462455      | C16H32O2          | 46211177.1     | NIST14.L             | 1056874332 | 4.372438208 | 130976.5539 | 0.283430465 |
| 51.8706594          | 9,12-Octadecadienoic acid (Z,Z)-     | 80.86781863      | C18H32O2          | 26326250.27    | NIST14.L             | 1056874332 | 2.4909537   | 90556.40512 | 0.343977605 |
| 58.38063518         | 5-Pregnen-3.beta.-ol-20-one, formate | 85.53772227      | C22H32O3          | 25762022.12    | NIST14.L             | 1056874332 | 2.437567206 | 41370.32618 | 0.160586487 |
| 51.87029704         | 2-Methylbicyclo[3.2.1]octane         | 84.04203204      | C9H16             | 22920473.78    | NIST14.L             | 1056874332 | 2.168703798 | 29512.79974 | 0.128761735 |
| 43.69972103         | Caffeine                             | 94.39784317      | C8H10N4O2         | 11205760.9     | demo.ms library.x ml | 1056874332 | 1.06027373  | 30161.0912  | 0.269157012 |
| 62.86076828         | Squalene                             | 98.32259329      | C30H50            | 10445193.33    | NIST14.L             | 1056874332 | 0.98830987  | 28814.40382 | 0.27586281  |

|             |                                          |             |          |             |                               |                |                 |                 |                 |
|-------------|------------------------------------------|-------------|----------|-------------|-------------------------------|----------------|-----------------|-----------------|-----------------|
| 52.38854722 | Octadecanoic acid                        | 94.42345466 | C18H36O2 | 9499706.327 | NIST14.L                      | 105687433<br>2 | 0.8988491<br>86 | 8900.5001<br>54 | 0.093692<br>372 |
| 55.97728678 | Eicosanoic acid                          | 93.39846252 | C20H40O2 | 6058863.584 | NIST14.L                      | 105687433<br>2 | 0.5732813<br>64 | 12397.453<br>18 | 0.204616<br>807 |
| 74.17690141 | Octacosanol                              | 82.18058604 | C28H58O  | 4599021.023 | NIST14.L                      | 105687433<br>2 | 0.4351530<br>63 | 14518.859<br>93 | 0.315694<br>576 |
| 4.853969719 | 2-Furanmethanol                          | 96.69541408 | C5H6O2   | 4565141.686 | LIGNOCE<br>LLULOSIC<br>2019.L | 105687433<br>2 | 0.4319474<br>46 | 3816.3258<br>65 | 0.083597<br>096 |
| 75.12936559 | 1-Dodecanol, 2-hexyl-                    | 87.54524498 | C18H38O  | 4472421.633 | NIST14.L                      | 105687433<br>2 | 0.4231744<br>02 | 2439.2038<br>44 | 0.054538<br>772 |
| 31.02102171 | Pentadecane                              | 98.90223543 | C15H32   | 4047553.392 | NIST14.L                      | 105687433<br>2 | 0.3829739<br>52 | 14452.636<br>14 | 0.357070<br>92  |
| 2.910889397 | Toluene                                  | 96.40378815 | C7H8     | 3267641.352 | NIST14.L                      | 105687433<br>2 | 0.3091797<br>44 | 11468.487<br>06 | 0.350971<br>414 |
| 9.3170024   | Phenol                                   | 97.30140941 | C6H6O    | 2851231.135 | NIST14.L                      | 105687433<br>2 | 0.2697795<br>8  | 4150.6661<br>91 | 0.145574<br>525 |
| 13.89106906 | Formic acid, 2-propenyl ester            | 86.38053855 | C4H6O2   | 2693078.956 | NIST14.L                      | 105687433<br>2 | 0.2548154<br>38 | 2562.6466<br>82 | 0.095156<br>76  |
| 7.049657527 | 1,2-Cyclopentanedione                    | 95.75580352 | C5H6O2   | 2660110.068 | NIST14.L                      | 105687433<br>2 | 0.2516959<br>67 | 8883.8073<br>76 | 0.333963<br>902 |
| 75.11679393 | Carbonic acid, eicosyl vinyl ester       | 81.56197365 | C23H44O3 | 2549814.548 | NIST14.L                      | 105687433<br>2 | 0.2412599<br>56 | 8743.0245<br>96 | 0.342888<br>647 |
| 19.55635947 | Catechol                                 | 87.07766287 | C6H6O2   | 2297871.061 | NIST14.L                      | 105687433<br>2 | 0.2174214<br>09 | 8893.4007<br>59 | 0.387027<br>841 |
| 13.81521873 | Diazene, bis(1,1-dimethylethyl)-         | 86.23701187 | C8H18N2  | 2295739.891 | NIST14.L                      | 105687433<br>2 | 0.2172197<br>6  | 10881.477<br>06 | 0.473985<br>625 |
| 10.94490416 | 1,2-Cyclopentanedione, 3-methyl-         | 96.86539523 | C6H8O2   | 2246421.755 | NIST14.L                      | 105687433<br>2 | 0.2125533<br>46 | 10156.028<br>76 | 0.452098<br>042 |
| 9.314195394 | 3-Methylpyridazine                       | 94.57823875 | C5H6N2   | 2000339.76  | NIST14.L                      | 105687433<br>2 | 0.1892694<br>05 | 12545.803<br>26 | 0.627183<br>617 |
| 7.019315026 | 2-Cyclopenten-1-one, 2-hydroxy-          | 90.2073132  | C5H6O2   | 1964610.205 | NIST14.L                      | 105687433<br>2 | 0.1858887<br>24 | 13302.035<br>2  | 0.677082<br>668 |
| 66.18992458 | Stigmasta-3,5-diene                      | 93.88691329 | C29H48   | 1963715.713 | NIST14.L                      | 105687433<br>2 | 0.1858040<br>88 | 16016.138<br>01 | 0.815603<br>7   |
| 4.186436333 | 3,5-Dimethylpyrazole                     | 80.37549085 | C5H8N2   | 1879001.492 | NIST14.L                      | 105687433<br>2 | 0.1777885<br>45 | 16127.293<br>41 | 0.858290<br>612 |
| 30.38751447 | n-Butyl nitrite                          | 82.1775379  | C4H9NO2  | 1802714.151 | NIST14.L                      | 105687433<br>2 | 0.1705703<br>41 | 13587.134<br>12 | 0.753704<br>303 |
| 13.82356898 | Trimethylaluminum                        | 87.40514428 | C3H9Al   | 1772266.029 | NIST14.L                      | 105687433<br>2 | 0.1676893<br>81 | 12694.539<br>03 | 0.716288<br>572 |
| 30.86777357 | N-Carboethoxy-N-methoxyamine             | 93.46281302 | C4H9NO3  | 1749254.437 | NIST14.L                      | 105687433<br>2 | 0.1655120<br>56 | 12581.252<br>55 | 0.719235<br>137 |
| 2.6519934   | Pyridine                                 | 95.2258505  | C5H5N    | 1713996.52  | NIST14.L                      | 105687433<br>2 | 0.162176        | 12253.616<br>51 | 0.714914<br>9   |
| 30.41577582 | Butanoic acid                            | 89.0314709  | C4H8O2   | 1641456.369 | NIST14.L                      | 105687433<br>2 | 0.1553123<br>51 | 11008.648<br>14 | 0.670663<br>464 |
| 37.85972791 | E-2-Octadecadecen-1-ol                   | 84.70194777 | C18H36O  | 1425815.576 | NIST14.L                      | 105687433<br>2 | 0.1349087<br>15 | 9994.2091<br>65 | 0.700946<br>836 |
| 52.65072479 | Hexadecanamide                           | 86.88218236 | C16H33NO | 1374755.99  | NIST14.L                      | 105687433<br>2 | 0.1300775<br>27 | 8552.3854<br>81 | 0.622102<br>071 |
| 10.9017843  | 2-Cyclopenten-1-one, 2-hydroxy-3-methyl- | 94.99434632 | C6H8O2   | 1307097.399 | NIST14.L                      | 105687433<br>2 | 0.1236757<br>63 | 4362.2662<br>79 | 0.333736<br>895 |
| 73.4368536  | 1-Decanol, 2-hexyl-                      | 84.0231861  | C16H34O  | 1304915.225 | NIST14.L                      | 105687433<br>2 | 0.1234692<br>89 | 4852.9678<br>76 | 0.371899<br>092 |
| 6.546421364 | 2(5H)-Furanone                           | 95.04268367 | C4H4O2   | 1279458.486 | NIST14.L                      | 105687433<br>2 | 0.1210606<br>07 | 2731.1470<br>54 | 0.213461<br>17  |
| 4.860903975 | 3-Butyn-1-ol                             | 91.42763389 | C4H6O    | 1274790.113 | NIST14.L                      | 105687433<br>2 | 0.1206188<br>92 | 3703.5063<br>38 | 0.290518<br>91  |
| 53.54378496 | Isopropyl linoleate                      | 87.63622469 | C21H38O2 | 1221070.709 | NIST14.L                      | 105687433<br>2 | 0.1155360<br>36 | 1147.6750<br>67 | 0.093989<br>239 |

|             |                                            |             |          |             |                               |                |                 |                 |                 |
|-------------|--------------------------------------------|-------------|----------|-------------|-------------------------------|----------------|-----------------|-----------------|-----------------|
| 45.41152181 | Hexadecanenitrile                          | 85.74345066 | C16H31N  | 1208504.249 | NIST14.L                      | 105687433<br>2 | 0.1143470<br>15 | 7377.8534<br>6  | 0.610494<br>623 |
| 45.41138737 | Tetradecanenitrile                         | 85.90083774 | C14H27N  | 1197287.111 | NIST14.L                      | 105687433<br>2 | 0.1132856<br>65 | 6179.1095<br>14 | 0.516092<br>544 |
| 38.49856753 | Heptadecane                                | 97.6515712  | C17H36   | 1150536.054 | NIST14.L                      | 105687433<br>2 | 0.1088621<br>44 | 174.85445<br>06 | 0.015197<br>651 |
| 53.40033944 | Linoelaidic acid                           | 87.60503554 | C18H32O2 | 1136861.118 | NIST14.L                      | 105687433<br>2 | 0.1075682<br>4  | 21908.348<br>76 | 1.927091<br>042 |
| 6.935707032 | 1H-Tetrazole                               | 93.48824074 | CH2N4    | 1089008.348 | NIST14.L                      | 105687433<br>2 | 0.1030404<br>77 | 20217.884<br>78 | 1.856540<br>846 |
| 37.34268022 | 6,9-Heptadecadiene                         | 92.21846063 | C17H32   | 1061532.508 | NIST14.L                      | 105687433<br>2 | 0.1004407<br>5  | 19720.237<br>48 | 1.857713<br>949 |
| 59.12549399 | Docosanoic acid                            | 88.70139197 | C22H44O2 | 1056076.888 | NIST14.L                      | 105687433<br>2 | 0.0999245<br>47 | 20538.410<br>38 | 1.944783<br>623 |
| 79.49068381 | Nitric acid, nonyl ester                   | 81.00295728 | C9H19NO3 | 1032763.579 | NIST14.L                      | 105687433<br>2 | 0.0977186<br>74 | 2924.2715<br>62 | 0.283150<br>144 |
| 6.929187052 | Methoxyacetoneitrile                       | 92.35170155 | C3H5NO   | 1031088.75  | NIST14.L                      | 105687433<br>2 | 0.0975602<br>04 | 4409.2732<br>41 | 0.427632<br>756 |
| 51.78494111 | Ethanone, 1-(1H-pyrrol-2-yl)-              | 85.391026   | C6H7NO   | 1024408.025 | NIST14.L                      | 105687433<br>2 | 0.0969280<br>83 | 18168.666<br>14 | 1.773577<br>1   |
| 23.27788166 | 4-Hydroxy-2-methylacetophenone             | 88.95560161 | C9H10O2  | 1007692.909 | NIST14.L                      | 105687433<br>2 | 0.0953465<br>21 | 5932.8921<br>38 | 0.588759<br>937 |
| 3.32499077  | L-Alanine, N-methoxycarbonyl-, butyl ester | 80.32973347 | C9H17NO4 | 1004076.568 | NIST14.L                      | 105687433<br>2 | 0.0950043<br>48 | 2567.8196<br>98 | 0.255739<br>431 |
| 68.99066251 | .gamma.-Sitosterol                         | 83.67384016 | C29H50O  | 976825.7471 | NIST14.L                      | 105687433<br>2 | 0.0924259<br>13 | 3877.0358<br>5  | 0.396901<br>48  |
| 2.801237355 | Methanamine, N,N-difluoro-                 | 91.90306041 | CH3F2N   | 942187.0757 | NIST14.L                      | 105687433<br>2 | 0.0891484<br>49 | 1806.0023<br>71 | 0.191681<br>93  |
| 53.54078491 | 1,8,11-Heptadecatriene, (Z,Z)-             | 81.92319939 | C17H30   | 936669.4348 | NIST14.L                      | 105687433<br>2 | 0.0886263<br>77 | 21720.700<br>71 | 2.318929<br>166 |
| 32.06606398 | .beta.-D-Glucopyranose, 1,6-anhydro-       | 81.37983915 | C6H10O5  | 928718.9206 | NIST14.L                      | 105687433<br>2 | 0.0878741<br>11 | 13089.813<br>01 | 1.409448<br>297 |
| 30.86775128 | Pentanoic acid                             | 85.19485408 | C5H10O2  | 888668.5946 | NIST14.L                      | 105687433<br>2 | 0.0840846<br>04 | 18104.178<br>09 | 2.037224<br>923 |
| 26.62138888 | 1-Tetradecene                              | 95.30087098 | C14H28   | 868168.1155 | NIST14.L                      | 105687433<br>2 | 0.0821448<br>77 | 11657.259<br>23 | 1.342742<br>151 |
| 2.191294289 | Furan, 2,5-dimethyl-                       | 87.09220116 | C6H8O    | 864842.2509 | LIGNOCE<br>LLULOSIC<br>2019.L | 105687433<br>2 | 0.0818301<br>88 | 8765.0107<br>44 | 1.013480<br>867 |
| 13.34711283 | Ethanone, 1-(2-methyl-1-cyclopenten-1-yl)- | 81.9902009  | C8H12O   | 844795.8979 | NIST14.L                      | 105687433<br>2 | 0.0799334<br>29 | 8535.6116<br>63 | 1.010375<br>605 |
| 22.45718336 | Indole                                     | 92.18547347 | C8H7N    | 805862.6859 | NIST14.L                      | 105687433<br>2 | 0.0762496<br>22 | 16298.516<br>56 | 2.022493<br>018 |
| 22.45718413 | m-Aminophenylacetylene                     | 92.00609878 | C8H7N    | 801240.3012 | NIST14.L                      | 105687433<br>2 | 0.0758122<br>59 | 7641.6834<br>39 | 0.953731<br>786 |
| 13.34415195 | Phenol, 2-methoxy-                         | 89.42063234 | C7H8O2   | 774632.5884 | NIST14.L                      | 105687433<br>2 | 0.0732946<br>73 | 5930.1439<br>43 | 0.765542<br>792 |
| 37.33019512 | cis-7-Dodecen-1-ol                         | 89.54522418 | C12H24O  | 764953.602  | NIST14.L                      | 105687433<br>2 | 0.0723788<br>61 | 1995.6429<br>33 | 0.260884<br>18  |
| 26.95503708 | Tetradecane                                | 96.88544017 | C14H30   | 761456.1457 | NIST14.L                      | 105687433<br>2 | 0.0720479<br>36 | 515.44229<br>38 | 0.067691<br>659 |
| 37.61612235 | 8-Heptadecene                              | 91.33408997 | C17H34   | 722149.2299 | NIST14.L                      | 105687433<br>2 | 0.0683287<br>7  | 1241.7511<br>43 | 0.171952<br>152 |
| 4.207675464 | Furfural                                   | 97.20605088 | C5H4O2   | 711265.2635 | NIST14.L                      | 105687433<br>2 | 0.0672989<br>44 | 1082.4988<br>74 | 0.152193<br>412 |
| 68.28555407 | Stigmasterol                               | 85.5342604  | C29H48O  | 703708.0703 | NIST14.L                      | 105687433<br>2 | 0.0665838<br>93 | 11515.241<br>07 | 1.636366<br>209 |
| 26.61760836 | 1-Tetradecanol                             | 94.5246448  | C14H30O  | 676306.0731 | NIST14.L                      | 105687433<br>2 | 0.0639911<br>53 | 1535.3409<br>53 | 0.227018<br>655 |
| 54.19673247 | Octadecanoic acid, 2-propenyl ester        | 82.07766687 | C21H40O2 | 642913.1587 | NIST14.L                      | 105687433<br>2 | 0.0608315<br>61 | 2799.5039<br>06 | 0.435440<br>443 |

|             |                                                                       |             |            |             |          |                |                 |                 |                 |
|-------------|-----------------------------------------------------------------------|-------------|------------|-------------|----------|----------------|-----------------|-----------------|-----------------|
| 18.05195267 | 1,4:3,6-Dianhydro-<br>.alpha.-d-glucopyranose                         | 86.38647891 | C6H8O4     | 637574.518  | NIST14.L | 105687433<br>2 | 0.0603264<br>27 | 9049.5211<br>8  | 1.419366<br>823 |
| 14.85633257 | 2-Cyclopenten-1-one, 3-<br>ethyl-2-hydroxy-                           | 88.12326992 | C7H10O2    | 629685.1997 | NIST14.L | 105687433<br>2 | 0.0595799<br>5  | 9551.6552<br>35 | 1.516893<br>718 |
| 5.605464566 | Styrene                                                               | 95.9457212  | C8H8       | 618607.9902 | NIST14.L | 105687433<br>2 | 0.0585318<br>4  | 10325.348<br>14 | 1.669126<br>216 |
| 22.71036771 | Tridecane                                                             | 92.80953382 | C13H28     | 616599.395  | NIST14.L | 105687433<br>2 | 0.0583417<br>89 | 9566.5537<br>72 | 1.551502<br>296 |
| 65.43712364 | Stigmasta-5,22-dien-3-<br>ol, acetate, (3.beta.,22Z)-                 | 86.20441    | C31H50O2   | 612231.6505 | NIST14.L | 105687433<br>2 | 0.0579285<br>19 | 9815.1961<br>32 | 1.603183<br>391 |
| 4.394494633 | 1H-Pyrrole, 1-methyl-                                                 | 89.48024134 | C5H7N      | 607790.5425 | NIST14.L | 105687433<br>2 | 0.0575083<br>08 | 7290.5765<br>78 | 1.199521<br>228 |
| 16.20788953 | Benzene, pentyl-                                                      | 91.72434947 | C11H16     | 596918.426  | NIST14.L | 105687433<br>2 | 0.0564796<br>03 | 6649.2755<br>7  | 1.113933<br>71  |
| 13.43870733 | Cyclopropane, octyl-                                                  | 90.66770831 | C11H22     | 580972.193  | NIST14.L | 105687433<br>2 | 0.0549707<br>92 | 6707.5481<br>27 | 1.154538<br>583 |
| 13.438268   | 1-Nonanol                                                             | 90.86450292 | C9H20O     | 576881.7762 | NIST14.L | 105687433<br>2 | 0.0545837<br>63 | 5057.4572<br>93 | 0.876688<br>691 |
| 3.482586032 | Carbonocyanidic acid,<br>ethyl ester                                  | 80.64885588 | C4H5NO2    | 573408.0564 | NIST14.L | 105687433<br>2 | 0.0542550<br>84 | 5818.7170<br>23 | 1.014760<br>249 |
| 4.169309337 | 2-Cyclopenten-1-one                                                   | 98.36304158 | C5H6O      | 572632.1637 | NIST14.L | 105687433<br>2 | 0.0541816<br>7  | 3848.4075<br>73 | 0.672055<br>783 |
| 23.27817765 | Ethanone, 1-(2-hydroxy-<br>5-methylphenyl)-                           | 91.10191044 | C9H10O2    | 567199.3975 | NIST14.L | 105687433<br>2 | 0.0536676<br>29 | 3826.1845<br>73 | 0.674574<br>866 |
| 65.62332789 | .beta.-Tocopherol                                                     | 91.82940846 | C28H48O2   | 565390.0911 | NIST14.L | 105687433<br>2 | 0.0534964<br>35 | 3803.9615<br>73 | 0.672803<br>014 |
| 30.68613129 | 1-Pentadecene                                                         | 94.69928643 | C15H30     | 562332.5139 | NIST14.L | 105687433<br>2 | 0.0532071<br>31 | 3781.7385<br>73 | 0.672509<br>321 |
| 55.41673664 | Pyrrolo[1,2-a]pyrazine-<br>1,4-dione, hexahydro-3-<br>(phenylmethyl)- | 80.98579177 | C14H16N2O2 | 550256.853  | NIST14.L | 105687433<br>2 | 0.0520645<br>49 | 3759.5155<br>73 | 0.683229<br>214 |
| 3.303265436 | Cyclopropane, pentyl-                                                 | 85.95084012 | C8H16      | 511609.9227 | NIST14.L | 105687433<br>2 | 0.0484078<br>29 | 3737.2925<br>73 | 0.730496<br>499 |
| 12.26514786 | Phenol, 2-methyl-                                                     | 89.42458935 | C7H8O      | 505218.7496 | NIST14.L | 105687433<br>2 | 0.0478031<br>05 | 3715.0695<br>73 | 0.735338<br>816 |
| 4.806574006 | Ethylbenzene                                                          | 93.35870788 | C8H10      | 503395.3783 | NIST14.L | 105687433<br>2 | 0.0476305<br>8  | 4070.6375<br>73 | 0.808636<br>263 |
| 26.95403684 | Undecane, 4,7-dimethyl-                                               | 95.94912402 | C13H28     | 495154.7961 | NIST14.L | 105687433<br>2 | 0.0468508<br>68 | 4048.4145<br>73 | 0.817605<br>849 |
| 17.92083868 | 1-Dodecene                                                            | 96.11250097 | C12H24     | 485996.4465 | NIST14.L | 105687433<br>2 | 0.0459843<br>17 | 4026.1915<br>73 | 0.828440<br>537 |
| 9.533861841 | Decane                                                                | 90.35336057 | C10H22     | 480901.3484 | NIST14.L | 105687433<br>2 | 0.0455022<br>26 | 4003.9685<br>73 | 0.832596<br>662 |
| 3.299489833 | Cyclobutane, 1,2-diethyl-<br>, trans-                                 | 93.69525892 | C8H16      | 471983.4001 | NIST14.L | 105687433<br>2 | 0.0446584<br>22 | 3981.7455<br>73 | 0.843619<br>833 |
| 40.4931726  | 5-Heptadecene, 1-<br>bromo-                                           | 82.87890031 | C17H33Br   | 467249.343  | NIST14.L | 105687433<br>2 | 0.0442104<br>92 | 3048.3795<br>73 | 0.652409<br>601 |
| 26.2735501  | 1H-Indole, 4-methyl-                                                  | 93.88217595 | C9H9N      | 457871.6369 | NIST14.L | 105687433<br>2 | 0.0433231<br>86 | 3026.1565<br>73 | 0.660918<br>111 |
| 5.608048932 | 1,3,5,7-<br>Cyclooctatetraene                                         | 92.40194938 | C8H8       | 454634.6157 | NIST14.L | 105687433<br>2 | 0.0430169<br>04 | 3003.9335<br>73 | 0.660735<br>78  |
| 4.41421271  | 1H-Pyrrole, 2-methyl-                                                 | 88.46962259 | C5H7N      | 453879.5974 | NIST14.L | 105687433<br>2 | 0.0429454<br>65 | 2981.7105<br>73 | 0.656938<br>666 |
| 30.67880144 | 1-Tridecene                                                           | 94.64455408 | C13H26     | 441993.4491 | NIST14.L | 105687433<br>2 | 0.0418208<br>14 | 2959.4875<br>73 | 0.669577<br>248 |
| 5.017152959 | Benzene, 1,3-dimethyl-                                                | 86.00985368 | C8H10      | 440657.2999 | NIST14.L | 105687433<br>2 | 0.0416943<br>89 | 2937.2645<br>73 | 0.666564<br>374 |
| 6.336238547 | Ethanone, 1-(2-furanyl)-                                              | 97.60071101 | C6H6O2     | 439601.5201 | NIST14.L | 105687433<br>2 | 0.0415944<br>93 | 2915.0415<br>73 | 0.663109<br>985 |
| 52.73913056 | 2-Cyclopenten-1-one, 3-<br>methyl-                                    | 87.74016444 | C6H8O      | 437410.3232 | NIST14.L | 105687433<br>2 | 0.0413871<br>65 | 2892.8185<br>73 | 0.661351<br>235 |

|             |                                          |             |           |             |                              |                |                 |                 |                 |
|-------------|------------------------------------------|-------------|-----------|-------------|------------------------------|----------------|-----------------|-----------------|-----------------|
| 3.30631386  | Cyclobutane, 1,2-diethyl-, cis-          | 90.29001018 | C8H16     | 431708.7294 | NIST14.L                     | 105687433<br>2 | 0.0408476<br>88 | 2870.5955<br>73 | 0.664938<br>042 |
| 4.920747845 | Pyridine, 3-methyl-                      | 82.85721361 | C6H7N     | 417645.6274 | NIST14.L                     | 105687433<br>2 | 0.0395170<br>57 | 2848.3725<br>73 | 0.682007<br>038 |
| 67.87403116 | Campesterol                              | 80.62159161 | C28H48O   | 405832.8771 | NIST14.L                     | 105687433<br>2 | 0.0383993<br>5  | 2826.1495<br>73 | 0.696382<br>608 |
| 34.54976448 | 1-Dodecanol                              | 94.91292437 | C12H26O   | 400148.4291 | NIST14.L                     | 105687433<br>2 | 0.0378614<br>96 | 2803.9265<br>73 | 0.700721<br>625 |
| 46.25798612 | Hexadecanoic acid, methyl ester          | 87.14109511 | C17H34O2  | 393850.8293 | NIST14.L                     | 105687433<br>2 | 0.0372656<br>25 | 2781.7035<br>73 | 0.706283<br>538 |
| 11.74501439 | Benzene, n-butyl-                        | 89.78036016 | C10H14    | 392714.4709 | NIST14.L                     | 105687433<br>2 | 0.0371581<br>05 | 2759.4805<br>73 | 0.702668<br>421 |
| 12.2641817  | p-Cresol                                 | 90.77254863 | C7H8O     | 392468.5648 | NIST14.L                     | 105687433<br>2 | 0.0371348<br>37 | 2737.2575<br>73 | 0.697446<br>323 |
| 34.54433041 | 3-Hexadecene, (Z)-                       | 95.12316518 | C16H32    | 392460.1151 | NIST14.L                     | 105687433<br>2 | 0.0371340<br>38 | 2715.0345<br>73 | 0.691798<br>853 |
| 18.29890737 | Dodecane                                 | 93.3348761  | C12H26    | 390163.9735 | NIST14.L                     | 105687433<br>2 | 0.0369167<br>8  | 2270.5745<br>73 | 0.581953<br>929 |
| 22.3506024  | Cyclopropane, nonyl-                     | 95.82222596 | C12H24    | 381630.713  | NIST14.L                     | 105687433<br>2 | 0.0361093<br>75 | 2248.3515<br>73 | 0.589143<br>247 |
| 8.172025802 | 2,4-Dimethylfuran                        | 86.26793818 | C6H8O     | 373279.55   | NIST14.L                     | 105687433<br>2 | 0.0353191<br>99 | 2226.1285<br>73 | 0.596370<br>354 |
| 4.169313803 | Furan, 3-methyl-                         | 85.64136943 | C5H6O     | 370082.6449 | LIGNOC<br>LLULOSIC<br>2019.L | 105687433<br>2 | 0.0350167<br>12 | 2203.9055<br>73 | 0.595517<br>137 |
| 32.23211028 | Isoxazolidine                            | 88.82853482 | C3H7NO    | 347046.6472 | NIST14.L                     | 105687433<br>2 | 0.0328370<br>78 | 2181.6825<br>73 | 0.628642<br>458 |
| 26.26590808 | 1H-Indole, 6-methyl-                     | 93.41944426 | C9H9N     | 334431.8697 | NIST14.L                     | 105687433<br>2 | 0.0316434<br>85 | 2159.4595<br>73 | 0.645709<br>865 |
| 51.90747135 | 4-Cyclopentene-1,3-dione                 | 80.05097484 | C5H4O2    | 334249.1106 | NIST14.L                     | 105687433<br>2 | 0.0316261<br>92 | 2137.2365<br>73 | 0.639414<br>289 |
| 2.324047782 | Propanediamide, 2-amino-                 | 87.6748617  | C3H7N3O2  | 332181.4112 | NIST14.L                     | 105687433<br>2 | 0.0314305<br>5  | 2115.0135<br>73 | 0.636704<br>374 |
| 5.019056039 | 2,4-Pentanedione, ion(1-), lithium       | 80.63976014 | C5H7LiO2  | 330375.1526 | NIST14.L                     | 105687433<br>2 | 0.0312596<br>44 | 2092.7905<br>73 | 0.633458<br>829 |
| 16.37776327 | Phenol, 3,4-dimethyl-                    | 85.72698932 | C8H10O    | 326122.8067 | NIST14.L                     | 105687433<br>2 | 0.0308572<br>93 | 2070.5675<br>73 | 0.634904<br>254 |
| 34.83400383 | Hexadecane                               | 91.27440584 | C16H34    | 323620.7864 | NIST14.L                     | 105687433<br>2 | 0.0306205<br>55 | 2048.3445<br>73 | 0.632945<br>923 |
| 26.27455173 | 1H-Indole, 7-methyl-                     | 92.99170941 | C9H9N     | 320874.2802 | NIST14.L                     | 105687433<br>2 | 0.0303606<br>84 | 2026.1215<br>73 | 0.631437<br>824 |
| 6.129080569 | 2-Cyclopenten-1-one, 2-methyl-           | 88.18035328 | C6H8O     | 317596.1881 | NIST14.L                     | 105687433<br>2 | 0.0300505<br>16 | 2003.8985<br>73 | 0.630958<br>005 |
| 54.55012649 | 2-Bromotetradecane                       | 86.19282513 | C14H29Br  | 312664.9591 | NIST14.L                     | 105687433<br>2 | 0.0295839<br>3  | 1981.6755<br>73 | 0.633801<br>619 |
| 17.30208338 | Phenol, 4-ethyl-                         | 81.69760202 | C8H10O    | 301138.7687 | NIST14.L                     | 105687433<br>2 | 0.0284933<br>37 | 1959.4525<br>73 | 0.650680<br>941 |
| 63.81650126 | Sulfurous acid, 2-ethylhexyl nonyl ester | 81.80422547 | C17H36O3S | 297608.1592 | NIST14.L                     | 105687433<br>2 | 0.0281592<br>76 | 1892.7835<br>73 | 0.635998<br>549 |
| 20.75556463 | Benzene, hexyl-                          | 84.61567653 | C12H18    | 296601.8068 | NIST14.L                     | 105687433<br>2 | 0.0280640<br>56 | 1870.5605<br>73 | 0.630663<br>917 |
| 13.34689645 | Mequinol                                 | 90.02999868 | C7H8O2    | 279381.3955 | NIST14.L                     | 105687433<br>2 | 0.0264346<br>85 | 1848.3375<br>73 | 0.661582<br>197 |
| 22.35168421 | 1-Decanol                                | 95.7264715  | C10H22O   | 270498.5121 | NIST14.L                     | 105687433<br>2 | 0.0255941<br>98 | 1171.1145<br>73 | 0.432946<br>771 |
| 6.420893675 | Butyrolactone                            | 92.29426041 | C4H6O2    | 267327.9678 | NIST14.L                     | 105687433<br>2 | 0.0252942<br>06 | 448.89157<br>33 | 0.167917<br>924 |
| 63.81726993 | Nonadecane                               | 87.12489114 | C19H40    | 263675.2774 | NIST14.L                     | 105687433<br>2 | 0.0249485<br>93 | 426.66857<br>33 | 0.161815<br>919 |
| 4.415193761 | Pyrazine                                 | 84.64871886 | C4H4N2    | 261933.0445 | NIST14.L                     | 105687433<br>2 | 0.0247837<br>45 | 3981.7455<br>73 | 1.520138<br>699 |

|             |                                      |             |            |             |          |                |                 |                 |                 |
|-------------|--------------------------------------|-------------|------------|-------------|----------|----------------|-----------------|-----------------|-----------------|
| 15.6919788  | Naphthalene, 1,2-dihydro-            | 83.04867473 | C10H10     | 259389.6214 | NIST14.L | 105687433<br>2 | 0.0245430<br>9  | 3959.5225<br>73 | 1.526476<br>87  |
| 18.03183073 | Acetic acid, 2-fluoroethyl ester     | 87.02567937 | C4H7FO2    | 258287.295  | NIST14.L | 105687433<br>2 | 0.0244387<br>9  | 3937.2995<br>73 | 1.524387<br>629 |
| 9.188128957 | 1-Decene                             | 94.30161764 | C10H20     | 257379.0497 | NIST14.L | 105687433<br>2 | 0.0243528<br>53 | 3915.0765<br>73 | 1.521132<br>578 |
| 63.81618053 | Dodecane, 2,6,11-trimethyl-          | 85.76509535 | C15H32     | 252092.9802 | NIST14.L | 105687433<br>2 | 0.0238526<br>92 | 3892.8535<br>73 | 1.544213<br>397 |
| 6.916402034 | Vinyl crotonate                      | 84.89079042 | C6H8O2     | 250164.917  | NIST14.L | 105687433<br>2 | 0.0236702<br>61 | 3870.6305<br>73 | 1.547231<br>57  |
| 3.465445066 | Octane                               | 90.09464558 | C8H18      | 248226.7651 | NIST14.L | 105687433<br>2 | 0.0234868<br>76 | 3848.4075<br>73 | 1.550359<br>636 |
| 30.39193127 | 1H-Tetrazole, 1,5-dimethyl-          | 82.05404931 | C3H6N4     | 247582.9533 | NIST14.L | 105687433<br>2 | 0.0234259<br>6  | 3826.1845<br>73 | 1.545415<br>192 |
| 18.86014116 | 2-Acetyl-2-methyltetrahydrofuran     | 85.56518542 | C7H12O2    | 245932.5444 | NIST14.L | 105687433<br>2 | 0.0232698       | 3803.9615<br>73 | 1.546749<br>977 |
| 20.05228707 | 2,3-Anhydro-d-mannosan               | 82.1196919  | C6H8O4     | 242557.3585 | NIST14.L | 105687433<br>2 | 0.0229504<br>45 | 3781.7385<br>73 | 1.559111<br>048 |
| 21.06535666 | Benzene, (1,3-dimethylbutyl)-        | 84.87593269 | C12H18     | 242122.2149 | NIST14.L | 105687433<br>2 | 0.0229092<br>72 | 3270.6095<br>73 | 1.350809<br>373 |
| 10.58007761 | Limonene                             | 88.21872813 | C10H16     | 241131.5374 | NIST14.L | 105687433<br>2 | 0.0228155<br>35 | 3248.3865<br>73 | 1.347142<br>978 |
| 6.423887097 | Acetaldehyde, dimethylhydrazone      | 82.43757866 | C4H10N2    | 237845.0543 | NIST14.L | 105687433<br>2 | 0.0225045<br>73 | 3226.1635<br>73 | 1.356413<br>983 |
| 18.85987847 | 3H-1,2,4-Triazol-3-one, 1,2-dihydro- | 87.12562079 | C2H3N3O    | 235971.2444 | NIST14.L | 105687433<br>2 | 0.0223272<br>76 | 3203.9405<br>73 | 1.357767<br>376 |
| 3.584078325 | 4-Octene, (E)-                       | 80.64392242 | C8H16      | 235503.0242 | NIST14.L | 105687433<br>2 | 0.0222829<br>73 | 3181.7175<br>73 | 1.351030<br>452 |
| 3.842784512 | Pyridine, 2-methyl-                  | 85.29518594 | C6H7N      | 234414.2486 | NIST14.L | 105687433<br>2 | 0.0221799<br>55 | 3159.4945<br>73 | 1.347825<br>31  |
| 9.188910978 | Cyclopropane, 1-hexyl-2-methyl-      | 92.15951646 | C10H20     | 230293.1235 | NIST14.L | 105687433<br>2 | 0.0217900<br>2  | 3137.2715<br>73 | 1.362294<br>942 |
| 56.72077935 | Linoleic acid ethyl ester            | 82.42811832 | C20H36O2   | 230080.2525 | NIST14.L | 105687433<br>2 | 0.0217698<br>78 | 3115.0485<br>73 | 1.353896<br>538 |
| 6.940678482 | 1H-Pyrrole, 2,5-dimethyl-            | 85.80214948 | C6H9N      | 225987.5033 | NIST14.L | 105687433<br>2 | 0.0213826<br>28 | 3092.8255<br>73 | 1.368582<br>567 |
| 5.934253551 | Nonane                               | 82.96746159 | C9H20      | 223689.8442 | NIST14.L | 105687433<br>2 | 0.0211652<br>26 | 3070.6025<br>73 | 1.372705<br>401 |
| 7.96974019  | 1-Hexanone, 5-methyl-1-phenyl-       | 80.57864065 | C13H18O    | 221827.7508 | NIST14.L | 105687433<br>2 | 0.0209890<br>38 | 2559.4735<br>73 | 1.153811<br>263 |
| 4.160574736 | 1-Propene, 3-azido-                  | 86.34663921 | C3H5N3     | 217961.3324 | NIST14.L | 105687433<br>2 | 0.0206232<br>02 | 2537.2505<br>73 | 1.164082<br>888 |
| 62.43873621 | Oxalic acid, allyl decyl ester       | 85.20124815 | C15H26O4   | 213503.4501 | NIST14.L | 105687433<br>2 | 0.0202014<br>04 | 2515.0275<br>73 | 1.177979<br>828 |
| 15.64101379 | Benzene, 1-methyl-4-(1-propynyl)-    | 81.90457634 | C10H10     | 212880.3339 | NIST14.L | 105687433<br>2 | 0.0201424<br>45 | 2492.8045<br>73 | 1.170988<br>662 |
| 5.188443703 | 2-Propanone, 1-(acetyloxy)-          | 91.07276413 | C5H8O3     | 212837.6097 | NIST14.L | 105687433<br>2 | 0.0201384<br>03 | 2470.5815<br>73 | 1.160782<br>428 |
| 25.20993515 | Benzene, heptyl-                     | 84.61473202 | C13H20     | 207036.2523 | NIST14.L | 105687433<br>2 | 0.0195894<br>86 | 2448.3585<br>73 | 1.182574<br>813 |
| 10.5774588  | D-Limonene                           | 86.45163667 | C10H16     | 205627.2453 | NIST14.L | 105687433<br>2 | 0.0194561<br>68 | 2426.1355<br>73 | 1.179870<br>678 |
| 11.12892338 | Benzene, 1-propynyl-                 | 82.10796151 | C9H8       | 203983.1133 | NIST14.L | 105687433<br>2 | 0.0193006<br>02 | 2403.9125<br>73 | 1.178486<br>069 |
| 66.43531637 | 3-Ethyl-3-methylheptane              | 84.19512976 | C10H22     | 194753.4581 | NIST14.L | 105687433<br>2 | 0.0184273<br>05 | 2381.6895<br>73 | 1.222925<br>434 |
| 16.61940171 | Benzene, (1-methylbutyl)-            | 92.17862508 | C11H16     | 194363.311  | NIST14.L | 105687433<br>2 | 0.0183903<br>9  | 2359.4665<br>73 | 1.213946<br>481 |
| 21.59611199 | 1H-Inden-1-one, 2,3-dihydro-         | 91.21936557 | C9H8O      | 189206.5234 | NIST14.L | 105687433<br>2 | 0.0179024<br>62 | 2337.2435<br>73 | 1.235286<br>993 |
| 18.31791691 | Heptanediamide, N,N'-di-benzoyloxy-  | 80.88133881 | C21H22N2O6 | 187167.0796 | NIST14.L | 105687433<br>2 | 0.0177094<br>92 | 2315.0205<br>73 | 1.236873<br>802 |

|             |                                                       |             |           |             |          |                |                      |                 |                 |
|-------------|-------------------------------------------------------|-------------|-----------|-------------|----------|----------------|----------------------|-----------------|-----------------|
| 3.465727609 | Pentane, 2,2-dimethyl-                                | 83.93289317 | C7H16     | 186602.3587 | NIST14.L | 105687433<br>2 | 0.0176560<br>59      | 2292.7975<br>73 | 1.228707<br>713 |
| 54.54214032 | Sulfurous acid, 2-ethylhexyl hexyl ester              | 81.94322193 | C14H30O3S | 184143.246  | NIST14.L | 105687433<br>2 | 0.0174233<br>81      | 2270.5745<br>73 | 1.233047<br>979 |
| 3.583747667 | 1,2-Cyclohexanedione                                  | 89.30687093 | C6H8O2    | 183588.7005 | NIST14.L | 105687433<br>2 | 0.0173709<br>11      | 2248.3515<br>73 | 1.224667<br>732 |
| 14.07563816 | Cyclopentane, hexyl-                                  | 81.68188024 | C11H22    | 182248.3066 | NIST14.L | 105687433<br>2 | 0.0172440<br>85      | 2226.1285<br>73 | 1.221481<br>075 |
| 8.287324307 | 2,3-Pentanedione                                      | 86.65120537 | C5H8O2    | 181051.0479 | NIST14.L | 105687433<br>2 | 0.0171308<br>02      | 2203.9055<br>73 | 1.217284<br>074 |
| 61.00345987 | Decane, 3,8-dimethyl-                                 | 84.24353237 | C12H26    | 180301.0025 | NIST14.L | 105687433<br>2 | 0.0170598<br>34      | 2181.6825<br>73 | 1.210022<br>431 |
| 62.4388907  | Octane, 2,4,6-trimethyl-                              | 85.80879581 | C11H24    | 180145.9328 | NIST14.L | 105687433<br>2 | 0.0170451<br>61      | 2159.4595<br>73 | 1.198727<br>909 |
| 66.84376747 | Vitamin E                                             | 92.6769218  | C29H50O2  | 179811.6463 | NIST14.L | 105687433<br>2 | 0.0170135<br>31      | 2137.2365<br>73 | 1.188597<br>411 |
| 3.342573047 | Propanoic acid, 2-oxo-, methyl ester                  | 91.20344765 | C4H6O3    | 179653.9351 | NIST14.L | 105687433<br>2 | 0.0169986<br>09      | 2115.0135<br>73 | 1.177270<br>942 |
| 21.75324153 | Phenol, 4-ethyl-2-methoxy-                            | 83.52947605 | C9H12O2   | 179271.0738 | NIST14.L | 105687433<br>2 | 0.0169623<br>83      | 2092.7905<br>73 | 1.167388<br>876 |
| 14.07579121 | 3-Undecene, (E)-                                      | 80.85194993 | C11H22    | 178997.689  | NIST14.L | 105687433<br>2 | 0.0169365<br>16      | 2070.5675<br>73 | 1.156756<br>596 |
| 2.966360821 | 1-Hydroxy-2-butanone                                  | 80.25681507 | C4H8O2    | 178508.5122 | NIST14.L | 105687433<br>2 | 0.0168902<br>31      | 2048.3445<br>73 | 1.147477<br>254 |
| 3.581542211 | 2-Heptene, 3-methyl-                                  | 87.36664616 | C8H16     | 176842.5196 | NIST14.L | 105687433<br>2 | 0.0167325<br>97      | 2026.1215<br>73 | 1.145720<br>824 |
| 7.080711739 | Pyridine, 2,5-dimethyl-                               | 89.87270661 | C7H9N     | 175478.2298 | NIST14.L | 105687433<br>2 | 0.0166035<br>09      | 2003.8985<br>73 | 1.141964<br>206 |
| 21.99241223 | Naphthalene, 2-methyl-                                | 85.11563014 | C11H10    | 175456.1729 | NIST14.L | 105687433<br>2 | 0.0166014<br>22      | 1981.6755<br>73 | 1.129441<br>923 |
| 77.90960641 | 1-[1,2,4]Triazol-1-ylethanone                         | 83.69794999 | C4H5N3O   | 173760.3909 | NIST14.L | 105687433<br>2 | 0.0164409<br>7       | 1959.4525<br>73 | 1.127675<br>049 |
| 63.81908343 | Octane, 2,7-dimethyl-                                 | 92.57056966 | C10H22    | 170429.6011 | NIST14.L | 105687433<br>2 | 0.0161258<br>15      | 1937.2295<br>73 | 1.136674<br>358 |
| 15.94268498 | 2-Methylindene                                        | 84.43401075 | C10H10    | 169719.9703 | NIST14.L | 105687433<br>2 | 0.0160586<br>71      | 1915.0065<br>73 | 1.128333<br>083 |
| 19.67422414 | 1H-Benzimidazole, 5,6-dimethyl-                       | 81.72163131 | C9H10N2   | 168851.6963 | NIST14.L | 105687433<br>2 | 0.0159765<br>16      | 1892.7835<br>73 | 1.120973<br>976 |
| 7.657137671 | 4,5-Dihydro-2(1H)-pentalenone                         | 94.15932273 | C8H8O     | 168593.9587 | NIST14.L | 105687433<br>2 | 0.0159521<br>29      | 1870.5605<br>73 | 1.109506<br>288 |
| 7.661008884 | Benzene, propyl-                                      | 92.04893245 | C9H12     | 168264.9605 | NIST14.L | 105687433<br>2 | 0.015921<br>0.015921 | 1848.3375<br>73 | 1.098468<br>492 |
| 18.04381207 | CH3NHCH2CN                                            | 83.12185943 | C3H6N2    | 167085.5089 | NIST14.L | 105687433<br>2 | 0.0158094<br>02      | 1171.1145<br>73 | 0.700907<br>326 |
| 41.73194492 | 2-Methyl-1-undecanol                                  | 81.50484002 | C12H26O   | 165802.0979 | NIST14.L | 105687433<br>2 | 0.0156879<br>67      | 448.89157<br>33 | 0.270739<br>381 |
| 16.37391737 | 4-(2-Ethylhexoxy)ethylbenzene                         | 80.66531653 | C16H26O   | 165708.7933 | NIST14.L | 105687433<br>2 | 0.0156791<br>39      | 16127.293<br>41 | 9.732309<br>965 |
| 9.531337709 | Undecane, 3,5-dimethyl-                               | 87.02557121 | C13H28    | 164683.134  | NIST14.L | 105687433<br>2 | 0.0155820<br>92      | 13587.134<br>12 | 8.250470<br>943 |
| 54.78647827 | Pentadecanal-                                         | 81.87982239 | C15H30O   | 163275.7133 | NIST14.L | 105687433<br>2 | 0.0154489<br>24      | 12694.539<br>03 | 7.774909<br>55  |
| 61.67201657 | 1,4-Benzenedicarboxylic acid, bis(2-ethylhexyl) ester | 86.79904931 | C24H38O4  | 161597.1645 | NIST14.L | 105687433<br>2 | 0.0152901<br>02      | 12581.252<br>55 | 7.785565<br>17  |
| 17.135808   | Naphthalene                                           | 87.60138952 | C10H8     | 160231.3906 | NIST14.L | 105687433<br>2 | 0.0151608<br>74      | 12253.616<br>51 | 7.647450<br>643 |
| 18.03130564 | 2-Carbomethoxyaziridine                               | 86.74445568 | C4H7NO2   | 159170.7984 | NIST14.L | 105687433<br>2 | 0.0150605<br>23      | 11008.648<br>14 | 6.916248<br>618 |
| 18.93239998 | Crotonyl isothiocyanate                               | 83.62659657 | C5H5NOS   | 157673.7263 | NIST14.L | 105687433<br>2 | 0.0149188<br>72      | 9994.2091<br>65 | 6.338538<br>066 |



|             |                                                |             |          |             |          |                |                 |                 |                 |
|-------------|------------------------------------------------|-------------|----------|-------------|----------|----------------|-----------------|-----------------|-----------------|
| 7.345153862 | 4-Hexen-2-one                                  | 94.44404408 | C6H10O   | 149846.8796 | NIST14.L | 105687433<br>2 | 0.0141783<br>06 | 8552.3854<br>81 | 5.707416<br>466 |
| 54.5437748  | Undecane, 3,8-dimethyl-                        | 85.46403704 | C13H28   | 147477.1178 | NIST14.L | 105687433<br>2 | 0.0139540<br>83 | 4362.2662<br>79 | 2.957927<br>538 |
| 62.54013852 | Pentanamide                                    | 81.43338445 | C5H11NO  | 142306.6837 | NIST14.L | 105687433<br>2 | 0.0134648<br>63 | 4852.9678<br>76 | 3.410217<br>811 |
| 27.17112912 | 7-Tetradecene, (Z)-                            | 84.45240409 | C14H28   | 141464.4014 | NIST14.L | 105687433<br>2 | 0.0133851<br>68 | 2731.1470<br>54 | 1.930624<br>968 |
| 79.58940605 | 5H-Tetrazol-5-amine                            | 90.28699395 | CH3N5    | 134718.5049 | NIST14.L | 105687433<br>2 | 0.0127468<br>8  | 3703.5063<br>38 | 2.749070<br>249 |
| 25.21243076 | Benzeneacetic acid, 2-propenyl ester           | 81.03607333 | C11H12O2 | 134412.8084 | NIST14.L | 105687433<br>2 | 0.0127179<br>56 | 1147.6750<br>67 | 0.853843<br>529 |
| 3.448592519 | 1H-Tetrazol-5-amine                            | 91.73372191 | CH3N5    | 133357.4713 | NIST14.L | 105687433<br>2 | 0.0126181<br>01 | 7377.8534<br>6  | 5.532388<br>541 |
| 17.48717455 | Cyclohexene, 3,4-diethenyl-, cis-              | 81.90203985 | C10H14   | 132484.8749 | NIST14.L | 105687433<br>2 | 0.0125355<br>37 | 6179.1095<br>14 | 4.664011<br>284 |
| 8.622201345 | Benzene, 1,2,3-trimethyl-                      | 81.93669183 | C9H12    | 131686.6773 | NIST14.L | 105687433<br>2 | 0.0124600<br>13 | 174.85445<br>06 | 0.132780<br>669 |
| 50.58403699 | Decane, 6-ethyl-2-methyl-                      | 88.8331261  | C13H28   | 131533.5066 | NIST14.L | 105687433<br>2 | 0.0124455<br>2  | 2198.3487<br>57 | 1.671322<br>247 |
| 38.37090705 | 2-Methylbenzylamine, N,N-diheptyl-             | 80.19749935 | C22H39N  | 131324.3329 | NIST14.L | 105687433<br>2 | 0.0124257<br>28 | 2017.8847<br>85 | 1.536565<br>799 |
| 8.622851853 | Benzene, 1-ethyl-4-methyl-                     | 83.70971905 | C9H12    | 127802.0874 | NIST14.L | 105687433<br>2 | 0.0120924<br>58 | 1920.2374<br>78 | 1.502508<br>698 |
| 3.458674535 | 2,4-Dimethyl-oxetane                           | 80.03986126 | C5H10O   | 119634.8127 | NIST14.L | 105687433<br>2 | 0.0113196<br>82 | 20538.410<br>38 | 17.16758<br>685 |
| 8.429623688 | Propanoic acid, 1-methylpropyl ester           | 83.33979023 | C7H14O2  | 119604.5277 | NIST14.L | 105687433<br>2 | 0.0113168<br>16 | 1720.7007<br>14 | 1.438658<br>509 |
| 57.83100529 | Oxalic acid, allyl hexadecyl ester             | 83.35774693 | C21H38O4 | 119057.9559 | NIST14.L | 105687433<br>2 | 0.0112651<br>01 | 3089.8130<br>13 | 2.595217<br>59  |
| 25.42952877 | Benzene, (1-methylhexyl)-                      | 80.15855228 | C13H20   | 114238.8889 | NIST14.L | 105687433<br>2 | 0.0108091<br>27 | 1804.1780<br>94 | 1.579302<br>907 |
| 3.028947865 | 2-Methoxy-1,3-dioxolane                        | 85.33236201 | C4H8O3   | 113732.8725 | NIST14.L | 105687433<br>2 | 0.0107612<br>48 | 1157.2592<br>27 | 1.017523<br>959 |
| 18.90279856 | 4-Hexen-3-one                                  | 89.23357487 | C6H10O   | 113245.2928 | NIST14.L | 105687433<br>2 | 0.0107151<br>14 | 8765.0107<br>44 | 7.739845<br>541 |
| 11.30851651 | Benzeneacetaldehyde                            | 86.24949333 | C8H8O    | 109934.6796 | NIST14.L | 105687433<br>2 | 0.0104018<br>69 | 8535.6116<br>63 | 7.764257<br>553 |
| 21.98357316 | 1H-Indene-1-methanol, .alpha.-methyl-, acetate | 90.17092238 | C13H14O2 | 108330.965  | NIST14.L | 105687433<br>2 | 0.0102501<br>27 | 16298.516<br>56 | 15.04511<br>343 |
| 7.358700645 | 2(5H)-Furanone, 5-methyl-                      | 87.34120209 | C5H6O2   | 107640.6572 | NIST14.L | 105687433<br>2 | 0.0101848<br>11 | 7641.6834<br>39 | 7.099253<br>794 |
| 38.23157432 | Decane, 3-chloro-                              | 81.70753938 | C10H21Cl | 107582.2028 | NIST14.L | 105687433<br>2 | 0.0101792<br>81 | 5930.1439<br>43 | 5.512197<br>919 |
| 41.96737308 | Heptane, 2,6-dimethyl-                         | 86.52515297 | C9H20    | 102699.1356 | NIST14.L | 105687433<br>2 | 0.0097172<br>51 | 1995.6429<br>33 | 1.943193<br>505 |
| 38.23152144 | 1-Octene, 6-methyl-                            | 83.50570537 | C9H18    | 102093.9708 | NIST14.L | 105687433<br>2 | 0.0096599<br>92 | 515.44229<br>38 | 0.504870<br>454 |
| 53.12944859 | Norbornane, 2-isobutyl-                        | 83.94063799 | C11H20   | 100110.4017 | NIST14.L | 105687433<br>2 | 0.0094723<br>09 | 1241.7511<br>43 | 1.240381<br>741 |
| 41.96711604 | Decane, 2,4-dimethyl-                          | 85.69520721 | C12H26   | 99072.94445 | NIST14.L | 105687433<br>2 | 0.0093741<br>46 | 1082.4988<br>74 | 1.092628<br>144 |
| 15.83510353 | 5-Pentylcyclohexa-1,3-diene                    | 85.30643073 | C11H18   | 95927.54037 | NIST14.L | 105687433<br>2 | 0.0090765<br>32 | 11515.241<br>07 | 12.00410<br>334 |
| 18.87805895 | 2-(E)-Hexen-1-ol, (4S)-4-amino-5-methyl-       | 80.97110983 | C7H15NO  | 95084.46621 | NIST14.L | 105687433<br>2 | 0.0089967<br>62 | 1535.3409<br>53 | 1.614712<br>701 |
| 12.18404394 | Benzene, 1-methyl-4-propyl-                    | 83.83516866 | C10H14   | 94704.83653 | NIST14.L | 105687433<br>2 | 0.0089608<br>42 | 2799.5039<br>06 | 2.956030<br>556 |
| 9.398983506 | 1,3-Cyclohexanedione                           | 84.67017631 | C6H8O2   | 94451.01786 | NIST14.L | 105687433<br>2 | 0.0089368<br>26 | 9049.5211<br>8  | 9.581179<br>097 |
| 8.421583843 | Allyl thiopropionate                           | 84.63186745 | C6H10O5  | 94108.65464 | NIST14.L | 105687433<br>2 | 0.0089044<br>32 | 9551.6552<br>35 | 8.149603<br>426 |

|             |                                                             |             |                 |             |          |                |                 |                 |                 |
|-------------|-------------------------------------------------------------|-------------|-----------------|-------------|----------|----------------|-----------------|-----------------|-----------------|
| 30.48854007 | 1H-Indole, 2,5-dimethyl-                                    | 81.2118312  | C10H11N         | 92967.73052 | NIST14.L | 105687433<br>2 | 0.0087964<br>79 | 10325.348<br>14 | 7.106378<br>61  |
| 65.15281254 | Decane, 1-iodo-                                             | 83.93449048 | C10H21I         | 92646.79475 | NIST14.L | 105687433<br>2 | 0.0087661<br>13 | 9566.5537<br>72 | 8.325833<br>503 |
| 64.09440918 | Cyclopentaneethanol, .beta.,2,3-trimethyl-                  | 84.63794238 | C10H20O         | 91747.86948 | NIST14.L | 105687433<br>2 | 0.0086810<br>58 | 9815.1961<br>32 | 6.698009<br>87  |
| 11.30863533 | Spiro[2,4]hepta-4,6-diene                                   | 87.83676925 | C7H8            | 87882.00621 | NIST14.L | 105687433<br>2 | 0.0083152<br>75 | 7290.5765<br>78 | 8.295869<br>533 |
| 63.80694386 | 2H-Pyran, 3,4-dihydro-6-methyl-                             | 83.04196742 | C6H10O          | 85125.76458 | NIST14.L | 105687433<br>2 | 0.0080544<br>83 | 6649.2755<br>7  | 7.811119<br>938 |
| 50.45761747 | 1-Tetradecyne                                               | 85.8524861  | C14H26          | 85117.83186 | NIST14.L | 105687433<br>2 | 0.0080537<br>33 | 6707.5481<br>27 | 7.880308<br>956 |
| 4.820757641 | 2-Butanone                                                  | 84.08560222 | C4H8O           | 84607.85383 | NIST14.L | 105687433<br>2 | 0.0080054<br>79 | 5057.4572<br>93 | 5.977526<br>984 |
| 16.50168256 | 2,3-Furandione, dihydro-4,4-dimethyl-                       | 82.99141845 | C6H8O3          | 83774.86161 | NIST14.L | 105687433<br>2 | 0.0079266<br>63 | 5818.7170<br>23 | 6.945659<br>964 |
| 20.08074635 | Sulfoxide, methyl phenethyl                                 | 80.08568556 | C9H12OS         | 83747.76438 | NIST14.L | 105687433<br>2 | 0.0079240<br>99 | 5391.3557<br>53 | 6.437611<br>55  |
| 8.421916156 | Oxalic acid, isobutyl propyl ester                          | 83.53634075 | C9H16O4         | 82181.93097 | NIST14.L | 105687433<br>2 | 0.0077759<br>42 | 4092.8605<br>73 | 4.980243<br>863 |
| 50.45136735 | Cyclohexanepropanol-                                        | 81.31867854 | C9H18O          | 81218.07881 | NIST14.L | 105687433<br>2 | 0.0076847<br>43 | 4070.6375<br>73 | 5.011984<br>564 |
| 50.45571772 | Cyclohexaneethanol                                          | 84.85948085 | C8H16O          | 79580.26304 | NIST14.L | 105687433<br>2 | 0.0075297<br>75 | 4048.4145<br>73 | 5.087209<br>339 |
| 27.17190741 | 6-Tridecene, 7-methyl-                                      | 86.51381299 | C14H28          | 79486.53452 | NIST14.L | 105687433<br>2 | 0.0075209<br>07 | 4026.1915<br>73 | 5.065249<br>854 |
| 27.1722131  | Cyclopentane, 1,1-dimethyl-                                 | 83.42160803 | C7H14           | 78814.74188 | NIST14.L | 105687433<br>2 | 0.0074573<br>43 | 4003.9685<br>73 | 5.080227<br>985 |
| 10.44305124 | Benzenamine, 4-methoxy-                                     | 81.98158855 | C7H9NO          | 78588.85038 | NIST14.L | 105687433<br>2 | 0.0074359<br>69 | 3981.7455<br>73 | 5.066552<br>767 |
| 10.48316078 | Benzeneethanol, .beta.-ethenyl-                             | 90.69545301 | C10H12O         | 78548.29772 | NIST14.L | 105687433<br>2 | 0.0074321<br>32 | 3959.5225<br>73 | 5.040876<br>363 |
| 56.30296541 | 3,5-Dimethyl-4-octanone                                     | 80.20211874 | C10H20O         | 78450.39825 | NIST14.L | 105687433<br>2 | 0.0074228<br>69 | 3937.2995<br>73 | 5.018839<br>497 |
| 17.70166432 | Furan, 2,3-dihydro-                                         | 84.1005643  | C4H6O           | 78220.48258 | NIST14.L | 105687433<br>2 | 0.0074011<br>15 | 3915.0765<br>73 | 5.005180<br>797 |
| 53.13811223 | 2,2'-Bi-1,3-dioxolane                                       | 85.57290023 | C6H10O4         | 78213.55599 | NIST14.L | 105687433<br>2 | 0.0074004<br>59 | 3892.8535<br>73 | 4.977210<br>822 |
| 25.43352701 | 1-Methyl-2-n-hexylbenzene                                   | 83.5729159  | C13H20          | 78165.86509 | NIST14.L | 105687433<br>2 | 0.0073959<br>47 | 3870.6305<br>73 | 4.951816<br>972 |
| 7.358557283 | 2,4-Azetidinedione, 3,3-diethyl-1-methyl-                   | 89.01097112 | C8H13NO2        | 77857.07222 | NIST14.L | 105687433<br>2 | 0.0073667<br>29 | 3848.4075<br>73 | 4.942913<br>294 |
| 29.66638041 | Benzene, (1-methylheptyl)-                                  | 84.59226876 | C14H22          | 76798.7627  | NIST14.L | 105687433<br>2 | 0.0072665<br>94 | 3826.1845<br>73 | 4.982091<br>428 |
| 18.53734066 | 5-Undecene, 8-methyl-, (E)-                                 | 84.19996469 | C12H24          | 76267.62451 | NIST14.L | 105687433<br>2 | 0.0072163<br>38 | 3803.9615<br>73 | 4.987649<br>212 |
| 57.95952112 | Nonane, 2,2,4,4,6,8,8-heptamethyl-                          | 80.37799038 | C16H34          | 76154.18901 | NIST14.L | 105687433<br>2 | 0.0072056<br>05 | 3781.7385<br>73 | 4.965896<br>982 |
| 8.423249352 | 2-Butanone, 1-(acetyloxy)-                                  | 87.93532776 | C6H10O3         | 74017.0659  | NIST14.L | 105687433<br>2 | 0.0070033<br>93 | 3759.5155<br>73 | 5.079255<br>071 |
| 8.423150409 | Ethane-1,1-diol dipropanoate                                | 83.00336194 | C8H14O4         | 71660.86235 | NIST14.L | 105687433<br>2 | 0.0067804<br>53 | 3737.2925<br>73 | 5.215249<br>232 |
| 22.66999126 | Succinic acid, 2,4,6-trichlorophenyl 2-naphthylmethyl ester | 84.0550809  | C21H15Cl3O<br>4 | 71524.39298 | NIST14.L | 105687433<br>2 | 0.0067675<br>4  | 3715.0695<br>73 | 5.194129<br>469 |
| 10.8628572  | 1,4-Cyclohex-2-enedione                                     | 81.89728629 | C6H6O2          | 71322.09406 | NIST14.L | 105687433<br>2 | 0.0067483<br>99 | 3692.8465<br>73 | 5.177703<br>518 |
| 24.49062416 | 2,5,6-Trimethylbenzimidazole                                | 80.86318256 | C10H12N2        | 69308.80204 | NIST14.L | 105687433<br>2 | 0.0065579<br>04 | 3670.6235<br>73 | 5.296042<br>444 |
| 9.709461536 | 2-Furanone, 2,5-dihydro-3,5-dimethyl                        | 83.63684449 | C6H8O2          | 69029.21203 | NIST14.L | 105687433<br>2 | 0.0065314<br>49 | 3648.4005<br>73 | 5.285299<br>464 |

|             |                                                 |             |                 |             |          |                |                 |                 |                 |
|-------------|-------------------------------------------------|-------------|-----------------|-------------|----------|----------------|-----------------|-----------------|-----------------|
| 57.95531541 | Hexane, 3,3-dimethyl-                           | 82.76061502 | C8H18           | 68913.22616 | NIST14.L | 105687433<br>2 | 0.0065204<br>75 | 3626.1775<br>73 | 5.261947<br>198 |
| 10.47597823 | Indane                                          | 88.61345439 | C9H10           | 67825.31623 | NIST14.L | 105687433<br>2 | 0.0064175<br>38 | 3603.9545<br>73 | 5.313583<br>148 |
| 53.15158379 | N-Ethylformamide                                | 91.2847327  | C3H7NO          | 65485.8414  | NIST14.L | 105687433<br>2 | 0.0061961<br>81 | 3581.7315<br>73 | 5.469474<br>77  |
| 50.45120516 | Cyclohexane, cyclopropyl-                       | 84.26306549 | C9H16           | 64994.34894 | NIST14.L | 105687433<br>2 | 0.0061496<br>76 | 3559.5085<br>73 | 5.476643<br>172 |
| 37.69585025 | 2-Pentyn-4-one                                  | 81.74732147 | C5H6O           | 61843.53665 | NIST14.L | 105687433<br>2 | 0.0058515<br>51 | 3537.2855<br>73 | 5.719733<br>645 |
| 6.111132163 | Pyridine, 2-ethyl-                              | 86.21899033 | C7H9N           | 60014.13943 | NIST14.L | 105687433<br>2 | 0.0056784<br>56 | 3515.0625<br>73 | 5.857057<br>364 |
| 31.57692261 | Cyclohexane, 1,2-dimethyl-, cis-                | 82.50792915 | C8H16           | 59109.59077 | NIST14.L | 105687433<br>2 | 0.0055928<br>68 | 3492.8395<br>73 | 5.909091<br>11  |
| 21.32831366 | Pyrazine, 2-methyl-5-(1-methylethyl)-           | 82.13654851 | C8H12N2         | 58472.78732 | NIST14.L | 105687433<br>2 | 0.0055326<br>15 | 3470.6165<br>73 | 5.935438<br>915 |
| 13.05533785 | 2,4,5-Trihydroxypyrimidine                      | 84.59579464 | C4H4N2O3        | 58095.56679 | NIST14.L | 105687433<br>2 | 0.0054969<br>23 | 3448.3935<br>73 | 5.935725<br>846 |
| 14.24928111 | 1H-Indole, 2,3-dihydro-                         | 83.45151148 | C8H9N           | 57922.37326 | NIST14.L | 105687433<br>2 | 0.0054805<br>36 | 3426.1705<br>73 | 5.915107<br>376 |
| 35.02327928 | Cyclooctane, 1,4-dimethyl-, trans-              | 85.30966424 | C10H20          | 57898.61371 | NIST14.L | 105687433<br>2 | 0.0054782<br>87 | 3403.9475<br>73 | 5.879152<br>117 |
| 41.18829543 | 2-Oxobicyclo(3.2.2)nona-3,6-dien-1-yl benzoate  | 81.17026918 | C16H14O3        | 57498.54649 | NIST14.L | 105687433<br>2 | 0.0054404<br>34 | 3381.7245<br>73 | 5.881408<br>801 |
| 3.748092015 | Cyclopropane, [(1-propenyloxy)methyl]-          | 83.39955826 | C7H12O          | 56121.15019 | NIST14.L | 105687433<br>2 | 0.0053101<br>06 | 3359.5015<br>73 | 5.986159<br>518 |
| 45.38000978 | 1H-Indene, 2-phenyl-                            | 83.79472459 | C15H12          | 55723.81176 | NIST14.L | 105687433<br>2 | 0.0052725<br>11 | 3337.2785<br>73 | 5.988963<br>188 |
| 14.41922331 | 1-Pentanol, 2-methyl-                           | 94.26327667 | C6H14O          | 54384.87987 | NIST14.L | 105687433<br>2 | 0.0051458<br>23 | 3315.0555<br>73 | 6.095546<br>374 |
| 21.32843863 | Phenol, 3-ethyl-5-methyl-                       | 80.42496536 | C9H12O          | 51480.43232 | NIST14.L | 105687433<br>2 | 0.0048710<br>08 | 3292.8325<br>73 | 6.396279<br>955 |
| 7.399606301 | Benzeneethanol, .beta.-ethenyl-.alpha.-methyl-  | 91.94503301 | C11H14O         | 44291.69345 | NIST14.L | 105687433<br>2 | 0.0041908<br>19 | 3270.6095<br>73 | 7.384250<br>452 |
| 15.59802863 | Benzene, 1-isocyano-3-methyl-                   | 85.36816622 | C8H7N           | 42967.36292 | NIST14.L | 105687433<br>2 | 0.0040655<br>13 | 3248.3865<br>73 | 7.560125<br>529 |
| 30.35971254 | 2-Heptyne-4-one                                 | 81.45817246 | C7H10O          | 42669.96485 | NIST14.L | 105687433<br>2 | 0.0040373<br>74 | 3226.1635<br>73 | 7.560736<br>422 |
| 56.2247937  | Cyclohexane, (2-methylpropyl)-                  | 80.16439102 | C10H20          | 42642.64739 | NIST14.L | 105687433<br>2 | 0.0040347<br>89 | 3203.9405<br>73 | 7.513465<br>438 |
| 12.96105616 | Indan, 1-methyl-                                | 80.53644055 | C10H12          | 41304.9599  | NIST14.L | 105687433<br>2 | 0.0039082<br>19 | 3181.7175<br>73 | 7.702991<br>557 |
| 10.94501255 | Bicyclo[2.2.2]oct-2-ene                         | 85.73039219 | C8H12           | 39996.68792 | NIST14.L | 105687433<br>2 | 0.0037844<br>32 | 3159.4945<br>73 | 7.899390<br>519 |
| 32.79941621 | Glutaric acid, ethyl 3-heptyl ester             | 82.11989377 | C14H26O4        | 39491.83514 | NIST14.L | 105687433<br>2 | 0.0037366<br>63 | 3137.2715<br>73 | 7.944101<br>767 |
| 13.02395411 | 1,2,4-Triazin-3-amine, 5,6-dimethyl-            | 90.71499989 | C5H8N4          | 39034.55904 | NIST14.L | 105687433<br>2 | 0.0036933<br>96 | 3115.0485<br>73 | 7.980232<br>516 |
| 40.04306092 | 3-Methylbenzoic acid, 2,5-dichlorophenyl ester  | 83.34237252 | C14H10Cl2O<br>2 | 38876.67297 | NIST14.L | 105687433<br>2 | 0.0036784<br>57 | 3092.8255<br>73 | 7.955479<br>05  |
| 7.408677935 | Propanoic acid, 2-methyl-, 3-phenylpropyl ester | 83.9649377  | C13H18O2        | 37910.33836 | NIST14.L | 105687433<br>2 | 0.0035870<br>24 | 3070.6025<br>73 | 8.099644<br>334 |
| 5.258782875 | 1,2,4-Triazine                                  | 81.78233106 | C3H3N3          | 37879.86582 | NIST14.L | 105687433<br>2 | 0.0035841<br>41 | 3048.3795<br>73 | 8.047493<br>06  |
| 10.3715088  | 2-Cyclopenten-1-one, 3,4-dimethyl-              | 81.3004937  | C7H10O          | 35484.6154  | NIST14.L | 105687433<br>2 | 0.0033575<br>06 | 3026.1565<br>73 | 8.528080<br>52  |
| 20.57428612 | 1H-Indene, 1,1-dimethyl-                        | 84.1692413  | C11H12          | 34904.68512 | NIST14.L | 105687433<br>2 | 0.0033026<br>33 | 3003.9335<br>73 | 8.606104<br>204 |
| 21.23819128 | Phenol, 4-butyl-                                | 81.76209852 | C10H14O         | 34118.87157 | NIST14.L | 105687433<br>2 | 0.0032282<br>81 | 2981.7105<br>73 | 8.739182<br>85  |

|             |                                             |             |            |             |          |                |                 |                 |                 |
|-------------|---------------------------------------------|-------------|------------|-------------|----------|----------------|-----------------|-----------------|-----------------|
| 40.06154958 | Piperazine-2,5-dione, 4-(4-methylbenzoyl)-  | 80.89643288 | C12H12N2O3 | 33542.74013 | NIST14.L | 105687433<br>2 | 0.0031737<br>68 | 2959.4875<br>73 | 8.823034<br>617 |
| 32.51575291 | 1-Methyl-3-phenyl-2,4,5-trioxoimidazolidine | 82.74020507 | C10H8N2O3  | 31759.03791 | NIST14.L | 105687433<br>2 | 0.0030049<br>97 | 2937.2645<br>73 | 9.248594<br>312 |
| 15.24752738 | Benzene, 4-ethenyl-1,2-dimethyl-            | 83.30042979 | C10H12     | 31489.29602 | NIST14.L | 105687433<br>2 | 0.0029794<br>74 | 2915.0415<br>73 | 9.257245<br>927 |
| 11.41202565 | Cyclopentene, 3-methyl-                     | 80.35305347 | C6H10      | 30049.50542 | NIST14.L | 105687433<br>2 | 0.0028432<br>43 | 2892.8185<br>73 | 9.626842<br>549 |
| 18.53586673 | 1,6-Diazabicyclo[4.1.0]heptane              | 86.5187159  | C5H10N2    | 28501.04206 | NIST14.L | 105687433<br>2 | 0.0026967<br>3  | 1870.5955<br>73 | 6.563253<br>263 |
| 7.201592311 | Furan, 2,3,5-trimethyl-                     | 82.92275893 | C7H10O     | 27273.81005 | NIST14.L | 105687433<br>2 | 0.0025806<br>11 | 1848.3725<br>73 | 6.777097<br>039 |
| 64.20723736 | Phthalic acid, cyclobutyl propyl ester      | 80.39184825 | C15H18O4   | 26990.14952 | NIST14.L | 105687433<br>2 | 0.0025537<br>71 | 1826.1495<br>73 | 6.765985<br>389 |
| 3.227108663 | 3-Hexanone, 2-methyl-                       | 85.58306738 | C7H14O     | 25385.6266  | NIST14.L | 105687433<br>2 | 0.0024019<br>53 | 803.92657<br>33 | 3.166857<br>316 |
| 15.72066746 | Dimethylaminoethyltrifluorophosphorane      | 83.84838702 | C4H11F3NP  | 25059.76434 | NIST14.L | 105687433<br>2 | 0.0023711<br>21 | 781.70357<br>33 | 3.119357<br>24  |
| 56.48761365 | Tetramethyl orthocarbonate                  | 80.13199951 | C5H12O4    | 24905.24957 | NIST14.L | 105687433<br>2 | 0.0023565<br>01 | 759.48057<br>33 | 3.049479<br>874 |
| 8.886463541 | Semioxamazine                               | 88.220641   | C2H5N3O2   | 23031.33946 | NIST14.L | 105687433<br>2 | 0.0021791<br>94 | 1737.2575<br>73 | 7.543015<br>795 |
| 61.23528366 | Oxirane, tetramethyl-                       | 80.04634622 | C6H12O     | 20711.31962 | NIST14.L | 105687433<br>2 | 0.0019596<br>77 | 815.03457<br>33 | 3.935213<br>15  |
| 7.193556266 | 1-(3H-imidazol-4-yl)ethanone                | 81.97769797 | C5H6N2O    | 19158.64179 | NIST14.L | 105687433<br>2 | 0.0018127<br>64 | 692.81157<br>33 | 3.616183<br>135 |
| 6.800938824 | 1H-Pyrrole-2-carboxaldehyde, 1-methyl-      | 83.79539911 | C6H7NO     | 17805.75421 | NIST14.L | 105687433<br>2 | 0.0016847<br>56 | 770.58857<br>33 | 4.327750<br>255 |
| 39.55789715 | 1-Butanol, 2-methyl-                        | 84.19103979 | C5H12O     | 17730.59871 | NIST14.L | 105687433<br>2 | 0.0016776<br>45 | 648.36557<br>33 | 3.656760<br>745 |
| 3.329520781 | Acetamide, 2,2'-thiobis-                    | 85.19248542 | C4H8N2O2S  | 17625.86447 | NIST14.L | 105687433<br>2 | 0.0016677<br>35 | 626.14257<br>33 | 3.552407<br>737 |
| 19.20936351 | Methanamine, 1-methoxy-N-methyl-N-nitroso-  | 82.54000977 | C3H8N2O2   | 16970.15051 | NIST14.L | 105687433<br>2 | 0.0016056<br>92 | 503.91957<br>33 | 2.969446<br>694 |
| 15.98655477 | Dimethylphosphinic fluoride                 | 83.77588696 | C2H6FOP    | 16958.97362 | NIST14.L | 105687433<br>2 | 0.0016046<br>35 | 781.69657<br>33 | 4.609338<br>932 |
| 61.2334108  | 2-Pentanone, 4-hydroxy-4-methyl-            | 85.48660619 | C6H12O2    | 16390.13665 | NIST14.L | 105687433<br>2 | 0.0015508<br>12 | 559.47357<br>33 | 3.413477<br>173 |
| 62.96663713 | Butanal, O-methyloxime                      | 82.77532777 | C5H11NO    | 15664.22303 | NIST14.L | 105687433<br>2 | 0.0014821<br>27 | 537.25057<br>33 | 3.429793<br>946 |
| 12.85059748 | 1H-Pyrazole, 5-methoxy-1,3-dimethyl-        | 86.71094567 | C6H10N2O   | 14904.2738  | NIST14.L | 105687433<br>2 | 0.0014102<br>22 | 515.02757<br>33 | 3.455569<br>727 |
| 36.37353957 | Pyrazine, isopropenyl-                      | 85.11752374 | C7H8N2     | 13461.8955  | NIST14.L | 105687433<br>2 | 0.0012737<br>46 | 792.80457<br>33 | 5.889249<br>203 |
| 60.59222936 | Propane, 1-(1-methylethoxy)-                | 84.72055873 | C6H14O     | 9692.905714 | NIST14.L | 105687433<br>2 | 0.0009171<br>29 | 770.58157<br>33 | 7.949954<br>286 |

**Table S30.** Py-GC/MS data for spent coffee grounds.

```

;lc1pncwgpps
;avance-version (17/02/22)
;1D version of noesyprph using presaturation during relaxation delay
;and mixing time
;using shaped pulse for off-resonance presaturation
;with cp-decoupling on f2 - channel during acquisition and end of presat time and mixing time
;
;$CLASS=HighRes
;$DIM=1D
;$TYPE=
;$SUBTYPE=
;$COMMENT=

prosol relations=<lcnmr>

#include <Avance.incl>
#include <Delay.incl>
#include <Grad.incl>

"d11=30m"
"d12=20u"

"p0=p1*cnst12"

"if (d1/p18 < 1) {l6=1;} else {l6=d1/p18;}"
"if (d2/p18 < 1) {l8=0;} else {l8=d2/p18;}"
"l7=trunc(d8/p18)"

"DELTA=d8-(p18*l7)"

"acqt0=-p0*2/3.1416"

1 ze
  d12 pl14:f2
2 30m do:f2

# ifdef FLAG_BLK
  4u BLKGRAD
# else
  4u
# endif /*FLAG_BLK*/

3 p18:sp6:f1 ph29
  4u
  lo to 3 times l6
  4u cpd2:f2
  4 p18:sp6:f1 ph29
  4u
  lo to 4 times l8
  4u do:f2
  50u UNBLKGRAD
  p16:gp1
  d16 pl1:f1
  p1 ph1
  4u
  p1 ph2
  d12 cpd2:f2
  DELTA
  5 p18:sp6:f1 ph29

```

```

4u
lo to 5 times l7
p16:gp2
d16 pl1:f1

# ifdef FLAG_BLK
4u
# else
4u BLKGRAD
# endif /*FLAG_BLK*/

p0 ph3
go=2 ph31
30m do:f2 mc #0 to 2 F0(zd)

# ifdef FLAG_BLK
4u BLKGRAD
# else
4u
# endif /*FLAG_BLK*/

exit

ph1=0 2
ph2=0 0 0 0 0 0 0 2 2 2 2 2 2 2 2
ph3=0 0 2 2 1 1 3 3
ph29=0
ph31=0 2 2 0 1 3 3 1 2 0 0 2 3 1 1 3

;p11 : f1 channel - power level for pulse (default)
;p14: f2 channel - power level for low power cpd decoupling
;sp6: f1 channel - shaped pulse for presaturation
;p0 : for any flip angle
;p1 : f1 channel - 90 degree high power pulse
;p16: homospoil/gradient pulse
;p18: f1 channel - presaturation using shaped pulse
;p31: f2 channel - 90 degree pulse for low power decoupling sequence
;d1 : relaxation delay; 1-5 * T1 [ca. 1-2sec]
;d2: relaxation delay with decoupling [e.g. 1s]
;d8 : mixing time [ca. 80 msec]
;d11: delay for disk I/O [30 msec]
;d12: delay for power switching [20 usec]
;d16: delay for homospoil/gradient recovery
;cnst12: as multiplier for flip angle (1 = 90o) [1]
;l6: p18 * l6 = total duration of presaturation
; during relaxation delay [16]
;l7: p18 * l7 = total duration of presaturation
; during mixing time [1]
;l8: p18*l8 = total duration of presaturation with decoupling
;ns: 8 * n, total number of scans: NS * TD0
;ds: 4
;cpdprg2 : garp.p31 (decoupling sequence for low power cpd decoupling)

;use 100msec pulse of square shape defined by 1000 points

;for z-only gradients:
;gpz1: 50%
;gpz2: -10%

```

```
;use gradient files:
;gpnam1: SMSQ10.100
;gpnam2: SMSQ10.100

;preprocessor-flags-start
;FLAG_BLK: for BLKGRAD before d1 rather than go
; option -DFLAG_BLK: (eda: ZGOPTNS)
;preprocessor-flags-end

;$Id: lc1pncwgpps,v 1.4 2017/02/22 15:52:05 ber Exp $
```

**Figure S41.** Pulse programme for Bruker sequence lc1pndcgpps
